# Supplementary material for: Polyploidy Promotes Hypertranscription, Apoptosis Resistance, and Ciliogenesis in Cancer Cells and Mesenchymal Stem Cells of Various Origins: Comparative Transcriptome In Silico Study
Source: Int J Mol Sci. 2024 Apr 10;25(8):4185. doi: 10.3390/ijms25084185 (PMC11050069; doi:10.3390/ijms25084185)
Supplement: Supplementary file 1 [file ijms-25-04185-s001.zip]

Archive with 13 entries (13 files):
- Supplementary Figures All.pdf
- Supplementary Table S10 244_CP_DOWN_AV.xlsx
- Supplementary Table S11 Young CARD_UP_171_AV .xlsx
- Supplementary Table S12 young_CARD_DOWN_183_AV .xlsx
- Supplementary Table S1_Up_358_OK .xlsx
- Supplementary Table S2_113 PIEA_OK(1).xlsx
- Supplementary Table S3_Final_425_OK .xlsx
- Supplementary Table S4 DOWN_105 _OK_.xlsx
- Supplementary Table S5_Ips_Up (233 gene set)_OK_.xlsx
- Supplementary Table S6 Ips DOWN 244_.xlsx
- Supplementary Table S7 young_CARD_UP_OK _171.xlsx
- Supplementary Table S8 Young_Card_DOWN_183 gene set .xlsx
- Supplementary Table S9 _Biosyst_233_iPSC_CP Up_233_biosyst_overRp_AV.xlsx
