# Supplementary material for: Polyploidy Promotes Hypertranscription, Apoptosis Resistance, and Ciliogenesis in Cancer Cells and Mesenchymal Stem Cells of Various Origins: Comparative Transcriptome In Silico Study
Source: Int J Mol Sci. 2024 Apr 10;25(8):4185. doi: 10.3390/ijms25084185 (PMC11050069; doi:10.3390/ijms25084185)
Supplement: Supplementary file 1 [file ijms-25-04185-s001.zip › Supplementary Table S1_Up_358_OK .xlsx]

## Sheet: Лист1
	Supplementary Table S1. Consensus ploidy -upregulated genes in polyploid vs diploid cancer and MSC cells (358 gene set )
	NCBIid	Symb	Annot	*Poly/Dip Lg2_FC cancer	*Lg10_FDR	** Poly/Dip logFC_decidua MM	**adj_Pval	*** Poly/Dip log2 FC_Card_interst	***adjPVal_for ***	****log2 FC_ Poly/Dip MSC_BM	****adjPVal	*****log2 FC_trophoblast	adjPVal_for *****	Symb
	65985	AACS	acetoacetyl-CoA synthetase	0.0726345	9.55264	0.167748	0.0120001	0.0725294	0.00744744	0.279926	0.0997926	2.21352	1.93052e-10	AACS
	57122	NUP107	nucleoporin 107	0.0198788	37.9658	0.222845	8.25918e-06	0.0765405	0.000233545	0.291096	0.0997658	0.110064	0.00321357	NUP107
	54619	CCNJ	cyclin J	0.0626515	19.4475	0.0597631	0.0161178	0.0624723	0.00748933	0.292526	0.0997635	0.109172	0.00160048	CCNJ
	7750	ZMYM2	zinc finger MYM-type containing 2	0.0100807	6.25049	0.0412482	0.0316924	0.0612167	0.000326819	0.295715	0.0996851	0.109641	3.24656e-08	ZMYM2																																	bivalent		BOK
	26580	BSCL2	BSCL2 lipid droplet biogenesis associated, seipin	0.0747976	3.08102	0.00922658	0.00965404	0.0762321	0.0148783	0.22314	0.0996851	0.117061	0.00930002	BSCL2
	51571	CYRIB	CYFIP related Rac1 interactor B	0.0376177	17.6317	0.0835571	0.00012768	0.0803289	0.0079279	0.212234	0.0996584	0.401798	0.000698591	CYRIB
	27241	BBS9	Bardet-Biedl syndrome 9	0.0875387	6.53913	0.150416	0.00441975	0.0566246	0.000597866	0.228811	0.0995101	0.109273	2.34472e-06	BBS9
	150223	YDJC	YdjC chitooligosaccharide deacetylase homolog	0.0126444	20.0887	0.0171392	0.00409757	0.261137	0.00040232	0.224858	0.0994853	0.108983	1.70146e-06	YDJC
	51122	COMMD2	COMM domain containing 2	0.0133542	10.0472	0.0347593	0.0384863	0.274792	0.000221253	0.233325	0.0994411	0.111783	0.0141188	COMMD2
	29115	SAP30BP	SAP30 binding protein	0.0555709	5.03315	0.189844	0.0151726	0.127544	0.00457286	0.21787	0.0993542	0.130874	0.000375429	SAP30BP
	64130	LIN7B	lin-7 homolog B, crumbs cell polarity complex component	0.0134053	13.2754	0.0249858	0.00935132	0.0796682	0.00406552	0.227428	0.0992199	1.80642	0.000510608	LIN7B
	51542	VPS54	VPS54 subunit of GARP complex	0.018449	3.62205	0.111405	0.0134817	0.0291755	0.00743257	0.223973	0.0992199	0.143462	8.56149e-07	VPS54
	1399	CRKL	CRK like proto-oncogene, adaptor protein	0.0319899	4.35884	0.0164914	0.0196321	0.0466776	0.000288603	0.223774	0.0992199	0.10965	1.00428e-08	CRKL
	84313	VPS25	vacuolar protein sorting 25 homolog	0.0832515	12.7859	0.0412129	0.014826	0.121803	0.00371685	0.22005	0.0991513	0.10934	7.31123e-07	VPS25
	5687	PSMA6	proteasome 20S subunit alpha 6	0.0486994	10.0083	0.160246	0.0248196	0.23192	1.00462e-06	0.222978	0.0990951	0.135447	0.00862093	PSMA6
	145508	CEP128	centrosomal protein 128	0.0654392	10.0878	0.184813	0.0147597	0.0737872	0.000319715	0.231628	0.0990951	0.106362	1.33686e-07	CEP128
	10467	ZNHIT1	zinc finger HIT-type containing 1	0.0136186	4.33279	0.175409	0.0396416	0.182511	0.007506	0.234168	0.0989567	0.109425	4.83075e-09	ZNHIT1
	9282	MED14	mediator complex subunit 14	0.0740143	14.5508	0.0169728	0.00238213	0.114763	0.00243585	0.244772	0.0989552	0.218108	0.00830935	MED14
	6880	TAF9	TATA-box binding protein associated factor 9	0.0764855	12.353	0.153058	0.0125137	0.0219115	0.000358107	0.241498	0.0988787	0.116656	0.00757501	TAF9
	55219	MACO1	macoilin 1	0.0200189	7.81739	0.152883	0.0353493	0.0799482	0.0146606	0.244452	0.0988095	1.12181	3.19202e-12	SMARCA4
	6676	SPAG4	sperm associated antigen 4	0.0843765	16.1029	0.0598925	0.0154691	0.281188	0.00467223	0.268953	0.0988095	1.9294	1.08772e-10	SPAG4
	10113	PREB	prolactin regulatory element binding	0.0819734	7.34734	0.0310262	0.0145744	0.0763283	0.00219877	0.227617	0.0988095	0.11971	0.0143862	PREB
	23583	SMUG1	single-strand-selective monofunctional uracil-DNA glycosylase 1	0.0116021	13.8234	0.0907673	0.00987873	0.0215761	0.000171359	0.238227	0.0988095	0.405669	0.001284	SMUG1
	23613	ZMYND8	zinc finger MYND-type containing 8	0.0172487	20.0096	0.0160388	0.00210063	0.0966759	0.000334679	0.270476	0.0987158	0.10689	2.32248e-09	ZMYND8
	100	ADA	adenosine deaminase	0.0360771	9.55662	0.127747	0.00993205	0.0460886	0.000125971	0.294059	0.0986579	3.75836	4.10386e-09	ADA
	60314	MYG1	MYG1 exonuclease	0.0105136	6.79074	0.0702043	0.0169398	0.0788012	0.000331333	0.249041	0.0986145	0.492735	0.0645642	MYG1
	1072	CFL1	cofilin 1	0.0654506	7.01881	0.0616057	0.0396881	0.111003	0.00750263	0.238132	0.0986113	0.13993	5.13768e-06	CFL1
	84542	SANBR	SANT and BTB domain regulator of CSR	0.0762835	22.4174	0.213967	0.00949492	0.113908	0.00453056	0.24874	0.0985106	0.461248	0.0668795	SANBR
	9371	KIF3B	kinesin family member 3B	0.0129594	33.0155	0.0176752	0.00686196	0.130457	0.007564	0.282339	0.0984716	0.134313	0.000271435	KIF3B
	201255	LRRC45	leucine rich repeat containing 45	0.0122628	13.5526	0.220542	0.0395622	0.0809582	0.00471392	0.260844	0.098374	0.10669	5.1319e-08	LRRC45
	65263	PYCR3	pyrroline-5-carboxylate reductase 3	0.0805871	6.22786	0.0934618	0.0122169	0.096692	0.007821	0.259594	0.0982739	0.925673	0.000570861	PYCR3
	7534	YWHAZ	tyrosine 3-monooxygenase/tryptophan 5-monooxygenase activation protein zeta	0.0793467	32.4084	0.179209	0.0121597	0.0536102	0.00739144	0.235603	0.0981175	0.13258	8.56811e-06	YWHAZ
	55665	URGCP	upregulator of cell proliferation	0.0555402	5.18335	0.0191656	0.00284786	0.112355	0.000684284	0.285044	0.0980684	1.69396	2.46525e-14	URGCP
	10695	CNPY3	canopy FGF signaling regulator 3	0.0313163	6.57891	0.0610262	0.0339415	0.0572513	0.007	0.275583	0.0980006	1.61642	8.91064e-15	CNPY3
	9049	AIP	aryl hydrocarbon receptor interacting protein	0.0263094	3.94644	0.033694	0.00204733	0.0475341	0.00721557	0.252981	0.0978957	0.406525	0.000118935	AIP
	57634	EP400	E1A binding protein p400	0.0716159	6.29932	0.022886	0.0374244	0.244454	0.000308389	0.276675	0.0974016	0.135663	0.0647635	EP400
	54991	C1orf159	chromosome 1 open reading frame 159	0.0111872	12.0576	0.0606977	0.0162978	0.235864	0.000234832	0.210581	0.0972801	1.23596	1.46355e-09	C1orf159
	6199	RPS6KB2	ribosomal protein S6 kinase B2	0.0526013	2.77313	0.183349	0.00204688	0.0847566	0.00554804	0.289313	0.0972481	0.113981	0.0680317	RPS6KB2
	11171	STRAP	serine/threonine kinase receptor associated protein	0.0998212	8.7399	0.223139	0.00365003	0.0969304	0.00401325	0.291492	0.0972426	0.113842	0.0400055	STRAP
	25962	VIRMA	vir like m6A methyltransferase associated	0.0771102	20.0061	0.178675	0.0167775	0.0576616	0.000213352	0.267491	0.097104	0.25908	0.00398147	VIRMA
	22877	MLXIP	MLX interacting protein	0.0533241	2.36384	0.126172	0.0241255	0.111038	0.00445457	0.212	0.0970712	0.920751	0.0175071	MLXIP
	3955	LFNG	LFNG O-fucosylpeptide 3-beta-N-acetylglucosaminyltransferase	0.047	15.4284	0.0336448	0.00249089	0.0481589	0.00779468	0.230969	0.0969496	1.03064	0.000545961	LFNG
	29095	ORMDL2	ORMDL sphingolipid biosynthesis regulator 2	0.0309743	6.42676	0.0167891	0.00943911	0.0713277	0.000121879	0.212481	0.0969084	0.109967	4.31935e-09	ORMDL2
	117143	TADA1	transcriptional adaptor 1	0.0426063	7.16528	0.165589	0.0116679	0.0779824	0.00141173	0.212212	0.0969084	0.134812	0.0398128	TADA1
	22843	PPM1E	protein phosphatase, Mg2+/Mn2+ dependent 1E	0.0143441	6.65099	0.0127774	0.00971711	0.0946552	0.000144118	0.281852	0.0968611	1.18473	0.0207832	PPM1E
	10902	BRD8	bromodomain containing 8	0.0360583	10.0096	0.0210031	0.0354043	0.118514	3.01978e-05	0.209627	0.0967801	0.929866	1.16241e-11	BRD8
	949	SCARB1	scavenger receptor class B member 1	0.0117793	12.5828	0.222679	0.00387761	0.133555	4.25333e-05	0.210578	0.0967801	1.53096	4.76017e-06	SCARB1
	60412	EXOC4	exocyst complex component 4	0.041824	5.93612	0.169052	0.0191002	0.0419428	0.00143863	0.218061	0.0967457	0.131109	0.000266598	EXOC4
	64599	GIGYF1	GRB10 interacting GYF protein 1	0.011985	12.2059	0.0336613	0.0136717	0.287613	0.00027832	0.21122	0.0966198	0.415578	7.48815e-06	GIGYF1
	3251	HPRT1	hypoxanthine phosphoribosyltransferase 1	0.0662773	33.7758	0.02978	0.0152484	0.240746	4.52597e-05	0.210894	0.0965361	0.139367	0.00945118	HPRT1
	6903	TBCC	tubulin folding cofactor C	0.0419673	7.53521	0.0157699	0.00271521	0.236133	0.00541071	0.213681	0.0964192	0.143156	8.86446e-05	TBCC
	537	ATP6AP1	ATPase H+ transporting accessory protein 1	0.018426	13.2619	0.148787	0.0181769	0.274619	7.38658e-06	0.273752	0.0960581	0.163576	0.0432068	ATP6AP1
	84450	ZNF512	zinc finger protein 512	0.051542	23.1316	0.178898	0.00628734	0.0445653	0.000887175	0.212401	0.0960581	0.109315	0.0197467	ZNF512
	51184	GPN3	GPN-loop GTPase 3	0.0441066	3.07727	0.0131825	0.00223417	0.0941836	0.000280366	0.216775	0.096026	0.136393	0.00503295	GPN3
	6119	RPA3	replication protein A3	0.206532	34.0229	0.018238	0.0203082	0.272232	0.000568636	0.216703	0.0955858	0.153776	0.00815035	RPA3
	3480	IGF1R	insulin like growth factor 1 receptor	0.0244304	9.97972	0.011223	0.0264687	0.125985	2.52569e-05	0.213293	0.0955137	1.05672	5.72171e-09	IGF1R
	8886	DDX18	DEAD-box helicase 18	0.0733656	16.4109	0.145227	0.00221245	0.158677	0.000154612	0.215965	0.0955059	0.22267	0.0139577	DDX18
	80011	PSME3IP1	proteasome activator subunit 3 interacting protein 1	0.0335247	22.6625	0.178881	0.00673046	0.123454	0.00520394	0.213229	0.0954647	0.110931	0.00650555	PSME3IP1
	134359	POC5	POC5 centriolar protein	0.0479399	6.48792	0.119889	0.0399173	0.0807632	0.00400747	0.212948	0.095438	0.176082	0.0434297	POC5
	2521	FUS	FUS RNA binding protein	0.109502	19.5499	0.0832476	0.0156379	0.0596164	0.0293777	0.209882	0.0954295	0.193756	0.0295816	FUS
	25852	ARMC8	armadillo repeat containing 8	0.0263261	10.0676	0.0306943	0.00668056	0.241658	0.000377834	0.215855	0.09539	0.298454	0.000265773	ARMC8
	57468	SLC12A5	solute carrier family 12 member 5	0.0150617	7.44706	0.039753	0.0328599	0.0800782	0.00144176	0.214274	0.0951371	0.938646	0.0108202	SLC12A5
	152185	SPICE1	spindle and centriole associated protein 1	0.0575583	13.29	0.0514247	0.0204414	0.0942713	0.0146746	0.217109	0.0951327	0.442952	0.000561277	SPICE1
	55111	PLEKHJ1	pleckstrin homology domain containing J1	0.0109577	9.84345	0.0696636	0.0219746	0.113344	0.00017367	0.21279	0.0949365	0.118384	0.0296859	PLEKHJ1
	54935	DUSP23	dual specificity phosphatase 23	0.0293918	4.01467	0.0215466	0.00430683	0.0746647	0.0072547	0.215084	0.0949365	1.17414	3.61023e-07	DUSP23
	9129	PRPF3	pre-mRNA processing factor 3	0.013247	27.9277	0.127252	0.0102945	0.0401928	0.000428876	0.211316	0.0949365	0.143149	1.17869e-07	PRPF3
	147968	CAPN12	calpain 12	0.0912203	4.21423	0.194561	0.00985013	0.0617021	0.00248407	0.256377	0.094926	2.64065	2.04121e-11	CAPN12
	10262	SF3B4	splicing factor 3b subunit 4	0.0136995	30.0437	0.0187745	0.0130165	0.0733456	0.00665961	0.299104	0.0949087	0.11069	0.0204141	SF3B4
	131601	TPRA1	transmembrane protein adipocyte associated 1	0.0444211	6.78127	0.0190248	0.0195589	0.0469813	0.000124729	0.235003	0.0947305	0.132414	0.0095944	TPRA1
	64792	IFT22	intraflagellar transport 22	0.0102754	8.84287	0.0189452	0.0354703	0.0955934	0.0144613	0.216649	0.0945871	0.162173	0.00977456	IFT22
	8575	PRKRA	protein activator of interferon induced protein kinase EIF2AK2	0.0213592	11.7446	0.153382	0.0233507	0.0816793	0.00792446	0.214481	0.0945185	0.136364	8.05026e-06	PRKRA
	3927	LASP1	LIM and SH3 protein 1	0.0579846	8.27857	0.0809567	0.0365554	0.0954524	0.00244127	0.21552	0.0944608	3.19543	2.51349e-12	LASP1
	4356	MPP3	MAGUK p55 scaffold protein 3	0.0113428	12.679	0.220783	0.0243256	0.0284521	0.000474024	0.276443	0.0943306	1.52407	3.53851e-07	MPP3
	29101	SSU72	SSU72 homolog, RNA polymerase II CTD phosphatase	0.0726244	5.46058	0.168763	0.00318091	0.0410482	0.00289063	0.21314	0.0943306	0.119817	0.00948819	SSU72
	11267	SNF8	SNF8 subunit of ESCRT-II	0.0139209	13.7965	0.121869	0.0281215	0.127963	0.00751013	0.289286	0.0943102	0.138812	0.000340361	SNF8
	54903	MKS1	MKS transition zone complex subunit 1	0.0101542	13.048	0.214532	0.0110197	0.242171	0.0070871	0.214446	0.0943102	0.122391	0.00657865	MKS1
	89845	ABCC10	ATP binding cassette subfamily C member 10	0.048926	9.63439	0.0517102	0.0382933	0.0934789	0.00041663	0.216193	0.0942252	0.13989	0.00123974	ABCC10
	80143	SIKE1	suppressor of IKBKE 1	0.0596191	9.25378	0.176177	0.00296149	0.0804173	0.00721052	0.212682	0.0940244	0.11385	0.0319722	SIKE1
	23197	FAF2	Fas associated factor family member 2	0.0412624	7.58298	0.0101102	0.00816751	0.0958967	0.00272458	0.213597	0.0939807	0.143981	7.77622e-10	FAF2
	11321	GPN1	GPN-loop GTPase 1	0.0991925	29.6532	0.174261	0.0347064	0.0795557	0.00035328	0.221827	0.0939785	0.138511	8.40423e-06	GPN1
	90231	KIAA2013	KIAA2013	0.0580466	2.16591	0.189345	0.00981368	0.0414225	0.00143481	0.221876	0.09395	0.108734	1.09965e-10	KIAA2013
	23623	RUSC1	RUN and SH3 domain containing 1	0.0805473	5.9434	0.262507	0.00891299	0.0801816	0.000479048	0.21138	0.093889	0.109261	0.000117014	RUSC1
	23162	MAPK8IP3	mitogen-activated protein kinase 8 interacting protein 3	0.038496	3.91401	0.0183546	0.00205004	0.0460643	0.00710272	0.225893	0.0938721	0.950169	2.63968e-06	MAPK8IP3
	11222	MRPL3	mitochondrial ribosomal protein L3	0.0958294	30.2858	0.223766	0.0047994	0.0624881	0.000100698	0.212612	0.0938282	0.137466	0.000826988	MRPL3
	51119	SBDS	SBDS ribosome maturation factor	0.0717889	4.36547	0.022378	0.00248648	0.185559	0.00087508	0.222224	0.0934866	0.108542	1.7578e-09	SBDS
	55110	MAGOHB	mago homolog B, exon junction complex subunit	0.205729	29.1952	0.0179345	0.00882028	0.0966656	0.00742116	0.233981	0.0934064	0.491658	0.00205237	MAGOHB
	10466	COG5	component of oligomeric golgi complex 5	0.0724871	4.13603	0.138078	0.0301522	0.257869	0.00714384	0.22059	0.0930482	0.135262	0.000761405	COG5
	55835	CENPJ	centromere protein J	0.0171991	22.0937	0.158246	0.0139396	0.0721511	0.000373124	0.219105	0.0930482	0.143481	0.00016573	CENPJ
	139231	FAM199X	family with sequence similarity 199, X-linked	0.0330055	7.49479	0.0160286	0.00228615	0.11979	0.000524132	0.223877	0.0929659	0.449979	1.32803e-06	FAM199X
	10362	HMG20B	high mobility group 20B	0.0232993	3.87008	0.0180029	0.00935609	0.239475	0.00752	0.220042	0.0928324	0.29702	0.0486354	HMG20B
	58509	CACTIN	cactin, spliceosome C complex subunit	0.0659399	7.29421	0.0824904	0.0140299	0.1342	0.00483007	0.216795	0.0928236	0.206295	0.0371246	CACTIN
	64789	EXO5	exonuclease 5	0.0421432	14.492	0.0255335	0.0374792	0.0488511	0.007	0.243489	0.0927991	0.116876	0.0327424	EXO5
	129080	EMID1	EMI domain containing 1	0.0469534	7.73366	0.150293	0.0296432	0.0229566	0.000351235	0.215097	0.0926456	0.155262	0.00934373	EMID1
	80727	TTYH3	tweety family member 3	0.0148572	8.32901	0.157693	0.00366946	0.0578302	0.000242906	0.223635	0.0925554	3.64714	1.326e-12	TTYH3
	5914	RARA	retinoic acid receptor alpha	0.0193665	7.21986	0.0111865	0.00593737	0.0956644	0.000128612	0.220853	0.0924398	2.02312	8.33397e-08	RARA
	51107	APH1A	aph-1 homolog A, gamma-secretase subunit	0.0403183	17.5366	0.143832	0.0199628	0.0491014	0.00146053	0.215967	0.0923197	0.119477	0.00602139	APH1A
	55915	LANCL2	LanC like glutathione S-transferase 2	0.0670403	7.33086	0.168995	0.00928663	0.11558	0.00325007	0.23314	0.0921107	0.119751	0.0128401	LANCL2
	65980	BRD9	bromodomain containing 9	0.0156136	26.6536	0.0301025	0.0151252	0.0292117	0.00393919	0.219607	0.0920792	0.9374	2.97018e-10	BRD9
	64753	CCDC136	coiled-coil domain containing 136	0.0108743	3.23253	0.166016	0.0130787	0.130867	0.000104319	0.224069	0.0917978	1.56261	0.0647751	CCDC136
	94239	H2AZ2	H2A.Z variant histone 2	0.0112004	27.711	0.134884	0.00809354	0.266163	6.79634e-05	0.214551	0.0917745	0.143388	0.000164579	H2AZ2
	87178	PNPT1	polyribonucleotide nucleotidyltransferase 1	0.0123283	27.5358	0.138475	0.00296602	0.0607046	2.51726e-05	0.233351	0.0917567	0.119726	0.0339007	PNPT1
	162681	C18orf54	chromosome 18 open reading frame 54	0.0133481	22.6695	0.0132018	0.0266916	0.0289294	0.000129016	0.220842	0.0917041	3.6342	2.07497e-13	C18orf54
	83933	HDAC10	histone deacetylase 10	0.0713849	12.1559	0.0237174	0.013522	0.0474902	0.00628159	0.237429	0.0916053	1.29822	2.61982e-06	HDAC10
	5119	CHMP1A	charged multivesicular body protein 1A	0.0308402	7.13198	0.16573	0.022275	0.0837149	0.000862938	0.21823	0.0915235	0.110294	0.017762	CHMP1A
	146705	TEPSIN	TEPSIN adaptor related protein complex 4 accessory protein	0.085363	3.37506	0.0234627	0.00253803	0.0801203	0.00750613	0.219419	0.0914669	0.137561	0.0465166	TEPSIN
	79596	OBI1	ORC ubiquitin ligase 1	0.0388233	15.5971	0.188054	0.0154675	0.112511	0.00232024	0.250052	0.0912409	0.112879	0.00927297	OBI1
	54480	CHPF2	chondroitin polymerizing factor 2	0.0115964	5.75872	0.0170866	0.00293151	0.0764905	0.000157785	0.243386	0.0912409	1.16191	1.13007e-10	CHPF2
	79797	ZNF408	zinc finger protein 408	0.0555645	5.56349	0.0414898	0.0348581	0.0761563	0.000861557	0.224378	0.0911012	0.116501	0.0203802	ZNF408
	51258	MRPL51	mitochondrial ribosomal protein L51	0.0141741	19.2826	0.250564	0.000373849	0.185641	0.00746875	0.220485	0.0910756	0.254989	0.0238281	MRPL51
	865	CBFB	core-binding factor subunit beta	0.022968	17.2993	0.264146	0.0139507	0.0808629	0.00638868	0.23102	0.0910695	0.143892	9.84001e-09	CBFB
	55257	MRGBP	MRG domain binding protein	0.258636	104.911	0.181908	0.0367444	0.0205198	0.00255257	0.232855	0.0910643	0.133897	0.0074663	MRGBP
	7013	TERF1	telomeric repeat binding factor 1	0.0652436	12.1513	0.0158697	0.00991287	0.0741183	0.000348602	0.222782	0.0910471	0.133024	0.00495508	TERF1
	51319	RSRC1	arginine and serine rich coiled-coil 1	0.0619193	10.0099	0.0100052	0.0324054	0.0955522	0.00731277	0.231331	0.0909594	0.143936	6.28384e-09	RSRC1
	83693	HSDL1	hydroxysteroid dehydrogenase like 1	0.0251387	24.2929	0.164987	0.00903665	0.022435	0.000318059	0.230592	0.0909075	0.262976	0.0158162	HSDL1
	747	DAGLA	diacylglycerol lipase alpha	0.015856	8.85974	0.167281	0.0197969	0.0945563	0.00526747	0.2434	0.0909075	2.62972	2.00769e-07	DAGLA
	221424	LRRC73	leucine rich repeat containing 73	0.0241083	6.02031	0.16627	0.0230932	0.0570843	0.00285812	0.220515	0.0909047	0.14394	0.0169859	LRRC73
	4651	MYO10	myosin X	0.0617821	5.1213	0.0180563	0.0133339	0.264805	7.57141e-06	0.239456	0.0909047	0.966643	8.60346e-07	MYO10
	55973	BCAP29	B cell receptor associated protein 29	0.0325422	10.0085	0.0105559	0.00743392	0.0506553	0.007	0.219075	0.0909047	1.33533	1.06864e-12	BCAP29
	94005	PIGS	phosphatidylinositol glycan anchor biosynthesis class S	0.0493897	9.00831	0.191695	0.022711	0.0209422	0.0142351	0.217182	0.0908034	1.13142	6.48231e-12	PIGS
	57609	DIP2B	disco interacting protein 2 homolog B	0.0293264	3.29697	0.0999722	0.0258086	0.274944	0.000139636	0.236929	0.0907661	0.132129	0.0298083	DIP2B
	9587	MAD2L1BP	MAD2L1 binding protein	0.0102519	2.32856	0.010602	0.00923565	0.229374	4.79495e-05	0.220424	0.0906119	0.130057	0.0224798	MAD2L1BP
	90639	COX19	cytochrome c oxidase assembly factor COX19	0.0139865	14.3093	0.0167796	0.00236127	0.298918	0.00376167	0.226181	0.0904836	0.278642	0.0500488	COX19
	90990	KIFC2	kinesin family member C2	0.0659872	15.1677	0.223138	0.00948943	0.131845	0.000134334	0.21774	0.0904604	0.143536	0.00670402	KIFC2
	6868	ADAM17	ADAM metallopeptidase domain 17	0.0294487	6.95765	0.0188345	0.000231066	0.0515479	0.00790544	0.222744	0.0903938	0.106462	7.42983e-10	ADAM17
	8907	AP1M1	adaptor related protein complex 1 subunit mu 1	0.0454025	3.77241	0.0239078	0.0022042	0.189352	0.00589197	0.227665	0.0903926	0.464928	4.35361e-07	AP1M1
	51588	PIAS4	protein inhibitor of activated STAT 4	0.0690323	7.47263	0.00959182	0.00617967	0.00960721	0.00976885	0.228472	0.0903409	0.375049	0.0001475	PIAS4
	11187	PKP3	plakophilin 3	0.0164827	5.41324	0.0911414	0.0247109	0.0807265	0.000827934	0.21393	0.090227	0.143565	3.0409e-07	PKP3
	51071	DERA	deoxyribose-phosphate aldolase	0.0865361	2.4375	0.171861	0.0255937	0.241387	0.000684284	0.239099	0.090212	0.15262	0.00992483	DERA
	375035	SFT2D2	SFT2 domain containing 2	0.0306933	3.36212	0.169168	0.00211451	0.274701	0.00219498	0.218054	0.0901754	1.62951	3.16547e-12	SFT2D2
	55209	SETD5	SET domain containing 5	0.0555231	3.21141	0.178828	0.00977692	0.114025	0.00794715	0.225769	0.0885731	0.231028	0.0267964	SETD5
	6045	RNF2	ring finger protein 2	0.0828514	10.2103	0.019611	0.0355516	0.0460454	0.0850618	0.244441	0.08459	0.134196	0.000122602	RNF2
	23126	POGZ	pogo transposable element derived with ZNF domain	0.0586943	16.7417	0.0311313	0.00137415	0.050259	0.00865414	0.238233	0.0837496	0.243771	0.0294519	POGZ
	4289	MKLN1	muskelin 1	0.0181652	2.97236	0.17749	0.00938911	0.243922	0.0139525	0.242468	0.0821167	0.130567	0.00011243	MKLN1
	23450	SF3B3	splicing factor 3b subunit 3	0.107746	27.2412	0.184283	0.00168677	0.0936083	0.0273992	0.234456	0.0805354	0.13316	0.0111168	SF3B3
	6944	VPS72	vacuolar protein sorting 72 homolog	0.147867	59.8419	0.0180591	0.00231565	0.240949	0.00242906	0.104801	0.0797374	0.194338	0.00827766	VPS72
	8464	SUPT3H	SPT3 homolog, SAGA and STAGA complex component	0.0472716	13.7684	0.106714	0.00578235	0.0976724	0.0509651	0.112631	0.0797374	0.408331	0.000112001	SUPT3H
	4613	MYCN	MYCN proto-oncogene, bHLH transcription factor	0.135998	13.0081	0.0920755	0.00410462	0.0755434	0.0193652	0.257586	0.0797374	2.39104	2.13561e-11	MYCN
	196528	ARID2	AT-rich interaction domain 2	0.0201711	5.00782	0.0182374	0.00375275	0.00963392	0.00759501	0.263307	0.0797374	0.421056	1.18727e-05	ARID2
	10856	RUVBL2	RuvB like AAA ATPase 2	0.164527	16.0152	0.183888	2.1954e-05	0.0698344	0.00702126	0.203489	0.0797374	0.555127	1.7565e-05	RUVBL2
	387263	C6orf120	chromosome 6 open reading frame 120	0.00938501	7.25908	0.185048	0.00987426	0.078998	0.0070339	0.21059	0.00898049	0.130168	0.00665909	C6orf120
	9696	CROCC	ciliary rootlet coiled-coil, rootletin	0.0431727	7.31263	0.216429	0.00963059	0.234854	0.0254587	0.243241	0.00898049	0.957336	0.00700056	CROCC
	10009	ZBTB33	zinc finger and BTB domain containing 33	0.0338198	12.8737	0.040742	0.0206487	0.271456	0.000116962	0.295486	0.00897374	0.137054	0.000220872	ZBTB33
	51172	NAGPA	N-acetylglucosamine-1-phosphodiester alpha-N-acetylglucosaminidase	0.0313783	2.65603	0.176482	0.020708	0.253865	0.00647576	0.277287	0.00897374	0.419308	0.00502031	NAGPA
	10644	IGF2BP2	insulin like growth factor 2 mRNA binding protein 2	0.0157609	23.102	0.0106827	0.0328605	0.0735029	0.000426394	0.213935	0.00897374	3.27946	2.28036e-13	IGF2BP2
	8270	LAGE3	L antigen family member 3	0.0153937	27.2599	0.171977	0.0239382	0.118984	0.00577347	0.275431	0.00897374	0.134031	0.0581996	LAGE3
	23481	PES1	pescadillo ribosomal biogenesis factor 1	0.0154773	17.7933	0.171639	0.0298955	0.0435041	0.000461014	0.228653	0.00897374	0.115843	0.013679	PES1
	254065	BRWD3	bromodomain and WD repeat domain containing 3	0.0150211	5.91771	0.0130877	0.0150355	0.0296447	0.000644524	0.28602	0.00897374	1.15831	3.72813e-12	BRWD3
	84186	ZCCHC7	zinc finger CCHC-type containing 7	0.048545	8.37487	0.0699952	0.0397585	0.0607903	0.00142504	0.279942	0.00897374	1.05627	3.60701e-12	ZCCHC7
	23435	TARDBP	TAR DNA binding protein	0.0706434	27.5858	0.164897	0.0234939	0.055785	0.00788	0.25541	0.00897374	0.192981	0.0216162	TARDBP
	4752	NEK3	NIMA related kinase 3	0.0836448	13.4748	0.0932068	0.0114849	0.00958976	0.000122231	0.212627	0.00897374	0.287436	0.0488528	NEK3
	84918	LRP11	LDL receptor related protein 11	0.060618	25.3145	0.261626	0.021751	0.270778	0.007264	0.292429	0.00897374	0.108173	0.0286795	LRP11
	81669	CCNL2	cyclin L2	0.0109281	7.56116	0.0394158	0.0391733	0.240717	0.000373627	0.269584	0.00897374	0.133203	0.00765583	CCNL2
	10001	MED6	mediator complex subunit 6	0.0712361	2.56325	0.0403288	0.0284218	0.0288789	0.0146639	0.268644	0.00897374	0.11262	0.0142915	MED6
	2673	GFPT1	glutamine--fructose-6-phosphate transaminase 1	0.0100243	8.19183	0.0519891	0.037294	0.0231472	0.00033666	0.211914	0.00897374	0.10625	1.03531e-08	GFPT1
	9689	BZW1	basic leucine zipper and W2 domains 1	0.0960795	3.037	0.152196	0.00935384	0.11571	0.000305953	0.24232	0.00897374	0.482008	3.53274e-06	BZW1
	6048	RNF5	ring finger protein 5	0.056571	15.3931	0.212447	0.00914234	0.286524	0.00365033	0.2994	0.00897374	0.10616	1.75272e-09	RNF5
	79692	ZNF322	zinc finger protein 322	0.0710823	6.83796	0.14516	0.0291173	0.298225	0.00734	0.213845	0.00897374	0.109148	0.00460433	ZNF322
	54916	TMEM260	transmembrane protein 260	0.0667051	8.59479	0.0125148	0.0138337	0.114565	0.00015135	0.21824	0.00897374	0.114879	0.00754511	TMEM260
	64061	TSPYL2	TSPY like 2	0.0892312	4.0368	0.0126596	0.00849951	0.11881	0.007	0.269281	0.00897374	0.116084	0.0261588	TSPYL2
	440026	TMEM41B	transmembrane protein 41B	0.0144314	6.57413	0.168202	0.0164506	0.252162	0.00629611	0.287648	0.00897374	0.109911	2.24641e-07	TMEM41B
	9127	P2RX6	purinergic receptor P2X 6	0.028269	6.86678	0.0244702	0.0135824	0.0790082	0.000224258	0.214643	0.00897374	1.53675	0.000146911	P2RX6
	2802	GOLGA3	golgin A3	0.0345239	6.82999	0.176511	0.033968	0.0437237	0.0073625	0.285731	0.00897374	0.108829	3.10188e-10	GOLGA3
	115908	CTHRC1	collagen triple helix repeat containing 1	0.0462319	7.3228	0.0168036	0.0134742	0.0526836	0.0075	0.417324	0.00897374	3.16133	2.10708e-06	CTHRC1
	221184	CPNE2	copine 2	0.0961577	7.45827	0.208234	0.00378521	0.0706489	0.00626268	0.219004	0.00897374	1.73547	6.6563e-07	CPNE2
	91408	BTF3L4	basic transcription factor 3 like 4	0.0284316	4.17969	0.0125477	0.026837	0.239075	0.00744577	0.211664	0.00897374	0.137895	0.0438987	BTF3L4
	133957	CCDC127	coiled-coil domain containing 127	0.0722579	8.15859	0.217493	0.00341448	0.0542127	0.00743197	0.257587	0.00897374	0.141161	0.00815294	CCDC127
	8497	PPFIA4	PTPRF interacting protein alpha 4	0.0182135	6.25711	0.161942	0.0132119	0.0400513	3.41667e-05	0.22665	0.00897374	2.61507	3.30552e-08	PPFIA4
	79071	ELOVL6	ELOVL fatty acid elongase 6	0.0255278	8.71435	0.149563	0.00758388	0.258469	0.00719218	0.203026	0.00897374	2.52547	8.53981e-09	ELOVL6
	130827	TMEM182	transmembrane protein 182	0.0356255	7.29426	0.0302411	0.0304403	0.114487	0.0071926	0.292765	0.00897374	0.21516	0.0135188	TMEM182
	10994	ILVBL	ilvB acetolactate synthase like	0.0904786	6.90998	0.182174	0.0300613	0.0220008	0.00784878	0.213437	0.00897374	0.106778	2.21161e-09	ILVBL
	4040	LRP6	LDL receptor related protein 6	0.0160518	7.82252	0.0819107	0.029562	0.0899413	0.000380166	0.289882	0.00897374	0.290153	0.0184846	LRP6
	121441	NEDD1	NEDD1 gamma-tubulin ring complex targeting factor	0.0427214	2.90721	0.135516	0.0145425	0.0456999	0.007855	0.286049	0.00897374	0.143878	8.61871e-08	NEDD1
	7448	VTN	vitronectin	0.0465646	3.54713	0.160978	0.00296149	0.0952498	0.000285021	0.22206	0.00897374	3.35434	0.00604272	VTN
	160897	GPR180	G protein-coupled receptor 180	0.0248752	6.56981	0.0159703	0.00913651	0.287698	0.00243725	0.212995	0.00897374	1.46322	1.61606e-12	GPR180
	25855	BRMS1	BRMS1 transcriptional repressor and anoikis regulator	0.074892	6.05512	0.022947	0.00912618	0.0764319	0.000147377	0.264488	0.00897374	0.189491	0.0229287	BRMS1
	9950	GOLGA5	golgin A5	0.0199631	3.88485	0.0231278	0.00294528	0.299595	0.00241469	0.210073	0.00897374	0.109944	1.79798e-08	GOLGA5
	57407	NMRAL1	NmrA like redox sensor 1	0.0403495	2.3856	0.153443	0.0130154	0.056014	0.0041058	0.210757	0.00897374	0.131573	0.000197213	NMRAL1
	139341	FUNDC1	FUN14 domain containing 1	0.0408251	9.36473	0.0202546	0.00293643	0.0226925	0.00737554	0.212632	0.00897374	0.11281	0.0273854	FUNDC1
	51111	KMT5B	lysine methyltransferase 5B	0.0161091	8.6255	0.0926763	0.025372	0.0215028	0.00244963	0.262831	0.00897374	0.427219	1.52776e-06	KMT5B
	124401	ANKS3	ankyrin repeat and sterile alpha motif domain containing 3	0.0568433	4.54446	0.171139	0.00437588	0.121585	0.000167703	0.280951	0.00897374	0.11254	0.0196975	ANKS3
	84940	CORO6	coronin 6	0.062235	6.21445	0.147363	0.00437202	0.0706199	0.00147566	0.214137	0.00897374	4.15461	1.0457e-09	CORO6
	8295	TRRAP	transformation/transcription domain associated protein	0.0118413	7.63712	0.0212662	0.00400176	0.0959908	0.02563	0.267602	0.00897374	1.02449	1.97333e-08	TRRAP
	83439	TCF7L1	transcription factor 7 like 1	0.0568798	9.69812	0.169171	0.00675534	0.0288864	0.0145206	0.203297	0.00897374	1.18593	0.038466	TCF7L1
	26115	TANC2	tetratricopeptide repeat, ankyrin repeat and coiled-coil containing 2	0.0405635	8.58323	0.206151	0.00660097	0.0231987	0.000182755	0.211223	0.00897374	1.47316	5.27037e-11	TANC2
	55322	C5orf22	chromosome 5 open reading frame 22	0.0756499	13.5789	0.0702905	0.013128	0.119957	0.000374548	0.280899	0.00897374	0.468507	1.24593e-06	C5orf22
	29100	TMEM208	transmembrane protein 208	0.094169	6.54741	0.0341165	0.00659534	0.0970323	0.00243326	0.275771	0.00897374	0.143474	9.99722e-08	TMEM208
	80312	TET1	tet methylcytosine dioxygenase 1	0.218635	24.2785	0.0178282	0.00225023	0.273629	0.00356432	0.211017	0.00897374	0.106026	0.000180593	TET1
	53345	TM6SF2	transmembrane 6 superfamily member 2	0.0995861	4.00465	0.150281	0.00220664	0.0786308	0.000293299	0.274903	0.00897374	1.74714	0.0269916	TM6SF2
	55297	CCDC91	coiled-coil domain containing 91	0.0523764	10.0129	0.176703	0.010745	0.292641	0.000345144	0.21105	0.00897374	0.108021	0.00119386	CCDC91
	9016	SLC25A14	solute carrier family 25 member 14	0.0671545	17.0551	0.0343625	0.00208313	0.244143	0.00220316	0.284019	0.00897374	0.202808	0.0120489	SLC25A14
	9891	NUAK1	NUAK family kinase 1	0.0686912	4.35596	0.0159072	0.00206196	0.124682	0.000365289	0.239084	0.00897374	4.13586	3.02235e-12	NUAK1
	6601	SMARCC2	SWI/SNF related, matrix associated, actin dependent regulator of chromatin subfamily c member 2	0.0489352	7.788	0.0301839	0.00206009	0.115533	0.00537555	0.299159	0.00897374	0.256878	0.0130211	SMARCC2
	221955	DAGLB	diacylglycerol lipase beta	0.0812063	10.0304	0.218767	0.00502029	0.119925	0.0042665	0.216813	0.00897374	1.11661	0.00452098	DAGLB
	55698	RADIL	Rap associating with DIL domain	0.0100477	5.10876	0.144412	0.0101571	0.277828	0.00661654	0.215052	0.00897374	1.54493	0.0153096	RADIL
	29985	SLC39A3	solute carrier family 39 member 3	0.0385697	5.15396	0.0304001	0.0193724	0.118194	0.0045975	0.212793	0.00897374	0.986514	4.24226e-07	SLC39A3
	84668	HYCC1	hyccin PI4KA lipid kinase complex subunit 1	0.0962054	6.74852	0.0255462	0.0183491	0.0533576	0.00674505	0.290618	0.00897374	0.937936	1.04518e-07	HYCC1
	7355	SLC35A2	solute carrier family 35 member A2	0.0133912	41.8976	0.030626	0.0183419	0.0610048	0.00661492	0.21454	0.00897374	0.109774	1.98928e-06	SLC35A2
	7072	TIA1	TIA1 cytotoxic granule associated RNA binding protein	0.0655706	9.25349	0.173751	0.0174214	0.0755688	0.0144877	0.213719	0.00897374	0.11785	0.0613991	TIA1
	5255	PHKA1	phosphorylase kinase regulatory subunit alpha 1	0.022155	10.0194	0.0820682	0.0171742	0.0286351	0.00058296	0.27813	0.00897374	0.116124	0.00610344	PHKA1
	80254	CEP63	centrosomal protein 63	0.0529026	2.32533	0.0831723	0.0166954	0.0748333	0.000423538	0.263175	0.00897374	0.136741	0.000982017	CEP63
	2332	FMR1	fragile X messenger ribonucleoprotein 1	0.025309	17.629	0.0176765	0.0161618	0.0298177	0.000874272	0.214687	0.00897374	0.111774	0.019168	FMR1
	5881	RAC3	Rac family small GTPase 3	0.250139	20.0434	0.180516	0.0148094	0.0757848	0.000303192	0.256722	0.00897374	1.69296	2.22408e-11	RAC3
	9841	ZBTB24	zinc finger and BTB domain containing 24	0.0495755	4.9205	0.184687	0.0146312	0.241358	0.000399382	0.289177	0.00897374	0.293282	0.0551871	ZBTB24
	10682	EBP	EBP cholestenol delta-isomerase	0.0165467	36.9259	0.0316034	0.0116662	0.0704307	0.00319327	0.216437	0.00897374	0.467439	0.015821	EBP
	55605	KIF21A	kinesin family member 21A	0.0856091	11.6992	0.154792	0.0115047	0.260723	0.0075	0.271093	0.00897374	2.56797	5.16127e-12	KIF21A
	4848	CNOT2	CCR4-NOT transcription complex subunit 2	0.0763792	4.28699	0.0337373	0.00113955	0.0733334	0.00664958	0.210041	0.00897374	0.417556	6.6495e-07	CNOT2
	2519	FUCA2	alpha-L-fucosidase 2	0.0193831	5.7763	0.209988	0.00257661	0.266629	0.00571825	0.211595	0.00897374	1.492	2.10568e-12	FUCA2
	55610	VPS50	VPS50 subunit of EARP/GARPII complex	0.0101465	4.88377	0.0527399	0.0112362	0.071294	0.00707211	0.210432	0.00897374	0.226728	0.0180463	VPS50
	5360	PLTP	phospholipid transfer protein	0.0726476	9.32389	0.258413	0.00244406	0.0747836	2.28324e-13	0.487981	0.00897374	4.68989	2.92663e-14	PLTP
	151195	CCNYL1	cyclin Y like 1	0.0264487	7.34049	0.158036	0.00560096	0.029638	0.00733655	0.240832	0.00897374	0.10617	4.99023e-06	CCNYL1
	388962	BOLA3	bolA family member 3	0.0104512	16.2978	0.017902	0.00228982	0.074243	0.00014256	0.299129	0.00897374	1.11274	1.75e-07	BOLA3
	79752	ZFAND1	zinc finger AN1-type containing 1	0.0202713	6.47554	0.0816019	0.0158814	0.0733255	0.00701999	0.253635	0.00897374	0.450401	5.75622e-06	ZFAND1
	1069	CETN2	centrin 2	0.065712	12.3455	0.221592	0.0151771	0.120496	8.9884e-05	0.214267	0.00897374	0.10916	0.000175299	CETN2
	139886	SPIN4	spindlin family member 4	0.0490014	9.98313	0.178762	0.00170748	0.277759	0.000291376	0.211338	0.00897374	1.15936	1.73536e-10	SPIN4
	60561	RINT1	RAD50 interactor 1	0.0105067	15.8673	0.164593	0.0112196	0.0709146	0.0141112	0.21206	0.00897374	0.116612	0.0434753	RINT1
	55636	CHD7	chromodomain helicase DNA binding protein 7	0.0157071	23.5399	0.496116	0.00149165	0.0529965	0.00725488	0.279725	0.00897374	0.143792	0.00890376	CHD7
	57102	C12orf4	chromosome 12 open reading frame 4	0.0118495	5.97009	0.182422	0.0353467	0.131075	0.0140585	0.276623	0.00897374	0.18372	0.0397186	C12orf4
	50814	NSDHL	NAD(P) dependent steroid dehydrogenase-like	0.0132119	29.0802	0.165471	0.00110778	0.0229149	0.000270195	0.230659	0.00897374	0.118926	0.00751739	NSDHL
	23322	RPGRIP1L	RPGRIP1 like	0.010423	4.77713	0.221908	0.0338161	0.23584	0.0004256	0.224106	0.00897374	0.178044	0.0435863	RPGRIP1L
	23029	RBM34	RNA binding motif protein 34	0.0126855	11.0375	0.164232	0.0167754	0.0737123	0.00794	0.279554	0.00897374	0.112206	0.0435735	RBM34
	6742	SSBP1	single stranded DNA binding protein 1	0.0795921	11.9474	0.0125742	0.0158365	0.0529685	0.000267497	0.212179	0.00897374	0.121112	0.00827136	SSBP1
	55773	TBC1D23	TBC1 domain family member 23	0.0209449	2.58891	0.157569	0.0155998	0.0573156	0.00708474	0.275147	0.00897374	0.274658	0.0236613	TBC1D23
	6809	STX3	syntaxin 3	0.0317307	14.9304	0.205543	0.000686955	0.05213	0.007443	0.265451	0.00897374	0.124238	0.00679781	STX3
	2649	NR6A1	nuclear receptor subfamily 6 group A member 1	0.0195813	18.3012	0.0201431	0.00486893	0.133707	0.000506452	0.269249	0.00897374	1.15794	1.83027e-09	NR6A1
	51534	VTA1	vesicle trafficking 1	0.0107689	8.55582	0.176839	0.00975454	0.0585123	0.000190779	0.265207	0.00897374	0.131148	0.00131437	VTA1
	10643	IGF2BP3	insulin like growth factor 2 mRNA binding protein 3	0.00913	25.2373	0.041256	0.0097495	0.0492859	0.000519533	0.274657	0.00897374	0.132364	0.000675294	IGF2BP3
	3476	IGBP1	immunoglobulin binding protein 1	0.0271617	25.4234	0.0903539	0.00937785	0.0562005	0.0140815	0.291507	0.00897374	0.270825	0.0150796	IGBP1
	23097	CDK19	cyclin dependent kinase 19	0.0298537	12.7228	0.0997025	0.00901662	0.299268	0.00246025	0.213021	0.00897374	1.83028	6.3305e-13	CDK19
	10897	YIF1A	Yip1 interacting factor homolog A, membrane trafficking protein	0.0102786	6.21138	0.157424	0.00043795	0.0789627	0.000422251	0.277648	0.00897374	1.419	4.2698e-13	YIF1A
	10014	HDAC5	histone deacetylase 5	0.0740115	13.9917	0.268373	0.000383677	0.0946855	0.000335336	0.212041	0.00897374	0.109621	1.24771e-07	HDAC5
	64743	WDR13	WD repeat domain 13	0.0460312	2.92364	0.183224	0.00619184	0.0975913	0.00775	0.25278	0.00897374	0.131082	0.00840458	WDR13
	6483	ST3GAL2	ST3 beta-galactoside alpha-2,3-sialyltransferase 2	0.0260938	8.66379	0.262639	0.00357088	0.257151	0.00719707	0.211321	0.00897374	0.116096	0.039104	ST3GAL2
	22897	CEP164	centrosomal protein 164	0.0321591	7.32552	0.0189936	0.00193964	0.259335	0.00760227	0.274513	0.00897374	0.136849	0.0192335	CEP164
	3897	L1CAM	L1 cell adhesion molecule	0.246005	26.6339	0.0312186	0.000131395	0.257026	0.000177007	0.268195	0.00897374	1.30414	0.00495875	L1CAM
	3189	HNRNPH3	heterogeneous nuclear ribonucleoprotein H3	0.0450271	17.3179	0.0559754	0.00991287	0.077185	0.000855579	0.265854	0.00897374	0.112714	0.0427487	HNRNPH3
	5110	PCMT1	protein-L-isoaspartate (D-aspartate) O-methyltransferase	0.0803059	14.1074	0.0803059	0.0167754	0.256048	2.26017e-05	0.267159	0.00897374	0.143063	3.57521e-08	PCMT1
	57348	TTYH1	tweety family member 1	0.210014	7.96887	0.22	0.0155998	0.130599	0.000632646	0.23554	0.00897374	1.8499	0.0352759	TTYH1
	116840	CNTROB	centrobin, centriole duplication and spindle assembly protein	0.0333424	7.63868	0.15624	0.0134664	0.117992	0.0070031	0.222293	0.00699029	0.21582	0.011257	CNTROB
	91147	TMEM67	transmembrane protein 67	0.0344435	4.63444	0.0108179	0.00952947	0.121686	0.00240396	0.230684	0.00698053	0.143861	0.0246998	TMEM67
	988	CDC5L	cell division cycle 5 like	0.0292376	12.4373	0.0830925	0.018045	0.203745	2.1449e-12	0.222111	0.00695801	0.122388	0.00844316	CDC5L
	125965	COX6B2	cytochrome c oxidase subunit 6B2	0.0100342	6.46306	0.205383	0.0110918	0.0290561	0.00630547	0.211938	0.00694488	2.18436	0.00779204	COX6B2
	22818	COPZ1	COPI coat complex subunit zeta 1	0.0892545	7.33197	0.175254	0.00942972	0.11032	0.000293439	0.222349	0.00693431	0.137894	2.46895e-06	COPZ1
	5744	PTHLH	parathyroid hormone like hormone	0.0445968	6.80512	0.186259	0.0227214	0.00979486	0.000842631	0.221206	0.00692637	1.13935	0.00758709	PTHLH
	11269	DDX19B	DEAD-box helicase 19B	0.0155263	10.4568	0.176952	0.0122672	0.0700608	0.000166546	0.233676	0.00692439	0.131616	0.00879902	DDX19B
	91544	UBXN11	UBX domain protein 11	0.0311486	7.38623	0.0190441	0.00486753	0.0802207	0.00676526	0.251257	0.00689831	2.07468	7.3763e-14	UBXN11
	85474	LBX2	ladybird homeobox 2	0.0137712	11.3066	0.018602	0.00295822	0.0597579	0.00053053	0.211021	0.00689613	1.04703	0.00334119	LBX2
	65010	SLC26A6	solute carrier family 26 member 6	0.0132584	6.73184	0.010982	0.0215687	0.0945685	0.00701	0.221117	0.00689613	1.45463	4.07601e-11	SLC26A6
	11022	TDRKH	tudor and KH domain containing	0.0808832	56.6936	0.163053	0.0122182	0.0581661	0.00308236	0.213094	0.00689595	0.28592	0.0198671	TDRKH
	197335	WDR90	WD repeat domain 90	0.010793	8.0765	0.21085	0.0302157	0.0428173	0.00369888	0.240245	0.00687584	0.126092	0.00631436	WDR90
	55209	SETD5	SET domain containing 5	0.0555231	3.21141	0.178828	0.00977692	0.114025	0.007382	0.225769	0.00685731	0.231028	0.0267964	SETD5
	5147	PDE6D	phosphodiesterase 6D	0.0155895	3.84307	0.0175435	0.0173699	0.113766	0.00599473	0.223918	0.00685231	0.109018	3.71766e-07	PDE6D
	283237	TTC9C	tetratricopeptide repeat domain 9C	0.034988	10.0434	0.0558046	0.0148854	0.0715517	0.000246936	0.24017	0.00685061	0.117859	0.00829259	TTC9C
	4137	MAPT	microtubule associated protein tau	0.0865507	6.63713	0.0499032	0.018159	0.192941	0.000377963	0.21175	0.0068425	3.83007	4.80475e-10	MAPT
	246243	RNASEH1	ribonuclease H1	0.0147604	26.0487	0.192398	0.0171953	0.283914	0.000372982	0.226666	0.0068276	0.183285	0.035088	RNASEH1
	10951	CBX1	chromobox 1	0.0122279	38.9308	0.164324	0.0396066	0.0535625	0.000292522	0.22363	0.00681089	0.182257	0.0295816	CBX1
	25948	KBTBD2	kelch repeat and BTB domain containing 2	0.0614861	12.537	0.0559754	0.019795	0.0721545	0.00019597	0.229992	0.00680106	0.156782	0.0431131	KBTBD2
	11054	OGFR	opioid growth factor receptor	0.098138	10.4331	0.0601374	0.0135848	0.297575	0.00429532	0.227154	0.00679326	0.108712	1.53981e-08	OGFR
	5062	PAK2	p21 (RAC1) activated kinase 2	0.0391293	2.85632	0.180496	0.00508389	0.257524	1.71237e-05	0.220265	0.00679326	0.106141	2.25093e-08	PAK2
	64210	MMS19	MMS19 homolog, cytosolic iron-sulfur assembly component	0.0388695	3.25172	0.0101714	0.00925723	0.274144	0.000282996	0.230384	0.00679326	0.143212	1.97883e-07	MMS19
	5052	PRDX1	peroxiredoxin 1	0.039929	2.17179	0.0177278	0.013331	0.0526575	0.000212781	0.223774	0.0067665	0.159426	0.0434323	PRDX1
	10285	SMNDC1	survival motor neuron domain containing 1	0.0210974	4.53512	0.0319945	0.0327572	0.0745742	0.00015383	0.249487	0.00674039	0.13717	0.000919462	SMNDC1
	55124	PIWIL2	piwi like RNA-mediated gene silencing 2	0.0694555	3.99935	0.264693	0.0263049	0.238015	0.000194737	0.217829	0.00674022	1.89773	0.00032367	PIWIL2
	55146	ZDHHC4	zinc finger DHHC-type palmitoyltransferase 4	0.01024	9.83719	0.0613843	0.00909851	0.07604	0.0143726	0.223112	0.00673745	0.134836	0.000371924	ZDHHC4
	22950	SLC4A1AP	solute carrier family 4 member 1 adaptor protein	0.0609469	21.0487	0.135114	0.00938975	0.0478904	0.000744589	0.226347	0.00673124	0.143606	0.04802	SLC4A1AP
	80228	ORAI2	ORAI calcium release-activated calcium modulator 2	0.0518159	7.41737	0.214851	0.000957417	0.0795105	0.0024404	0.251377	0.0067237	0.106286	0.00533743	ORAI2
	670	BPHL	biphenyl hydrolase like	0.0100008	13.6482	0.0110975	0.0247658	0.0804129	0.000857214	0.237763	0.00671867	0.134614	0.00952391	BPHL
	9617	MTRF1	mitochondrial translation release factor 1	0.0261469	9.41788	0.0549097	0.0359565	0.281729	0.000844653	0.234784	0.00671164	0.134331	0.0435987	MTRF1
	3481	IGF2	insulin like growth factor 2	0.0188789	10.0082	0.0197018	0.00949505	0.288136	8.15251e-05	0.296613	0.00671164	0.108651	0.0509547	IGF2
	6945	MLX	MAX dimerization protein MLX	0.0322071	10.0566	0.013009	0.0132721	0.0566955	0.000432325	0.246133	0.00670996	0.111966	0.00793243	MLX
	51182	HSPA14	heat shock protein family A (Hsp70) member 14	0.0639721	23.287	0.167616	0.0210725	0.0720232	0.000343692	0.266319	0.0067093	0.143251	6.85216e-06	HSPA14
	286410	ATP11C	ATPase phospholipid transporting 11C	0.0152887	9.16774	0.166283	0.00432864	0.0959366	0.0146859	0.249557	0.00669086	2.12286	5.25616e-14	ATP11C
	90957	DHX57	DExH-box helicase 57	0.0110499	24.1666	0.0227432	0.0396491	0.119359	0.00246788	0.233792	0.00668316	0.109094	7.88606e-08	DHX57
	51126	NAA20	N-alpha-acetyltransferase 20, NatB catalytic subunit	0.0102127	26.3661	0.182599	0.0228821	0.0570643	0.007504	0.243118	0.00666252	0.298294	0.0125015	NAA20
	2887	GRB10	growth factor receptor bound protein 10	0.0181564	3.40878	0.111083	0.015437	0.248583	1.00462e-07	0.290425	0.00661708	2.00673	3.29539e-12	GRB10
	203245	NAIF1	nuclear apoptosis inducing factor 1	0.0232742	15.2591	0.148834	0.0272932	0.0205221	0.000668721	0.246388	0.00659654	0.259622	0.0369362	NAIF1
	57568	SIPA1L2	signal induced proliferation associated 1 like 2	0.0229172	7.14651	0.136358	0.00406708	0.0298523	0.00693276	0.27076	0.00659654	1.0371	0.000502446	SIPA1L2
	84240	ZCCHC9	zinc finger CCHC-type containing 9	0.0193633	3.55885	0.0834164	0.0133295	0.0829175	0.000129903	0.227476	0.00659654	0.428725	0.0157677	ZCCHC9
	9179	AP4M1	adaptor related protein complex 4 subunit mu 1	0.0983445	18.3858	0.155125	0.0172883	0.0214026	0.00247113	0.248732	0.00659654	0.134559	0.0180543	AP4M1
	25879	DCAF13	DDB1 and CUL4 associated factor 13	0.018743	65.9915	0.0387339	0.0279407	0.07066	0.0147059	0.231433	0.00659594	0.109258	3.86373e-06	DCAF13
	10208	USPL1	ubiquitin specific peptidase like 1	0.0117305	5.67319	0.0895463	0.0142205	0.0537705	0.000186197	0.228565	0.00658918	0.447817	0.000711999	USPL1
	55238	SLC38A7	solute carrier family 38 member 7	0.0112596	4.00153	0.12839	0.0384189	0.0724308	0.000821427	0.236922	0.00657338	0.109879	1.32639e-06	SLC38A7
	10910	SUGT1	SGT1 homolog, MIS12 kinetochore complex assembly cochaperone	0.0491079	6.36292	0.0179879	0.00271251	0.0783987	0.00384816	0.240083	0.00657338	0.152718	0.0431937	SUGT1
	55832	CAND1	cullin associated and neddylation dissociated 1	0.0244298	3.33305	0.011046	0.00282836	0.118969	0.00485721	0.226064	0.00655691	0.112676	0.03272	CAND1
	7756	ZNF207	zinc finger protein 207	0.0462748	10.0063	0.0106841	0.0139486	0.264221	7.04837e-06	0.224325	0.00653203	0.114708	0.0703709	ZNF207
	1639	DCTN1	dynactin subunit 1	0.0356491	9.0411	0.0834796	0.0143343	0.0628759	0.00769	0.262843	0.00653203	0.131681	0.000195579	DCTN1
	1616	DAXX	death domain associated protein	0.0557057	9.67776	0.164394	0.00254707	0.0798044	0.000697058	0.253209	0.00653203	0.143853	3.16485e-09	DAXX
	55689	YEATS2	YEATS domain containing 2	0.0102869	23.3479	0.0525827	0.00682726	0.0367675	0.000394456	0.0316564	0.00650882	0.166522	1.63739e-09
	283643	TEDC1	tubulin epsilon and delta complex 1	0.0168443	11.8417	0.0130855	0.0317449	0.116162	0.00631488	0.23119	0.00648298	0.109025	0.000101357	TEDC1
	84328	LZIC	leucine zipper and CTNNBIP1 domain containing	0.0558103	6.38903	0.0188969	0.00891299	0.0626096	0.00602429	0.277155	0.00646441	0.197838	0.0107177	LZIC
	6045	RNF2	ring finger protein 2	0.0828514	10.2103	0.019611	0.0355516	0.0460454	0.000850618	0.244441	0.006459	0.134196	0.00122602	RNF2
	55743	CHFR	checkpoint with forkhead and ring finger domains	0.0366872	7.15597	0.216946	0.0134778	0.022501	0.0146369	0.252421	0.006459	0.136829	0.000206614	CHFR
	54880	BCOR	BCL6 corepressor	0.0519445	2.58289	0.169712	0.0030664	0.0951409	0.000468911	0.246742	0.00645309	0.143213	0.00617982	BCOR
	10955	SERINC3	serine incorporator 3	0.0653198	12.8491	0.139681	0.00362891	0.119131	0.000214981	0.241651	0.00645042	0.221214	0.0146985	SERINC3
	9451	EIF2AK3	eukaryotic translation initiation factor 2 alpha kinase 3	0.0297413	7.77194	0.0171661	0.00252292	0.0215039	0.00202877	0.210123	0.00643009	0.143098	0.000703965	EIF2AK3
	122961	ISCA2	iron-sulfur cluster assembly 2	0.0213811	4.30809	0.154831	0.00974916	0.235597	0.000181036	0.241965	0.00641752	0.415482	0.0022025	ISCA2
	55129	ANO10	anoctamin 10	0.0216457	10.415	0.0181865	0.000233632	0.048686	0.00701109	0.257479	0.00640583	0.916973	1.0073e-10	ANO10
	643836	ZFP62	ZFP62 zinc finger protein	0.0243096	4.37401	0.0907399	0.0309443	0.0748119	0.00147661	0.232298	0.0064	0.11033	0.0099322	ZFP62
	26502	NARF	nuclear prelamin A recognition factor	0.0107044	15.073	0.136884	0.0136868	0.029142	0.00033306	0.255055	0.00637646	0.243805	0.0614964	NARF
	55692	LUC7L	LUC7 like	0.0502652	3.94047	0.0339438	0.0126758	0.0697548	0.000253573	0.230723	0.00636776	0.269348	0.0331326	LUC7L
	4007	PRICKLE3	prickle planar cell polarity protein 3	0.0295001	15.5076	0.060134	0.0183081	0.0590225	0.000223622	0.224488	0.00634008	0.413037	0.0112807	PRICKLE3
	154467	CCDC167	coiled-coil domain containing 167	0.0176865	24.0702	0.052505	0.00611628	0.236408	0.00240579	0.250953	0.00631199	0.13565	0.0127863	CCDC167
	3204	HOXA7	homeobox A7	0.0283277	8.3459	0.0203375	0.00455927	0.0203113	0.000572934	0.238392	0.00630563	1.06495	0.0473373	HOXA7
	10565	ARFGEF1	ADP ribosylation factor guanine nucleotide exchange factor 1	0.0565964	5.14732	0.153968	0.0131389	0.113077	0.00556817	0.236554	0.00630298	0.112268	0.0213033	ARFGEF1
	4905	NSF	N-ethylmaleimide sensitive factor, vesicle fusing ATPase	0.0121828	5.81523	0.0604002	0.016928	0.0958585	0.00311896	0.237685	0.00629379	0.233988	0.0129695	NSF
	1820	ARID3A	AT-rich interaction domain 3A	0.230544	25.4778	0.116532	0.0117439	0.0838225	0.00240867	0.257066	0.00624942	0.10674	9.71019e-10	ARID3A
	55759	WDR12	WD repeat domain 12	0.0111979	17.7239	0.201542	0.00179213	0.0776916	0.000237365	0.275944	0.00624013	0.148589	0.00996153	WDR12
	6827	SUPT4H1	SPT4 homolog, DSIF elongation factor subunit	0.0523313	4.86007	0.0523313	0.00882028	0.253182	0.000138965	0.233415	0.00621914	0.134821	0.000299531	SUPT4H1
	29926	GMPPA	GDP-mannose pyrophosphorylase A	0.0881352	2.78555	0.161049	0.0333452	0.0433662	0.00144748	0.246426	0.00621167	1.12124	4.64587e-13	GMPPA
	3015	H2AZ1	H2A.Z variant histone 1	0.0138708	29.3492	0.0338599	0.0268238	0.242436	1.10106e-06	0.253367	0.00621167	0.243078	0.0320798	H2AZ1
	10916	MAGED2	MAGE family member D2	0.0190495	31.224	0.0188969	0.0130567	0.267833	0.00142733	0.283889	0.00621167	0.28435	0.0518587	MAGED2
	4289	MKLN1	muskelin 1	0.0181652	2.97236	0.17749	0.00938911	0.273922	0.000139525	0.242468	0.00621167	0.130567	0.0011243	MKLN1
	7165	TPD52L2	TPD52 like 2	0.0166186	59.5754	0.149315	0.00990856	0.0607616	0.0001855	0.233499	0.00621167	0.128764	0.00835033	TPD52L2
	5210	PFKFB4	6-phosphofructo-2-kinase/fructose-2,6-biphosphatase 4	0.0118046	7.07469	0.111513	0.023988	0.0502317	0.00753	0.241555	0.00620141	0.109877	4.49757e-07	PFKFB4
	7138	TNNT1	troponin T1, slow skeletal type	0.465771	21.5738	0.171131	0.0131667	0.0439507	1.4913e-05	0.233532	0.00619915	2.75686	0.00187264	TNNT1
	10193	RNF41	ring finger protein 41	0.0763684	2.93894	0.0920953	0.0095306	0.247982	0.000459962	0.243559	0.00618651	0.114656	0.0296475	RNF41
	3006	H1-2	H1.2 linker histone, cluster member	0.0169561	4.1951	0.219629	0.0112389	0.0620879	0.000166876	0.211869	0.00617866	0.138929	0.0730569	H1-2
	84296	GINS4	GINS complex subunit 4	0.0309437	36.299	0.141292	0.0157765	0.270533	0.00649984	0.253545	0.00617407	0.141015	0.00850592	GINS4
	51360	MBTPS2	membrane bound transcription factor peptidase, site 2	0.0838488	8.06997	0.145	0.0157765	0.0619434	0.000865293	0.250341	0.0061564	0.112637	0.0488242	MBTPS2
	29074	MRPL18	mitochondrial ribosomal protein L18	0.0323509	2.93784	0.151021	0.00137282	0.0848287	0.0078156	0.237398	0.00615252	0.143046	7.01791e-06	MRPL18
	6788	STK3	serine/threonine kinase 3	0.0485353	12.5639	0.152025	0.00461275	0.0420257	0.00070533	0.240376	0.00615123	0.108706	6.31418e-11	STK3
	9761	MLEC	malectin	0.0482022	7.74445	0.246191	9.25346e-06	0.0231961	0.00242965	0.24518	0.00614945	0.285538	0.0133754	MLEC
	56180	MOSPD1	motile sperm domain containing 1	0.0612867	25.2695	0.174857	0.0267902	0.125068	3.85643e-07	0.256861	0.00613732	1.23977	1.16634e-08	MOSPD1
	54543	TOMM7	translocase of outer mitochondrial membrane 7	0.0850129	10.0111	0.146161	0.034248	0.0492927	0.00037153	0.242228	0.00613374	0.225689	0.0303467	TOMM7
	3720	JARID2	jumonji and AT-rich interaction domain containing 2	0.0123576	17.9193	0.153284	0.0332647	0.01441	0.00561112	0.290242	0.00611167	0.11997	0.0667638	JARID2
	1716	DGUOK	deoxyguanosine kinase	0.0109012	11.5552	0.0253217	0.00438028	0.27743	0.000312448	0.284721	0.00610329	0.133053	0.000314824	DGUOK
	256643	BCLAF3	BCLAF1 and THRAP3 family member 3	0.013794	2.4193	0.0696124	0.0279384	0.0564406	0.000253372	0.261709	0.00610188	0.130305	0.00784479	BCLAF3
	54742	LY6K	lymphocyte antigen 6 family member K	0.288522	7.26601	0.0221799	0.0136658	0.237053	0.000506933	0.227482	0.00608022	1.98383	2.44596e-07	LY6K
	56474	CTPS2	CTP synthase 2	0.0126866	25.4075	0.177196	0.00953689	0.0742984	0.0140291	0.238412	0.00607826	0.41033	0.0355388	CTPS2
	28985	MCTS1	MCTS1 re-initiation and release factor	0.0103139	26.7373	0.166811	0.0350564	0.0207274	0.000123133	0.248292	0.00607463	0.921823	6.47765e-11	MCTS1
	252839	TMEM9	transmembrane protein 9	0.0509491	10.0319	0.0195145	0.000764545	0.187832	0.00633456	0.251803	0.00606991	0.108469	0.00121115	TMEM9
	55171	TBCCD1	TBCC domain containing 1	0.0106154	6.60419	0.0129194	0.0357306	0.24573	0.0143697	0.258486	0.00605667	0.29631	0.0150567	TBCCD1
	51693	TRAPPC2L	trafficking protein particle complex subunit 2L	0.0152521	3.21376	0.0100131	0.00958915	0.2754	4.60467e-06	0.260544	0.00605667	0.436119	0.000302897	TRAPPC2L
	1479	CSTF3	cleavage stimulation factor subunit 3	0.0613386	12.2779	0.0213059	0.03926	0.253677	0.000567596	0.252685	0.00605354	0.116655	0.00641879	CSTF3
	129531	MITD1	microtubule interacting and trafficking domain containing 1	0.0919181	4.96097	0.140691	0.00492303	0.0416493	0.00134406	0.266787	0.00605354	0.133508	0.00735923	MITD1
	254048	UBN2	ubinuclein 2	0.0539426	4.14648	0.149051	0.00295542	0.247177	0.00701382	0.260308	0.00604663	0.240986	0.0122259	UBN2
	55330	BLOC1S4	biogenesis of lysosomal organelles complex 1 subunit 4	0.0254451	3.54739	0.12287	0.00634797	0.247038	0.000170673	0.258621	0.00604663	0.106457	1.92486e-07	BLOC1S4
	91012	CERS5	ceramide synthase 5	0.0396464	13.1895	0.164742	0.0221069	0.255132	0.00063104	0.291034	0.00604483	1.14976	2.57367e-09	CERS5
	4521	NUDT1	nudix hydrolase 1	0.271988	27.6056	0.168266	0.0326426	0.066361	0.000247851	0.275279	0.0060387	0.136174	0.0145171	NUDT1
	116064	LRRC58	leucine rich repeat containing 58	0.0139322	2.92678	0.162357	0.0245754	0.267922	0.000113237	0.245163	0.00603616	0.132674	0.00852214	LRRC58
	9270	ITGB1BP1	integrin subunit beta 1 binding protein 1	0.02943	13.6831	0.14019	0.00136375	0.0522852	0.0001587	0.24736	0.00603208	0.106116	9.28072e-08	ITGB1BP1
	3299	HSF4	heat shock transcription factor 4	0.0826944	3.01299	0.213768	0.00205528	0.0615326	0.00288343	0.26611	0.00603208	0.134656	0.0132943	HSF4
	140465	MYL6B	myosin light chain 6B	0.0165099	8.79003	0.0104645	0.0195467	0.0626563	0.00296074	0.262209	0.00602484	0.109419	0.000415266	MYL6B
	84826	SFT2D3	SFT2 domain containing 3	0.030984	24.9429	0.021148	0.0187392	0.0762949	0.00722185	0.269494	0.00602484	0.135527	0.0349852	SFT2D3
	387103	CENPW	centromere protein W	0.255918	31.7153	0.229204	0.0245376	0.0499727	0.000666756	0.24818	0.00602484	0.137869	0.0079311	CENPW
	79576	NKAP	NFKB activating protein	0.0739367	38.608	0.0227987	0.037828	0.133949	0.00499047	0.210474	0.00602484	0.485104	0.000151809	NKAP
	65009	NDRG4	NDRG family member 4	0.232084	17.5774	0.0926414	0.0385401	0.299059	0.00778	0.286456	0.00602484	0.108649	0.0306606	NDRG4
	5610	EIF2AK2	eukaryotic translation initiation factor 2 alpha kinase 2	0.0981848	9.24145	0.194408	0.0246519	0.0789393	0.00723804	0.211394	0.00602484	0.908841	4.42935e-09	EIF2AK2
	127495	LRRC39	leucine rich repeat containing 39	0.0115283	4.2337	0.0244322	0.0330647	0.276949	0.000265815	0.285037	0.00602484	1.78481	0.000952966	LRRC39
	11020	IFT27	intraflagellar transport 27	0.0862869	5.1538	0.0104086	0.0292939	0.0700058	0.000293764	0.211091	0.00602484	0.112411	0.0093933	IFT27
	729920	CRPPA	CDP-L-ribitol pyrophosphorylase A	0.0296832	3.42843	0.147334	0.0274922	0.0977495	0.00642583	0.28992	0.00602484	1.5968	4.56981e-11	CRPPA
	63982	ANO3	anoctamin 3	0.0151951	6.96965	0.0823086	0.00921153	0.295458	0.00647195	0.280361	0.00602484	1.12807	0.0327562	ANO3
	339287	MSL1	MSL complex subunit 1	0.055204	16.342	0.166603	0.0138825	0.253584	0.00463945	0.255907	0.00602484	0.437581	9.71924e-07	MSL1
	5716	PSMD10	proteasome 26S subunit, non-ATPase 10	0.0607684	17.928	0.0300948	0.0184149	0.129898	0.00411486	0.264558	0.00602484	0.109485	2.16443e-08	PSMD10
	51594	NBAS	NBAS subunit of NRZ tethering complex	0.0301391	2.24172	0.082843	0.0128426	0.0796863	0.00596572	0.246493	0.00602484	0.133328	0.000213417	NBAS
	6556	SLC11A1	solute carrier family 11 member 1	0.0124031	7.02387	0.131712	0.000304617	0.117272	0.000149005	0.231005	0.00602484	2.09286	1.44514e-06	SLC11A1
	79035	NABP2	nucleic acid binding protein 2	0.0136962	18.8245	0.136962	0.0158365	0.0718728	0.000318805	0.241007	0.00602484	0.134327	0.0503526	NABP2
	7542	ZFPL1	zinc finger protein like 1	0.0118525	10.0063	0.126332	0.0324128	0.0493742	0.00684038	0.270871	0.00602422	0.116249	0.0191858	ZFPL1
	26017	FAM32A	family with sequence similarity 32 member A	0.0452005	13.4052	0.178274	0.0253028	0.0465751	0.0073856	0.266009	0.00601939	0.196913	0.0181031	FAM32A
	25953	PNKD	PNKD metallo-beta-lactamase domain containing	0.0520575	8.59425	0.169908	0.00407681	0.116449	0.000716169	0.266641	0.00600803	1.84059	9.02454e-11	PNKD
	*	Cancer cells
	**	Mouse decidua MSC
	***	Cardiac intersticial MSC
	****	Bone marrow MSC
	*****	Human decidua MSC
