# Supplementary material for: Polyploidy Promotes Hypertranscription, Apoptosis Resistance, and Ciliogenesis in Cancer Cells and Mesenchymal Stem Cells of Various Origins: Comparative Transcriptome In Silico Study
Source: Int J Mol Sci. 2024 Apr 10;25(8):4185. doi: 10.3390/ijms25084185 (PMC11050069; doi:10.3390/ijms25084185)
Supplement: Supplementary file 1 [file ijms-25-04185-s001.zip › Supplementary Table S2_113 PIEA_OK(1).xlsx]

## Sheet: Лист1
	Supplementary Table S2. Consensus ploidy -upregulated master regulators in polyploid vs diploid cancer and MSC cells (113 gene set ), identified by PIEA
	NCBIid	Symb	Pway_comment	n_sample	fract_ratio	qvalue	LL_IDs
	3015	H2AZ1	H2A.Z variant histone 1	23	8.031	3.976e-11	865; 1616; 3006; 3720; 5914; 6045; 6601; 6880; 7994; 8295; 9282; 10001; 10014; 10467; 10902; 10951; 11222; 23476; 29115; 51111; 55257; 57634; 83933
	22897	CEP164	centrosomal protein 164	12	20.0193	1.35e-09	1069; 5147; 9696; 23322; 27241; 54903; 55835; 91147; 116840; 134359; 145508; 201255
	10902	BRD8	bromodomain containing 8	10	22.3188	1.947e-08	3015; 8295; 10467; 23476; 55257; 55689; 57634; 93973; 94239; 339287
	57634	EP400	E1A binding protein p400	12	14.7904	2.468e-08	3006; 3015; 7994; 8295; 10467; 10902; 23476; 55257; 55689; 93973; 94239; 339287
	8295	TRRAP	transformation/transcription domain associated protein	14	9.96651	7.906e-08	3015; 6880; 7994; 9282; 10467; 10902; 23476; 55257; 55636; 55689; 57634; 93973; 94239; 339287
	94239	H2AZ2	H2A.Z variant histone 2	15	7.83984	3.125e-07	865; 1616; 3720; 5914; 6045; 8295; 10014; 10467; 10902; 11222; 23476; 29115; 55257; 57634; 83933
	23476	BRD4	bromodomain containing 4	18	5.63043	9.626e-07	988; 1616; 3006; 3015; 5610; 6045; 6426; 6601; 7994; 8295; 8886; 9282; 10902; 23481; 25962; 51111; 57634; 94239
	55257	MRGBP	MRG domain binding protein	8	21.6602	1.039e-06	3015; 8295; 10467; 10902; 55689; 57634; 94239; 339287
	10467	ZNHIT1	zinc finger HIT-type containing 1	7	24.0857	3.552e-06	3015; 8295; 10902; 55257; 57634; 93973; 94239
	9696	CROCC	ciliary rootlet coiled-coil, rootletin	7	22.6689	5.216e-06	6827; 9282; 10001; 22897; 55835; 116840; 201255
	116840	CNTROB	centrobin, centriole duplication and spindle assembly protein	6	24.1697	2.581e-05	1069; 9696; 22897; 55835; 134359; 152185
	339287	MSL1	MSL complex subunit 1	6	20.2236	5.801e-05	7994; 8295; 10902; 55257; 55689; 57634
	6426	SRSF1	serine and arginine rich splicing factor 1	13	5.39465	9.464e-05	988; 1479; 2332; 7072; 9129; 10262; 10644; 10951; 23435; 23476; 51319; 55110; 55692
	134359	POC5	POC5 centriolar protein	6	18.351	9.468e-05	1069; 22897; 55835; 116840; 152185; 197335
	55835	CENPJ	centromere protein J	7	13.1377	0.000107	1069; 9696; 22897; 116840; 121441; 134359; 152185
	55689	YEATS2	YEATS domain containing 2	7	12.0429	0.0001682	6880; 7994; 8295; 10902; 55257; 57634; 339287
	988	CDC5L	cell division cycle 5 like	11	5.9371	0.0002106	1479; 6426; 9129; 10262; 23435; 23476; 26017; 29101; 55110; 58509; 79576
	7994	KAT6A	lysine acetyltransferase 6A	7	10.2311	0.0004015	865; 3015; 8295; 23476; 55689; 57634; 339287
	25962	VIRMA	vir like m6A methyltransferase associated	6	11.9392	0.0006754	2332; 5052; 10643; 10644; 23476; 253943
	27241	BBS9	Bardet-Biedl syndrome 9	5	16.1921	0.0008074	11020; 22897; 23322; 54903; 91147
	2332	FMR1	fragile X messenger ribonucleoprotein 1	9	6.21939	0.00085	4137; 6426; 7072; 8575; 10643; 10644; 23435; 25962; 253943
	10644	IGF2BP2	insulin like growth factor 2 mRNA binding protein 2	6	11.0106	0.0009868	2332; 3481; 6426; 10643; 25962; 253943
	55110	MAGOHB	mago homolog B, exon junction complex subunit	8	6.5735	0.001476	988; 6426; 9129; 10262; 26017; 57122; 58509; 79576
	7072	TIA1	TIA1 cytotoxic granule associated RNA binding protein	7	7.75916	0.001607	1479; 2332; 4137; 5610; 6426; 23435; 55692
	9371	KIF3B	kinesin family member 3B	6	9.34864	0.00201	1639; 11020; 51594; 55605; 60561; 90990
	54903	MKS1	MKS transition zone complex subunit 1	5	12.7046	0.002038	11020; 22897; 23322; 27241; 91147
	60561	RINT1	RAD50 interactor 1	6	9.17552	0.002155	4905; 9371; 51542; 51594; 55605; 90990
	93973	ACTR8	actin related protein 8	4	17.8551	0.002916	8295; 10467; 10902; 57634
	6045	RNF2	ring finger protein 2	8	5.575	0.00379	865; 3015; 3720; 6880; 10014; 10951; 23476; 94239
	10643	IGF2BP3	insulin like growth factor 2 mRNA binding protein 3	5	10.5871	0.004188	2332; 3481; 10644; 25962; 253943
	79576	NKAP	NFKB activating protein	5	10.195	0.004834	988; 9129; 26017; 55110; 58509
	9129	PRPF3	pre-mRNA processing factor 3	7	6.21567	0.005031	988; 6426; 10262; 10285; 55110; 55692; 79576
	55692	LUC7L	LUC7 like	5	9.94935	0.005261	6426; 7072; 9129; 10262; 51319
	6880	TAF9	TATA-box binding protein associated factor 9	7	6.02143	0.005773	3015; 6045; 6827; 8295; 9282; 10001; 55689
	23322	RPGRIP1L	RPGRIP1 like	5	9.07469	0.007432	5147; 22897; 27241; 54903; 91147
	9282	MED14	mediator complex subunit 14	7	5.55825	0.008572	3015; 6880; 8295; 9696; 10001; 23097; 23476
	201255	LRRC45	leucine rich repeat containing 45	3	22.5217	0.009251	9696; 22897; 121441
	253943	YTHDF3	YTH N6-methyladenosine RNA binding protein F3	4	12.0116	0.01011	2332; 10643; 10644; 25962
	26017	FAM32A	family with sequence similarity 32 member A	4	11.7971	0.01068	988; 55110; 58509; 79576
	1479	CSTF3	cleavage stimulation factor subunit 3	5	8.1762	0.01074	988; 6426; 7072; 29101; 64895
	1069	CETN2	centrin 2	6	6.19347	0.0122	6119; 22897; 55835; 116840; 134359; 197335
	8886	DDX18	DEAD-box helicase 18	7	5.13829	0.01249	11222; 23029; 23476; 23481; 25879; 55759; 87178
	1639	DCTN1	dynactin subunit 1	7	4.75768	0.01832	4137; 9371; 10466; 23435; 29115; 60412; 145508
	152185	SPICE1	spindle and centriole associated protein 1	3	17.0854	0.01842	55835; 116840; 134359
	10262	SF3B4	splicing factor 3b subunit 4	6	5.59862	0.01895	988; 6426; 9129; 10285; 55110; 55692
	51594	NBAS	NBAS subunit of NRZ tethering complex	4	9.43767	0.02139	4905; 9371; 55605; 60561
	91147	TMEM67	transmembrane protein 67	4	9.17552	0.02313	22897; 23322; 27241; 54903
	23097	CDK19	cyclin dependent kinase 19	4	9.04982	0.02414	4848; 9282; 10001; 81669
	55605	KIF21A	kinesin family member 21A	4	9.04982	0.02414	9371; 51594; 60561; 90990
	865	CBFB	core-binding factor subunit beta	6	5.10802	0.02723	3015; 5914; 6045; 6601; 7994; 94239
	58509	CACTIN	cactin, spliceosome C complex subunit	4	8.5797	0.02802	988; 26017; 55110; 79576
	51542	VPS54	VPS54 subunit of GARP complex	4	8.5797	0.02802	4905; 10466; 60412; 60561
	10466	COG5	component of oligomeric golgi complex 5	4	7.95948	0.03513	1639; 4905; 9950; 51542
	23481	PES1	pescadillo ribosomal biogenesis factor 1	7	4.0004	0.03994	8886; 11222; 23029; 23476; 25879; 51319; 55759
	29101	SSU72	SSU72 homolog, RNA polymerase II CTD phosphatase	4	7.59353	0.04041	988; 1479; 6827; 64895
	10951	CBX1	chromobox 1	5	5.50531	0.04492	1616; 3015; 6045; 6426; 51111
	55759	WDR12	WD repeat domain 12	7	3.86661	0.04663	8886; 11222; 23029; 23481; 25879; 51319; 87178
	3006	H1-2	H1.2 linker histone, cluster member	4	6.95408	0.05196	3015; 4137; 23476; 57634
	10001	MED6	mediator complex subunit 6	5	4.97468	0.06256	3015; 6880; 9282; 9696; 23097
	10014	HDAC5	histone deacetylase 5	5	4.91546	0.06526	3015; 6045; 7534; 25855; 94239
	7534	YWHAZ	tyrosine 3-monooxygenase/tryptophan 5-monooxygenase activation protein zeta	7	3.56826	0.0653	1072; 3251; 3480; 4137; 5052; 6654; 10014
	4137	MAPT	microtubule associated protein tau	7	3.50338	0.06947	1072; 1639; 2332; 3006; 7072; 7534; 23435
	11020	IFT27	intraflagellar transport 27	3	9.34864	0.0708	9371; 27241; 54903
	51111	KMT5B	lysine methyltransferase 5B	3	9.17552	0.07287	3015; 10951; 23476
	29115	SAP30BP	SAP30 binding protein	3	8.84782	0.07886	1639; 3015; 94239
	87178	PNPT1	polyribonucleotide nucleotidyltransferase 1	5	4.46376	0.08499	5610; 8886; 11222; 55759; 64895
	11222	MRPL3	mitochondrial ribosomal protein L3	8	2.97584	0.08788	3015; 6742; 8886; 23481; 51319; 55759; 87178; 94239
	5052	PRDX1	peroxiredoxin 1	4	5.45981	0.09552	1072; 5687; 7534; 25962
	5610	EIF2AK2	eukaryotic translation initiation factor 2 alpha kinase 2	5	4.23485	0.09961	100; 7072; 8575; 23476; 87178
	4905	NSF	N-ethylmaleimide sensitive factor, vesicle fusing ATPase	5	4.19186	0.1033	9950; 10466; 51542; 51594; 60561
	51319	RSRC1	arginine and serine rich coiled-coil 1	6	3.52653	0.1062	6426; 11222; 23481; 25879; 55692; 55759
	90990	KIFC2	kinesin family member C2	3	7.50724	0.1084	9371; 55605; 60561
	3481	IGF2	insulin like growth factor 2	5	4.00872	0.01185	2887; 3480; 6654; 10643; 10644
	6601	SMARCC2	SWI/SNF related, matrix associated, actin dependent regulator of chromatin subfamily c member 2	4	4.61984	0.1476	865; 3015; 23476; 55636
	3251	HPRT1	hypoxanthine phosphoribosyltransferase 1	4	4.58776	0.1502	100; 5147; 7534; 197335
	64895	PAPOLG	poly(A) polymerase gamma	3	6.35228	0.1538	1479; 29101; 87178
	23435	TARDBP	TAR DNA binding protein	6	3.15591	0.1574	988; 1639; 2332; 4137; 6426; 7072
	5147	PDE6D	phosphodiesterase 6D	3	6.19347	0.162	3251; 22897; 23322
	145508	CEP128	centrosomal protein 128	2	11.3903	0.1678	1639; 22897
	55636	CHD7	chromodomain helicase DNA binding protein 7	3	5.63043	0.1989	6601; 6827; 8295
	197335	WDR90	WD repeat domain 90	3	5.38563	0.2179	1069; 3251; 134359
	6827	SUPT4H1	SPT4 homolog, DSIF elongation factor subunit	4	3.9091	0.012269	6880; 9696; 29101; 55636
	25879	DCAF13	DDB1 and CUL4 associated factor 13	5	3.23842	0.012269	8886; 23481; 51319; 55759; 55832
	1616	DAXX	death domain associated protein	4	3.38788	0.103191	3015; 10951; 23476; 94239
	10285	SMNDC1	survival motor neuron domain containing 1	2	7.02805	0.103352	9129; 10262
	3720	JARID2	jumonji and AT-rich interaction domain containing 2	3	3.84091	0.104067	3015; 6045; 94239
	9950	GOLGA5	golgin A5	2	6.00579	0.104067	4905; 10466
	23029	RBM34	RNA binding motif protein 34	3	3.78227	0.104162	8886; 23481; 55759
	121441	NEDD1	NEDD1 gamma-tubulin ring complex targeting factor	2	5.59862	0.104423	55835; 201255
	25855	BRMS1	BRMS1 transcriptional repressor and anoikis regulator	2	5.50531	0.104538	10014; 80312
	57122	NUP107	nucleoporin 107	2	2.33193	0.11425	55110; 3481
	81669	CCNL2	cyclin L2	2	2.04531	0.11425	23097; 3015
	55832	CAND1	cullin associated and neddylation dissociated 1	2	2.00707	0.11425	4905; 10466
	8575	PRKRA	protein activator of interferon induced protein kinase EIF2AK2	2	4.65237	0.105158	2332; 5610
	2887	GRB10	growth factor receptor bound protein 10	2	4.58776	0.105606	3480; 3481
	6742	SSBP1	single stranded DNA binding protein 1	3	3.03974	0.105903	6119; 11222; 79035
	6654	SOS1	SOS Ras/Rac guanine nucleotide exchange factor 1	4	2.4559	0.106132	3480; 3481; 5062; 7534
	83933	HDAC10	histone deacetylase 10	2	4.02828	0.106466	3015; 94239
	100	ADA	adenosine deaminase	2	3.93236	0.106661	3251; 5610
	4848	CNOT2	CCR4-NOT transcription complex subunit 2	2	2.06449	0.1025	55835; 201255
	80312	TET1	tet methylcytosine dioxygenase 1	2	2.98987	0.1025	25855;5147;
	6119	RPA3	replication protein A3	2	2.44877	0.1025	1069; 6742
	60412	EXOC4	exocyst complex component 4	2	3.71144	0.107043	1639; 51542
	537	ATP6AP1	ATPase H+ transporting accessory protein 1	2	2.3869	0.11425	3015; 6052;
	25852	ARMC8	armadillo repeat containing 8	2	2.07541	0.115	55759; 64895
	5062	PAK2	p21 (RAC1) activated kinase 2	2	2.2169	0.01025	5687; 6654
	79035	NABP2	nucleic acid binding protein 2	2	7.50724	0.107983	3015; 6742;
	5914	RARA	retinoic acid receptor alpha	3	2.42881	0.108062	865; 3015; 94239
	1716	DGUOK	deoxyguanosine kinase	2	2.47537	0.115	23476; 94239
	3480	IGF1R	insulin like growth factor 1 receptor	4	2.07748	0.108089	2887; 3481; 6654; 7534
	5687	PSMA6	proteasome 20S subunit alpha 6	2	2.94305	0.11025	5052; 5062
	11267	SNF8	SNF8 subunit of ESCRT-II	2	2.42881	0.115	55605; 60561
	1072	CFL1	cofilin 1	3	2.37071	0.108327	4137; 5052; 7534
