# Supplementary material for: Polyploidy Promotes Hypertranscription, Apoptosis Resistance, and Ciliogenesis in Cancer Cells and Mesenchymal Stem Cells of Various Origins: Comparative Transcriptome In Silico Study
Source: Int J Mol Sci. 2024 Apr 10;25(8):4185. doi: 10.3390/ijms25084185 (PMC11050069; doi:10.3390/ijms25084185)
Supplement: Supplementary file 1 [file ijms-25-04185-s001.zip › Supplementary Table S3_Final_425_OK .xlsx]

## Sheet: Sheet1
	Supplementary Table S3. Consensus ploidy -downregulated genes in polyploid vs diploid cancer and MSC cells (425 gene set )
NCBIid	Symb	Annot	*Poly/Dip Lg2_FC cancer	*Lg10_FDR	** Poly/Dip logFC_decid	** adj_PVal	*** Poly/Dip log2 FC_Card_interst	***adjPVal_MM_card_interstit_ComBio19	****log2 FC_ Poly/Dip BM	****adjPVal for	*****log2 FC_trophoblast	adjPVal_for *****		Symb
6002	RGS12	regulator of G protein signaling 12	-0.157812	24.5246	-0.520221	0.010149	-0.0390959	0.0897995	-0.645707	0.0888211	-1.11235	1.1896e-07		RGS12
374659	HDDC3	HD domain containing 3	-0.0209833	5.76142	-0.113942	0.00335128	-0.203719	0.0458905	-0.541304	0.0807826	-0.579833	0.0104825		HDDC3
4832	NME3	NME/NM23 nucleoside diphosphate kinase 3	-0.602448	7.69115	-0.856247	0.00333479	-0.179848	0.0295003	-0.296545	0.0906168	-0.0121501	0.104168		NME3
10717	AP4B1	adaptor related protein complex 4 subunit beta 1	-0.613561	13.7727	-0.01307	0.00331544	-0.0976848	0.0497919	-0.581336	0.00797374	-0.132382	0.00340776		AP4B1
57658	CALCOCO1	calcium binding and coiled-coil domain 1	-0.145428	25.0263	-0.00564119	0.0986757	-0.0967489	0.062894	-0.1146	0.0894561	-0.142691	0.0124609		CALCOCO1
22882	ZHX2	zinc fingers and homeoboxes 2	-0.00766918	6.90361	-0.0124732	0.0982156	-0.210966	0.0270701	-0.169406	0.00797374	-0.96734	0.0373627		ZHX2
92342	METTL18	methyltransferase 18, RPL3 N3-histidine	-0.181305	4.81572	-0.987501	0.00325031	-0.0338064	0.0669735	-0.00381034	0.0824013	-0.627821	0.00418424		METTL18
54936	ADPRS	ADP-ribosylserine hydrolase	-0.144803	6.53574	-0.51533	0.0196891	-0.271632	0.00354469	-0.871852	0.0968611	-1.02602	2.70863e-11		ADPRS
1793	DOCK1	dedicator of cytokinesis 1	-0.100127	10.9497	-0.567973	0.0195378	-0.0652647	0.0205036	-0.176	0.0954647	-0.165128	0.0832318		DOCK1
149483	CCDC17	coiled-coil domain containing 17	-0.846462	6.71172	-0.566052	0.0195378	-0.0138465	0.0864958	-0.197338	0.0884106	-0.934551	0.00728072		CCDC17
341947	COX8C	cytochrome c oxidase subunit 8C	-0.20104	5.21457	-0.0134516	0.0968991	-0.123109	5.97413e-08	-0.163847	0.0859681	-0.405059	0.00327592		COX8C
9628	RGS6	regulator of G protein signaling 6	-0.00350628	5.60087	-0.0208803	0.0965796	-0.0924433	0.0562587	-0.130481	0.00797374	-3.01334	0.00254247		RGS6
91584	PLXNA4	plexin A4	-0.128896	12.5118	-0.0216202	0.0963903	-0.0939973	0.0610084	-0.15107	0.0887356	-1.03681	0.0984147		PLXNA4
114034	TOE1	target of EGR1, exonuclease	-0.400893	13.2377	-0.87713	0.00318991	-0.0295803	0.0903832	-0.208211	0.0931032	-1.71887	3.16351e-13		TOE1
10046	MAMLD1	mastermind like domain containing 1	-0.235082	8.14014	-0.670175	0.00193225	-0.167894	0.0177826	-0.178657	0.0928236	-1.02967	0.0833297		MAMLD1
26994	RNF11	ring finger protein 11	-0.122112	14.7323	-0.0177944	0.0958724	-0.107474	0.0101181	-0.440068	0.0847891	-0.192589	0.0266246		RNF11
23230	VPS13A	vacuolar protein sorting 13 homolog A	-0.910417	4.07917	-0.0421367	0.0954732	-0.512986	0.0295118	-0.551257	0.0943306	-1.30622	1.4498e-12		VPS13A
157285	PRAG1	PEAK1 related, kinase-activating pseudokinase 1	-0.122115	25.0297	-0.111094	0.00311581	-0.23475	0.0298343	-0.26864	0.00797374	-0.495576	0.0274851		PRAG1
7159	TP53BP2	tumor protein p53 binding protein 2	-0.0351796	10.4245	-0.0409671	0.0945966	-0.00775702	0.000953138	-0.171548	0.0942325	-0.501719	7.284e-07		TP53BP2
283987	HID1	HID1 domain containing	-0.944984	7.70784	-0.102454	0.00310939	-0.0181162	0.0905302	-0.201417	0.00797374	-4.11974	1.63625e-10		HID1
3685	ITGAV	integrin subunit alpha V	-0.163576	5.43132	-0.483147	0.0186942	-0.993869	0.00368209	-0.115198	0.0802484	-1.08992	4.85727e-10		ITGAV
6760	SS18	SS18 subunit of BAF chromatin remodeling complex	-0.596451	9.84667	-0.511654	0.0184641	-0.191383	2.84102e-11	-0.602958	0.00797374	-0.142866	2.12929e-07		SS18
57146	LDAF1	lipid droplet assembly factor 1	-0.1466	7.83613	-0.100665	0.00304128	-0.166282	0.000391683	-0.545655	0.0835229	-0.612688	0.105408		LDAF1
3899	AFF3	ALF transcription elongation factor 3	-0.00336543	22.5108	-0.0358703	0.0923812	-0.49035	0.0418019	-0.127112	0.0976149	-0.472304	0.0132468		AFF3
9967	THRAP3	thyroid hormone receptor associated protein 3	-0.436698	18.0457	-0.0304962	0.0923198	-0.107498	0.0497633	-0.127112	0.0938719	-0.166502	0.084894		THRAP3
1154	CISH	cytokine inducible SH2 containing protein	-0.00309939	22.8329	-0.120573	0.00300684	-0.0191848	0.094103	-0.12076	0.0802484	-0.91947	0.104492		CISH
113189	CHST14	carbohydrate sulfotransferase 14	-0.00307154	7.51491	-0.459202	0.0181656	-0.513316	0.0390767	-0.177966	0.0861244	-0.662683	1.72136e-09		CHST14
27013	CNPPD1	cyclin Pas1/PHO80 domain containing 1	-0.498743	12.4538	-0.0178068	0.0293702	-0.0295803	0.0411896	-0.968127	0.080191	-0.424259	0.000156992		CNPPD1
51441	YTHDF2	YTH N6-methyladenosine RNA binding protein F2	-0.0379475	6.0359	-0.0388836	0.0901437	-0.134113	0.000560462	-0.180342	0.0838855	-0.51545	3.49854e-08		YTHDF2
9946	CRYZL1	crystallin zeta like 1	-0.639624	12.9335	-0.0137222	0.0177378	-0.00781967	0.0196083	-0.182466	0.0903436	-0.15241	0.0995572		CRYZL1
961	CD47	CD47 molecule	-0.839181	18.5685	-0.0371869	0.0897797	-0.28869	2.05928e-10	-0.876044	0.00797374	-0.905206	8.10764e-09		CD47
9709	HERPUD1	homocysteine inducible ER protein with ubiquitin like domain 1	-0.15765	19.5064	-0.663317	0.017582	-0.289319	2.06899e-09	-0.648267	0.0802484	-0.295089	0.00303327		HERPUD1
51444	RNF138	ring finger protein 138	-0.269958	4.28155	-0.0660321	0.088401	-0.137235	0.0101702	-0.121246	0.00797374	-1.13912	1.73536e-10		RNF138
2098	ESD	esterase D	-0.00320827	16.179	-0.835113	0.0284692	-0.202783	0.00010592	-0.533777	0.0859654	-0.0478878	0.104452		ESD
23392	ECPAS	Ecm29 proteasome adaptor and scaffold	-0.00354655	10.8707	-0.0130003	0.0284306	-0.121758	9.67395e-06	-0.548283	0.0802484	-0.441667	2.05063e-07		ECPAS
5599	MAPK8	mitogen-activated protein kinase 8	-0.445919	1.80358	-0.811738	0.0283201	-0.130869	5.69926e-06	-0.115198	0.096926	-0.273821	0.0173097		MAPK8
3932	LCK	LCK proto-oncogene, Src family tyrosine kinase	-0.521548	48.0515	-0.162779	0.027487	-0.0119055	0.0959715	-0.671413	0.0822637	-0.51545	9.1999e-15		LCK
1742	DLG4	discs large MAGUK scaffold protein 4	-0.960516	8.22397	-0.967128	0.0271824	-0.467859	0.0233694	-0.933079	0.00797374	-2.02281	2.60316e-10		DLG4
25998	IBTK	inhibitor of Bruton tyrosine kinase	-0.114423	11.0056	-0.0131997	0.0271272	-0.209064	0.0411896	-0.192052	0.0895149	-0.15316	0.0205596		IBTK
29803	REPIN1	replication initiator 1	-0.0643405	13.9454	-0.0079077	0.027014	-0.130353	0.00324664	-0.947108	0.00797374	-0.55559	0.000429791		REPIN1
81563	C1orf21	chromosome 1 open reading frame 21	-0.152559	18.4674	-0.810211	0.0269887	-0.543492	0.0192814	-0.215909	0.00797374	-1.4338	1.99295e-09		C1orf21
6342	SCP2	sterol carrier protein 2	-0.178189	28.2339	-0.0074692	0.0267427	-0.836016	0.0124505	-0.493781	0.0813732	-0.0121114	0.0021525		SCP2
8531	YBX3	Y-box binding protein 3	-0.0514393	3.96867	-0.683732	0.0252428	-0.17562	1.0719e-06	-0.408293	0.0853059	-1.35213	3.76094e-09		YBX3
9895	TECPR2	tectonin beta-propeller repeat containing 2	-0.267134	9.50256	-0.11308	0.00797609	-0.0438067	0.0072396	-0.238155	0.0899029	-0.400466	0.10507		TECPR2
79594	MUL1	mitochondrial E3 ubiquitin protein ligase 1	-0.00351191	13.5657	-0.00730577	0.0150757	-0.228024	0.04825	-0.178657	0.0866084	-0.115111	0.0213048		MUL1
64393	ZMAT3	zinc finger matrin-type 3	-0.190451	13.6849	-0.110562	0.00786778	-0.188655	0.00331362	-0.107	0.0801951	-0.295066	1.8358e-06		ZMAT3
93517	SDR42E1	short chain dehydrogenase/reductase family 42E, member 1	-0.114221	9.59696	-0.18048	0.00784229	-0.0385271	0.00390837	-0.562194	0.00797374	-3.31229	1.97401e-06		SDR42E1
51099	ABHD5	abhydrolase domain containing 5, lysophosphatidic acid acyltransferase	-0.134443	26.9458	-0.00783407	0.024514	-0.0554644	0.0870773	-0.261931	0.0994411	-1.1284	1.82779e-10		ABHD5
91748	MIDEAS	mitotic deacetylase associated SANT domain protein	-0.140943	4.28485	-0.890815	0.024514	-0.921449	0.00197216	-0.119592	0.00797374	-0.418346	0.00685359		MIDEAS
308	ANXA5	annexin A5	-0.842252	8.66399	-0.0730928	0.00771233	-0.408059	2.04306e-18	-0.133061	0.0910471	-0.0075665	1.16218e-07		ANXA5
2140	EYA3	EYA transcriptional coactivator and phosphatase 3	-0.106767	6.70853	-0.646289	0.0238862	-0.0754735	0.0677873	-0.538924	0.00797374	-0.205746	0.0480254		EYA3
81603	TRIM8	tripartite motif containing 8	-0.60838	17.3601	-0.452258	0.014519	-0.20617	0.05133	-0.689424	0.00797374	-2.43446	1.75176e-12		TRIM8
50862	RNF141	ring finger protein 141	-0.116986	16.6339	-0.0175958	0.0237871	-0.00989734	0.0967467	-0.00741536	0.0805354	-0.161375	0.00764727		RNF141
9743	ARHGAP32	Rho GTPase activating protein 32	-0.141718	10.1115	-0.130349	0.00763042	-0.651269	0.0296837	-0.922745	0.00797374	-2.54305	1.15486e-15		ARHGAP32
7375	USP4	ubiquitin specific peptidase 4	-0.148302	9.51257	-0.0896005	0.00759045	-0.198616	0.056726	-0.116996	0.0802484	-0.00790672	0.00360344		USP4
7812	CSDE1	cold shock domain containing E1	-0.498979	8.87621	-0.0141696	0.0143677	-0.216386	4.85709e-06	-0.154401	0.0913552	-0.0145253	0.0106916		CSDE1
578	BAK1	BCL2 antagonist/killer 1	-0.0671153	19.7739	-0.0131211	0.0235594	-0.668311	0.0204376	-0.689855	0.0818978	-1.66722	2.03633e-11		BAK1
10363	HMG20A	high mobility group 20A	-0.961058	12.6096	-0.126212	0.00755315	-0.122756	0.0561015	-0.484784	0.0833853	-0.586241	8.81415e-08		HMG20A
1285	BAX	collagen type IV alpha 3 chain	-0.00330628	15.2075	-0.673709	0.0142742	-0.420445	0.089755	-0.520082	0.0963394	-1.1902	0.0446056		BAX
667	DST	dystonin	-0.107261	14.9748	-0.549673	0.01427	-0.138474	0.0139471	-0.253881	0.09395	-1.19452	8.25012e-09		DST
51573	GDE1	glycerophosphodiester phosphodiesterase 1	-0.0373143	8.04257	-0.183867	0.00752658	-0.164737	0.00014013	-0.263657	0.0910596	-0.103144	0.0232519		GDE1
8660	IRS2	insulin receptor substrate 2	-0.00877464	17.6444	-0.348	0.00749286	-0.287211	2.33943e-09	-0.281983	0.091905	-1.54409	0.00794916		IRS2
1958	EGR1	early growth response 1	-0.00313924	17.7904	-0.516466	0.00749286	-0.268747	3.2598e-08	-0.281983	0.00797374	-1.54409	5.24525e-07		EGR1
2892	GRIA3	glutamate ionotropic receptor AMPA type subunit 3	-0.165821	9.86499	-0.124302	0.0074742	-0.0219449	0.013473	-0.115643	0.0967924	-0.110265	0.100277		GRIA3
29799	YPEL1	yippee like 1	-0.0077354	9.58201	-0.171265	0.00746778	-0.156837	0.0880684	-0.184138	0.0956677	-1.53691	0.0027252		YPEL1
51465	UBE2J1	ubiquitin conjugating enzyme E2 J1	-0.132951	17.6489	-0.402889	0.0140702	-0.182	1.63096e-07	-0.494311	0.082599	-0.110975	0.028572		UBE2J1
80816	ASXL3	ASXL transcriptional regulator 3	-0.108649	9.34996	-0.11143	0.0074106	-0.0978282	0.0282855	-0.510607	0.00797374	-1.36005	0.104333		ASXL3
8775	NAPA	NSF attachment protein alpha	-0.273124	5.67042	-0.144523	0.00741028	-0.260851	8.26285e-10	-0.171051	0.0893431	-0.580165	2.2125e-08		NAPA
284207	METRNL	meteorin like, glial cell differentiation regulator	-0.00705995	8.02814	-0.194257	0.0229157	-0.0643263	4.04668e-24	-0.12076	0.0888303	-1.10195	0.000373224		METRNL
51097	SCCPDH	saccharopine dehydrogenase (putative)	-0.526111	4.13392	-0.917067	0.0228333	-0.0533061	0.0258104	-0.623121	0.0969475	-0.841962	0.00769749		SCCPDH
112616	CMTM7	CKLF like MARVEL transmembrane domain containing 7	-0.934852	7.63272	-0.20109	0.00731584	-0.145502	0.000249342	-0.448614	0.00797374	-1.70434	2.64581e-08		CMTM7
56997	COQ8A	coenzyme Q8A	-0.23104	14.6653	-0.119948	0.00725178	-0.0254988	0.0826078	-0.265174	0.0926456	-0.412158	0.00387483		COQ8A
64651	CSRNP1	cysteine and serine rich nuclear protein 1	-0.16281	18.4826	-0.1417	0.0135837	-0.066893	0.0229406	-0.194577	0.00797374	-0.228484	0.0107523		CSRNP1
5511	PPP1R8	protein phosphatase 1 regulatory subunit 8	-0.0542098	5.43409	-0.451075	0.0135521	-0.0693749	0.0834415	-0.124293	0.00797374	-0.122856	0.0842893		PPP1R8
8744	TNFSF9	TNF superfamily member 9	-0.142645	26.6896	-0.404918	0.00719231	-0.209252	0.0487715	-0.168927	0.00797374	-0.563999	0.0500031		TNFSF9
5029	P2RY2	purinergic receptor P2Y2	-0.24184	10.0079	-0.0140999	0.00708824	-0.134986	0.00703839	-0.172431	0.00797374	-4.77172	1.6834e-08		P2RY2
253461	ZBTB38	zinc finger and BTB domain containing 38	-0.104871	6.48111	-0.485592	0.01324	-0.21819	0.0521864	-0.986444	0.00798049	-0.169711	0.0144513		ZBTB38
573	BAG1	BAG cochaperone 1	-0.147104	15.4554	-0.895586	0.0214366	-0.299157	4.95022e-11	-0.270886	0.091905	-1.93885	9.1999e-15		BAG1
142679	DUSP19	dual specificity phosphatase 19	-0.133237	18.7413	-0.140356	0.0214222	-0.119034	0.0532016	-0.620341	0.0811087	-1.16899	0.00418539		DUSP19
1390	CREM	cAMP responsive element modulator	-0.404883	4.16878	-0.168625	0.0213286	-0.245705	0.00725453	-0.886296	0.0820139	-0.285965	4.76406e-08		CREM
58504	ARHGAP22	Rho GTPase activating protein 22	-0.186603	10.2991	-0.00729068	0.0213286	-0.129304	0.00362082	-0.108578	0.0803208	-3.5782	1.65561e-08		ARHGAP22
153020	RASGEF1B	RasGEF domain family member 1B	-0.29035	23.1933	-0.561307	0.0212834	-0.275712	0.0213892	-0.180842	0.0835404	-2.73708	2.41693e-11		RASGEF1B
23541	SEC14L2	SEC14 like lipid binding 2	-0.127734	14.7416	-0.105809	0.0211667	-0.0727684	0.00322404	-0.506543	0.00797374	-3.70843	1.96785e-10		SEC14L2
9219	MTA2	metastasis associated 1 family member 2	-0.247642	5.84468	-0.0156474	0.0127182	-0.0677791	0.0792766	-0.00735179	0.00797374	-0.487398	4.76088e-06		MTA2
329	BIRC2	baculoviral IAP repeat containing 2	-0.106585	3.01366	-0.136774	0.0782533	-0.599342	0.0623192	-0.00755249	0.0815166	-0.889636	0.0164085		BIRC2
114883	OSBPL9	oxysterol binding protein like 9	-0.0076648	4.94778	-0.818838	0.0207153	-0.122448	0.0826552	-0.132172	0.0936547	-0.244573	0.016246		OSBPL9
90507	SCRN2	secernin 2	-0.103269	5.93358	-0.142911	0.0760969	-0.0953312	0.0569968	-0.579597	0.0847787	-1.70532	3.52977e-10		SCRN2
64860	ARMCX5	armadillo repeat containing X-linked 5	-0.137253	9.77729	-0.00324833	0.0758811	-0.0279622	0.014065	-0.600347	0.00797374	-0.142691	0.0859805		ARMCX5
6609	SMPD1	sphingomyelin phosphodiesterase 1	-0.168281	20.5768	-0.146758	0.0198757	-0.210312	0.047596	-0.146749	0.0954842	-0.847346	0.00191148		SMPD1
55090	MED9	mediator complex subunit 9	-0.206846	6.91339	-0.650085	0.0121117	-0.211696	0.0478747	-0.525032	0.080387	-0.296889	0.0469615		MED9
51028	VPS36	vacuolar protein sorting 36 homolog	-0.472773	21.6154	-0.155719	0.0754516	-0.123213	0.0486543	-0.138542	0.0953984	-0.0121815	0.00618415		VPS36
55108	BSDC1	BSD domain containing 1	-0.636123	6.75653	-0.147229	0.0754341	-0.0304853	0.00314906	-0.573982	0.00797374	-0.622493	6.38418e-08		BSDC1
56267	KYAT3	kynurenine aminotransferase 3	-0.166795	21.2305	-0.616459	0.0119201	-0.403756	0.0120769	-0.637417	0.0860503	-0.510557	0.0188156		KYAT3
56255	TMX4	thioredoxin related transmembrane protein 4	-0.142773	5.21806	-0.160294	0.064424	-0.11109	0.057924	-0.455242	0.088572	-1.45059	1.14079e-06		TMX4
23154	NCDN	neurochondrin	-0.597142	5.31932	-0.00745007	0.0118618	-0.296758	0.0077377	-0.931523	0.00797374	-0.885923	1.02119e-07		NCDN
8726	EED	embryonic ectoderm development	-0.247309	7.08965	-0.913974	0.0192247	-0.875761	0.0137955	-0.115198	0.0848302	-0.615414	0.000121608		EED
81873	ARPC5L	actin related protein 2/3 complex subunit 5 like	-0.00399414	10.473	-0.179387	0.0636971	-0.199578	1.14149e-08	-0.117122	0.0987085	-0.278567	0.0160018		ARPC5L
56977	STOX2	storkhead box 2	-0.180181	6.90065	-0.592337	0.0117115	-0.201542	0.05843	-0.89039	0.0807634	-0.0123283	0.0208865		STOX2
5101	PCDH9	protocadherin 9	-0.253164	12.4447	-0.0140374	0.0633985	-0.172109	2.07509e-09	-0.457791	0.00797374	-0.995446	0.0942106		PCDH9
6256	RXRA	retinoid X receptor alpha	-0.489328	4.03849	-0.450595	0.0115069	-0.0215471	0.0158122	-0.152967	0.0979779	-0.126906	0.084101		RXRA
64921	CASD1	CAS1 domain containing 1	-0.00342271	6.16928	-0.0175157	0.0185743	-0.229543	0.00313331	-0.960071	0.0957039	-0.691264	1.47844e-06		CASD1
10663	CXCR6	C-X-C motif chemokine receptor 6	-0.538702	45.2029	-0.175113	0.0113279	-0.0308885	0.0234325	-0.180342	0.087093	-2.66121	1.67492e-11		CXCR6
55652	SLC48A1	solute carrier family 48 member 1	-0.572363	12.0894	-0.561258	0.0113279	-0.860927	0.0567355	-0.194071	0.0936628	-1.53255	1.34036e-07		SLC48A1
5932	RBBP8	RB binding protein 8, endonuclease	-0.00772249	4.22318	-0.578224	0.0112973	-0.146574	0.0499182	-0.109408	0.0806028	-0.695201	5.41244e-08		RBBP8
51247	PAIP2	poly(A) binding protein interacting protein 2	-0.500536	4.08925	-0.139262	0.0614394	-0.99354	0.0644487	-0.167809	0.0930482	-0.61972	2.03654e-08		PAIP2
1647	GADD45A	growth arrest and DNA damage inducible alpha	-0.218943	17.1116	-0.257464	0.0180699	-0.612174	4.77933e-32	-0.431105	0.0943481	-0.198622	0.0271664		GADD45A
1026	CDKN1A	cyclin dependent kinase inhibitor 1A	-0.00334078	49.2877	-0.561258	0.0180699	-0.185752	0.00640686	-0.154855	0.0823429	-0.260811	0.104268		CDKN1A
22955	SCMH1	Scm polycomb group protein homolog 1	-0.0924686	7.27681	-0.193854	0.0603272	-0.681522	0.0287125	-0.813931	0.00797374	-0.166502	1.59476e-07		SCMH1
4087	SMAD2	SMAD family member 2	-0.665144	5.81305	-0.145778	0.0601698	-0.586403	0.0156119	-0.129927	0.0843009	-0.959843	0.0170063		SMAD2
29063	ZCCHC4	zinc finger CCHC-type containing 4	-0.442772	7.14598	-0.525059	0.0108583	-0.0466963	0.0821484	-0.243551	0.0907661	-0.161533	0.106234		ZCCHC4
54206	ERRFI1	ERBB receptor feedback inhibitor 1	-0.00717521	5.48068	-0.156014	0.0175699	-0.483424	1.44178e-21	-0.108793	0.0892439	-1.61289	1.08297e-05		ERRFI1
79575	ABHD8	abhydrolase domain containing 8	-0.00357481	6.60164	-0.45837	0.0105778	-0.0569043	0.0199816	-0.165765	0.0943306	-0.14162	0.0242683		ABHD8
51390	AIG1	androgen induced 1	-0.105554	13.8638	-0.102773	0.0105282	-0.168675	0.000125031	-0.163937	0.080286	-4.00232	2.68122e-11		AIG1
3309	HSPA5	heat shock protein family A (Hsp70) member 5	-0.260141	5.24022	-0.418277	0.0104608	-0.509954	7.86131e-25	-0.175431	0.0926582	-0.0308876	0.00798478		HSPA5
7923	HSD17B8	hydroxysteroid 17-beta dehydrogenase 8	-0.603082	4.17279	-0.159639	0.0576331	-0.101368	0.015622	-0.506817	0.0889068	-0.00764974	0.0022515		HSD17B8
57088	PLSCR4	phospholipid scramblase 4	-0.00356372	29.4841	-0.00721368	0.0104288	-0.049264	0.0921363	-0.415344	0.0928986	-1.10848	0.000781166		PLSCR4
6560	SLC12A4	solute carrier family 12 member 4	-0.120641	11.9215	-0.0131921	0.0170009	-0.12242	6.787e-07	-0.288504	0.0912521	-0.640993	6.43795e-07		SLC12A4
170082	TCEANC	transcription elongation factor A N-terminal and central domain containing	-0.209494	4.05445	-0.454607	0.0103714	-0.00786463	0.0916108	-0.290214	0.087093	-2.22983	9.01624e-11		TCEANC
9068	ANGPTL1	angiopoietin like 1	-0.41489	39.2683	-0.216707	0.0571916	-0.00762938	0.000701026	-0.272979	0.0821747	-0.494047	0.104175		ANGPTL1
25914	RTTN	rotatin	-0.123983	9.74712	-0.819911	0.0102844	-0.102889	0.01297	-0.426789	0.0861244	-0.00756751	1.84128e-07		RTTN
1628	DBP	D-box binding PAR bZIP transcription factor	-0.00374679	6.63804	-0.250587	0.0566853	-0.271819	2.62635e-07	-0.212995	0.0984716	-2.58316	9.93297e-09		DBP
57552	NCEH1	neutral cholesterol ester hydrolase 1	-0.917668	5.19096	-0.109359	0.0166493	-0.198825	0.0149628	-0.168494	0.00797374	-0.888449	2.18854e-06		NCEH1
114789	SLC25A25	solute carrier family 25 member 25	-0.183608	7.55307	-0.484691	0.0452145	-0.503014	0.0132796	-0.124025	0.00797374	-0.805117	8.0822e-08		SLC25A25
6709	SPTAN1	spectrin alpha, non-erythrocytic 1	-0.433555	6.88666	-0.230546	0.0450802	-0.109853	0.0265133	-0.227776	0.0936613	-1.23557	6.99319e-12		SPTAN1
54472	TOLLIP	toll interacting protein	-0.122127	22.955	-0.19607	0.0450031	-0.625758	0.0142041	-0.663147	0.00797374	-0.223709	0.083447		TOLLIP
55246	CCDC25	coiled-coil domain containing 25	-0.107506	22.9726	-0.00337104	0.04399	-0.664875	0.00369542	-0.421938	0.0818266	-0.601049	2.58519e-06		CCDC25
2166	FAAH	fatty acid amide hydrolase	-0.144137	15.6743	-0.0177637	0.00767047	-0.106864	0.0294574	-0.21601	0.0870175	-0.507737	0.000233987		FAAH
150962	PUS10	pseudouridine synthase 10	-0.00317888	8.67661	-0.213189	0.0436788	-0.0284002	0.0862205	-0.149254	0.0942252	-0.577556	0.00349882		PUS10
54432	YIPF1	Yip1 domain family member 1	-0.00761482	19.4064	-0.281238	0.0435851	-0.153013	0.069801	-0.248912	0.0907661	-0.995406	9.64305e-11		YIPF1
4676	NAP1L4	nucleosome assembly protein 1 like 4	-0.230035	12.823	-0.475147	0.00749709	-0.0898422	0.0868993	-0.562643	0.00797374	-0.0144368	0.000133281		NAP1L4
23764	MAFF	MAF bZIP transcription factor F	-0.147941	3.97843	-0.123852	0.0423719	-0.813466	3.22773e-46	-0.153839	0.00797374	-1.10202	2.37149e-10		MAFF
128553	TSHZ2	teashirt zinc finger homeobox 2	-0.155691	13.2499	-0.12975	0.00737053	-0.189737	0.00760081	-0.194406	0.00797374	-0.14162	0.00791122		TSHZ2
401152	C4orf3	chromosome 4 open reading frame 3	-0.173959	24.6199	-0.84446	0.0411109	-0.164209	0.00885781	-0.219992	0.0906119	-0.226861	0.0553075		C4orf3
10116	FEM1B	fem-1 homolog B	-0.110381	9.16818	-0.00730736	0.0150433	-0.837935	0.00839051	-0.873816	0.00797374	-0.161375	0.00310419		FEM1B
2107	ETF1	eukaryotic translation termination factor 1	-0.0031126	9.54944	-0.0156309	0.04068	-0.277491	3.03489e-12	-0.558958	0.0847185	-1.3186	7.25904e-15		ETF1
80017	DGLUCY	D-glutamate cyclase	-0.208147	34.7366	-0.00325987	0.0402321	-0.0190879	0.00796572	-0.180842	0.0973995	-0.208172	0.0200068		DGLUCY
874	CBR3	carbonyl reductase 3	-0.0079337	18.4579	-0.100735	0.0797993	-0.45585	0.0158123	-0.110657	0.00797374	-1.97689	0.000373355		CBR3
10463	SLC30A9	solute carrier family 30 member 9	-0.0071103	6.74114	-0.279664	0.00395659	-0.146233	0.0693773	-0.841418	0.0971474	-0.0145233	0.00044817		SLC30A9
306	ANXA3	annexin A3	-0.404448	11.8403	-0.835049	0.0141254	-0.23055	0.00744121	-0.404775	0.0859654	-0.436395	0.0118461		ANXA3
123606	NIPA1	NIPA magnesium transporter 1	-0.147403	19.2098	-0.172662	0.0139743	-0.0324903	0.0609774	-0.658539	0.00797374	-0.0121298	0.100296		NIPA1
5887	RAD23B	RAD23 homolog B, nucleotide excision repair protein	-0.239736	10.0072	-0.884017	0.0134015	-0.00785006	0.0901322	-0.00799875	0.00797374	-0.169711	2.17118e-09		RAD23B
127544	RNF19B	ring finger protein 19B	-0.13667	21.8102	-0.236237	0.0132469	-0.138435	2.68758e-07	-0.137722	0.00797374	-1.48307	2.12145e-09		RNF19B
22824	HSPA4L	heat shock protein family A (Hsp70) member 4 like	-0.242779	18.7934	-0.193197	0.0131234	-0.0393153	0.0882298	-0.113995	0.0828357	-3.59495	3.49335e-11		HSPA4L
54948	MRPL16	mitochondrial ribosomal protein L16	-0.514487	4.48481	-0.872654	0.0130327	-0.841522	0.00876054	-0.588249	0.0976922	-0.61327	6.85994e-05		MRPL16
1346	COX7A1	cytochrome c oxidase subunit 7A1	-0.194869	20.0071	-0.0177663	0.0130043	-0.477415	0.0806968	-0.267159	0.0895149	-0.635817	0.00302685		COX7A1
84938	ATG4C	autophagy related 4C cysteine peptidase	-0.96085	7.13283	-0.130672	0.0126167	-0.152821	0.0156938	-0.219848	0.0927219	-0.247662	0.0149103		ATG4C
727936	GXYLT2	glucoside xylosyltransferase 2	-0.26576	9.68556	-0.172196	0.0125302	-0.112478	3.48316e-06	-0.46222	0.0994411	-0.0145233	0.00301529		GXYLT2
9124	PDLIM1	PDZ and LIM domain 1	-0.125381	18.601	-0.167395	0.0120294	-0.610822	0.0286219	-0.00722253	0.0846487	-2.85816	1.62839e-13		PDLIM1
4547	MTTP	microsomal triglyceride transfer protein	-0.531996	4.05326	-0.131656	0.0120065	-0.501704	0.0722663	-0.571678	0.0992199	-0.487885	0.0859092		MTTP
219402	MTIF3	mitochondrial translational initiation factor 3	-0.535716	10.2836	-0.882313	0.0120004	-0.0544211	0.0816923	-0.108268	0.00797374	-0.290518	1.80424e-08		MTIF3
266812	NAP1L5	nucleosome assembly protein 1 like 5	-0.251204	24.045	-0.95987	0.0112099	-0.0664192	0.0604821	-0.21634	0.0986275	-2.87241	8.70122e-14		NAP1L5
5937	RBMS1	RNA binding motif single stranded interacting protein 1	-0.00376408	7.93651	-0.214677	0.00392987	-0.271137	1.94057e-08	-0.123132	0.0989786	-0.170083	0.084101		RBMS1
4123	MAN2C1	mannosidase alpha class 2C member 1	-0.613455	11.1146	-0.00744072	0.0773914	-0.238782	0.0297666	-0.117485	0.00797374	-0.236561	0.105198		MAN2C1
7052	TGM2	transglutaminase 2	-0.151983	9.87099	-0.161824	0.0109861	-0.212841	0.060238	-0.130481	0.00797374	-3.70813	8.10625e-12		TGM2
57020	VPS35L	VPS35 endosomal protein sorting factor like	-0.892048	7.78313	-0.227078	0.00382963	-0.20881	0.0530323	-0.16519	0.0936271	-0.195918	0.0264851		VPS35L
5187	PER1	period circadian regulator 1	-0.123035	12.723	-0.11285	0.0760502	-0.196233	0.0626659	-0.00714387	0.0858341	-2.41873	7.86259e-14		PER1
10868	USP20	ubiquitin specific peptidase 20	-0.116991	14.2044	-0.125797	0.0106719	-0.180744	0.0124037	-0.476259	0.0835598	-1.11661	6.48558e-12		USP20
467	ATF3	activating transcription factor 3	-0.222638	4.46826	-0.257735	0.0634418	-0.240957	0.00053011	-0.171033	0.098897	-0.641096	5.58175e-06		ATF3
27245	AHDC1	AT-hook DNA binding motif containing 1	-0.277003	5.23821	-0.987206	0.0104182	-0.0378565	0.0903832	-0.107717	0.00797374	-0.913939	0.000437301		AHDC1
9701	PPP6R2	protein phosphatase 6 regulatory subunit 2	-0.593658	10.9412	-0.672113	0.0631215	-0.154554	0.0218195	-0.212348	0.0946231	-0.166081	0.00311434		PPP6R2
54681	P4HTM	prolyl 4-hydroxylase, transmembrane	-0.00781575	11.0003	-0.115422	0.0103746	-0.588142	0.01026	-0.164916	0.0943306	-1.31232	2.32275e-07		P4HTM
3295	HSD17B4	hydroxysteroid 17-beta dehydrogenase 4	-0.128626	25.6428	-0.84191	0.0102734	-0.191826	0.052177	-0.15981	0.0929659	-1.15285	1.87113e-10		HSD17B4
80021	TMEM62	transmembrane protein 62	-0.124271	20.2389	-0.800345	0.0620041	-0.0876371	0.0540773	-0.194223	0.0936082	-0.291016	0.0012293		TMEM62
4482	MSRA	methionine sulfoxide reductase A	-0.281086	49.6492	-0.127142	0.0101303	-0.543619	0.0339321	-0.123132	0.0998022	-0.539328	0.0761743		MSRA
1263	PLK3	polo like kinase 3	-0.191016	23.2903	-0.439463	0.0100992	-0.104155	0.0650931	-0.171496	0.00797374	-0.0076557	0.000190617		PLK3
2962	GTF2F1	general transcription factor IIF subunit 1	-0.0171496	7.21236	-0.57589	0.0612552	-0.260651	0.0474817	-0.202783	0.0923994	-0.292264	0.00705172		GTF2F1
1743	DLST	dihydrolipoamide S-succinyltransferase	-0.161019	6.12273	-0.527285	0.0611992	-0.633296	0.015805	-0.545291	0.0973378	-0.929181	1.69067e-11		DLST
10427	SEC24B	SEC24 homolog B, COPII coat complex component	-0.131853	15.4304	-0.0177931	0.0100358	-0.280908	0.0237086	-0.644733	0.00797374	-0.285965	0.000858706		SEC24B
5334	PLCL1	phospholipase C like 1 (inactive)	-0.410382	17.6541	-0.636651	0.0606431	-0.179228	0.0261106	-0.127275	0.00797374	-0.293099	0.0992048		PLCL1
5328	PLAU	plasminogen activator, urokinase	-0.147881	5.54228	-0.245615	0.0606431	-0.00904154	0.0938497	-0.82559	0.00797374	-0.481664	0.0182709		PLAU
201501	ZBTB7C	zinc finger and BTB domain containing 7C	-0.00375531	20.4276	-0.411077	0.00353131	-0.278549	0.088688	-0.499349	0.0939807	-6.01456	9.18966e-09		ZBTB7C
201799	TMEM154	transmembrane protein 154	-0.00348773	28.5596	-0.895613	0.0605077	-0.0399543	0.0812924	-0.668815	0.0885731	-0.800599	1.59438e-08		TMEM154
79142	PHF23	PHD finger protein 23	-0.185116	5.01518	-0.643952	0.0597882	-0.0308885	0.0937339	-0.130673	0.0841576	-0.00790624	3.26772e-07		PHF23
55466	DNAJA4	DnaJ heat shock protein family (Hsp40) member A4	-0.104535	5.81914	-0.612995	0.00347187	-0.0198825	0.00398546	-0.109352	0.00797374	-1.0815	0.0112541		DNAJA4
8493	PPM1D	protein phosphatase, Mg2+/Mn2+ dependent 1D	-0.163424	8.21769	-0.0142447	0.0034687	-0.158143	0.0591676	-0.531221	0.00797374	-1.61547	5.81354e-14		PPM1D
27235	COQ2	coenzyme Q2, polyprenyltransferase	-0.00386887	11.0792	-0.01403	0.00343731	-0.102274	0.00759764	-0.126182	0.0997468	-0.148972	0.0176228		COQ2
54843	SYTL2	synaptotagmin like 2	-0.171848	12.3129	-0.186613	0.00338399	-0.175152	0.00336941	-0.24388	0.0979201	-2.03199	9.22977e-06		SYTL2
132660	LIN54	lin-54 DREAM MuvB core complex component	-0.00744526	7.23545	-0.0156194	0.00334547	-0.0670295	0.00799473	-0.169406	0.0911772	-0.255553	0.0172421		LIN54
81556	INTS14	integrator complex subunit 14	-0.267302	4.69764	-0.286855	0.00329804	-0.174394	0.043678	-0.113995	0.0851113	-0.0144368	0.00118883		INTS14
83987	CCDC8	coiled-coil domain containing 8	-0.107093	16.4794	-0.271752	0.0927212	-0.0572476	0.0630255	-0.140729	0.0953158	-0.157308	0.0818665		CCDC8
56963	RGMA	repulsive guidance molecule BMP co-receptor a	-0.266556	9.98937	-0.469441	0.0032808	-0.508274	0.00697245	-0.109352	0.00797374	-3.25493	1.86734e-10		RGMA
1740	DLG2	discs large MAGUK scaffold protein 2	-0.00367329	22.5516	-0.105296	0.0913703	-0.2731	0.0240578	-0.00759174	0.0844108	-3.57017	7.19404e-14		DLG2
28966	SNX24	sorting nexin 24	-0.520215	8.80046	-0.115424	0.0900872	-0.0693749	0.00180541	-0.108754	0.00798049	-0.839249	0.0826115		SNX24
5567	PRKACB	protein kinase cAMP-activated catalytic subunit beta	-0.19443	11.2974	-0.567973	0.0546313	-0.00765208	0.0623559	-0.113122	0.0936944	-0.659233	0.0115766		PRKACB
7327	UBE2G2	ubiquitin conjugating enzyme E2 G2	-0.0568724	13.8974	-0.823836	0.0899857	-0.114352	0.00176925	-0.158028	0.0942494	-0.547275	2.25775e-07		UBE2G2
1915	EEF1A1	eukaryotic translation elongation factor 1 alpha 1	-0.00721806	23.443	-0.174648	0.00311678	-0.132996	6.26495e-27	-0.114531	0.0967801	-0.978104	2.2012e-07		EEF1A1
146330	FBXL16	F-box and leucine rich repeat protein 16	-0.157027	13.0477	-0.120419	0.0527366	-0.0314871	0.00708986	-0.124127	0.00797374	-1.68701	0.0372106		FBXL16
1465	CSRP1	cysteine and glycine rich protein 1	-0.202845	24.7629	-0.93969	0.0864847	-0.117003	0.0135531	-0.127275	0.0909763	-0.103329	0.00352933		CSRP1
57492	ARID1B	AT-rich interaction domain 1B	-0.151432	4.5127	-0.288958	0.00306278	-0.13636	0.0605287	-0.544321	0.0878661	-0.0078733	3.65109e-07		ARID1B
23508	TTC9	tetratricopeptide repeat domain 9	-0.426289	39.2784	-0.129664	0.0520778	-0.0766529	0.0565524	-0.674579	0.0859654	-3.93289	7.54931e-12		TTC9
10957	PNRC1	proline rich nuclear receptor coactivator 1	-0.148057	16.1046	-0.983156	0.0519134	-0.264333	1.71835e-07	-0.404117	0.0846487	-1.16721	2.53378e-09		PNRC1
54899	PXK	PX domain containing serine/threonine kinase like	-0.00724445	4.46291	-0.567761	0.0515319	-0.455594	0.0150418	-0.129634	0.00797374	-0.00739508	6.92669e-07		PXK
2060	EPS15	epidermal growth factor receptor pathway substrate 15	-0.113809	18.9215	-0.860543	0.0845787	-0.823578	0.0105648	-0.504919	0.0848003	-0.262586	0.00251589		EPS15
395	ARHGAP6	Rho GTPase activating protein 6	-0.105903	26.1436	-0.163679	0.0841011	-0.644748	0.00145406	-0.949527	0.0801701	-1.05448	0.00853019		ARHGAP6
256471	MFSD8	major facilitator superfamily domain containing 8	-0.863847	7.33254	-0.817212	0.0504988	-0.188649	0.0129999	-0.129634	0.0914669	-0.917683	0.0272324		MFSD8
51335	NGRN	neugrin, neurite outgrowth associated	-0.440249	4.05564	-0.409388	0.0294471	-0.09593	0.00731909	-0.661683	0.0802484	-0.169035	0.0132344		NGRN
399979	SNX19	sorting nexin 19	-0.12015	12.64	-0.638002	0.0399265	-0.150703	0.0221531	-0.278995	0.0901801	-0.293099	5.84497e-10		SNX19
6840	SVIL	supervillin	-0.147449	4.14242	-0.100862	0.0816571	-0.4575	0.0194211	-0.100624	0.0967225	-0.260493	0.00305145		SVIL
84954	MPND	MPN domain containing	-0.187034	4.64854	-0.588375	0.0388599	-0.556492	0.0686563	-0.685551	0.00797374	-0.536832	4.32242e-06		MPND
6932	TCF7	transcription factor 7	-0.129201	19.6979	-0.91424	0.0382014	-0.120998	0.0208153	-0.117922	0.00797374	-1.93766	0.000100174		TCF7
23327	NEDD4L	NEDD4 like E3 ubiquitin protein ligase	-0.00754087	5.71398	-0.014075	0.0283326	-0.164929	0.00347158	-0.124025	0.00797374	-2.24235	9.70037e-09		NEDD4L
3559	IL2RA	interleukin 2 receptor subunit alpha	-0.00356295	23.2368	-0.228169	0.0282015	-0.589076	0.00382611	-0.894561	0.0943196	-3.07616	0.000112645		IL2RA
1854	DUT	deoxyuridine triphosphatase	-0.210201	4.36132	-0.172519	0.0779453	-0.596824	0.0559168	-0.145148	0.00797374	-0.290518	0.100201		DUT
6046	BRD2	bromodomain containing 2	-0.246984	4.6039	-0.0142255	0.0278028	-0.232457	1.4964e-06	-0.230645	0.0862909	-0.00760852	8.33397e-08		BRD2
1355	COX15	cytochrome c oxidase assembly homolog COX15	-0.505262	10.0078	-0.63593	0.0370204	-0.0749358	0.00348289	-0.158471	0.0942252	-0.801967	2.20866e-08		COX15
10048	RANBP9	RAN binding protein 9	-0.255275	8.92472	-0.908134	0.0774203	-0.114458	5.81596e-07	-0.824069	0.0974547	-0.859113	5.89704e-11		RANBP9
70	PER2	BCL2 apoptosis regulator	-0.00330398	37.361	-0.142833	0.0764755	-0.287794	9.75299e-13	-0.633635	0.0942119	-3.90248	1.20921e-08		PER2
4126	MANBA	mannosidase beta	-0.118737	5.30885	-0.0130149	0.0359732	-0.138666	0.00310969	-0.276756	0.00797374	-1.9446	6.46479e-09		MANBA
114792	KLHL32	kelch like family member 32	-0.130653	8.38938	-0.485222	0.0270415	-0.0301537	0.0567448	-0.167787	0.0869932	-3.18871	6.85164e-07		KLHL32
301	ANXA1	annexin A1	-0.41716	36.3005	-0.0032708	0.0269776	-0.421933	4.17142e-15	-0.107755	0.00797374	-1.0528	2.81935e-10		ANXA1
5338	PLD2	phospholipase D2	-0.00380923	8.10654	-0.480283	0.0263258	-0.0925254	0.0616534	-0.242951	0.0889408	-0.0121501	0.000139921		PLD2
873	CBR1	carbonyl reductase 1	-0.904288	6.85279	-0.13889	0.0738202	-0.13101	0.00714447	-0.179907	0.00797374	-1.35954	0.0637059		CBR1
7566	ZNF18	zinc finger protein 18	-0.426317	4.47243	-0.104449	0.0442211	-0.164164	0.0223789	-0.232635	0.0911703	-0.191716	0.10206		ZNF18
23052	ENDOD1	endonuclease domain containing 1	-0.238863	23.5234	-0.242357	0.0733364	-0.145836	0.0037153	-0.15209	0.0960126	-0.234382	0.102212		ENDOD1
286319	TUSC1	tumor suppressor candidate 1	-0.614803	6.23889	-0.613461	0.0435225	-0.0279622	0.0851751	-0.00769507	0.0804796	-0.27606	0.09612		TUSC1
57447	NDRG2	NDRG family member 2	-0.00321255	25.0251	-0.185766	0.0721834	-0.204451	0.00733889	-0.132336	0.0895149	-2.19379	8.92901e-07		NDRG2
26035	GLCE	glucuronic acid epimerase	-0.578605	10.4108	-0.0132025	0.0433754	-0.257516	0.0188907	-0.411886	0.0938721	-1.64605	2.0211e-09		GLCE
5253	PHF2	PHD finger protein 2	-0.00717961	12.1107	-0.0155925	0.025242	-0.0604699	0.00360851	-0.124649	0.0874513	-0.52156	1.71445e-06		PHF2
23005	MAPKBP1	mitogen-activated protein kinase binding protein 1	-0.10313	17.7807	-0.437658	0.0251522	-0.180856	0.00704737	-0.00745296	0.00797374	-0.192579	0.0168968		MAPKBP1
79683	ZDHHC14	zinc finger DHHC-type palmitoyltransferase 14	-0.14301	15.9228	-0.523652	0.0249412	-0.115379	0.0259776	-0.545464	0.00797374	-2.84646	2.07497e-13		ZDHHC14
408	ARRB1	arrestin beta 1	-0.660766	19.2428	-0.601628	0.0418304	-0.121988	0.0511703	-0.632308	0.091775	-4.2501	5.04491e-13		ARRB1
594	BCKDHB	branched chain keto acid dehydrogenase E1 subunit beta	-0.881722	9.79638	-0.00331853	0.0248045	-0.0525568	0.00715815	-0.607572	0.0897192	-1.00551	5.07786e-09		BCKDHB
51138	COPS4	COP9 signalosome subunit 4	-0.85568	9.27463	-0.579161	0.0414517	-0.11278	0.0301494	-0.223796	0.0861266	-0.903825	0.0240553		COPS4
26751	SH3YL1	SH3 and SYLF domain containing 1	-0.00752034	12.6199	-0.969616	0.0242762	-0.00907081	0.0938507	-0.00370617	0.0849494	-0.951702	0.00407763		SH3YL1
79932	KIAA0319L	KIAA0319 like	-0.00393205	10.8066	-0.00345583	0.0242632	-0.153324	0.00382174	-0.145709	0.00797374	-0.278567	6.02763e-06		KIAA0319L
29760	BLNK	B cell linker	-0.457904	50.8488	-0.214757	0.0675652	-0.0669211	0.0113658	-0.26595	0.00797374	-0.292111	0.000675328		BLNK
627	BDNF	brain derived neurotrophic factor	-0.48853	7.69882	-0.147752	0.0669256	-0.123109	5.97413e-08	-0.862393	0.00797374	-0.194386	0.00724807		BDNF
27289	RND1	Rho family GTPase 1	-0.197482	10.0032	-0.179702	0.0238792	-0.0769447	0.0840306	-0.166379	0.00797374	-1.59343	0.000122865		RND1
25825	BACE2	beta-secretase 2	-0.171277	13.9139	-0.014208	0.0664037	-0.0316888	0.0032072	-0.209621	0.0909763	-0.660205	0.00671935		BACE2
1025	CDK9	cyclin dependent kinase 9	-0.474109	8.63697	-0.533989	0.00395506	-0.100025	0.0816688	-0.171051	0.0817466	-0.151667	0.00367395		CDK9
51776	MAP3K20	mitogen-activated protein kinase kinase kinase 20	-0.0077243	11.0071	-0.480671	0.0236337	-0.487519	0.0468589	-0.108754	0.0841752	-1.62375	1.21923e-11		MAP3K20
197131	UBR1	ubiquitin protein ligase E3 component n-recognin 1	-0.127503	14.1824	-0.00394476	0.0233921	-0.571317	0.00715817	-0.145103	0.0929659	-0.0123646	8.63817e-06		UBR1
5524	PTPA	protein phosphatase 2 phosphatase activator	-0.694858	11.3688	-0.619734	0.00390332	-0.162052	1.86047e-07	-0.686243	0.0980456	-0.0123648	0.00922768		PTPA
7158	TP53BP1	tumor protein p53 binding protein 1	-0.230856	3.86769	-0.802001	0.00388588	-0.0420639	0.0808654	-0.651272	0.00797374	-0.404611	0.106906		TP53BP1
25771	TBC1D22A	TBC1 domain family member 22A	-0.204401	14.7174	-0.897895	0.0642616	-0.0706749	0.0829388	-0.130607	0.0923571	-0.966979	0.0187043		TBC1D22A
7915	ALDH5A1	aldehyde dehydrogenase 5 family member A1	-0.157144	9.37976	-0.249689	0.0641684	-0.0524791	0.0623457	-0.165325	0.0951337	-1.17799	0.000192532		ALDH5A1
11346	SYNPO	synaptopodin	-0.224581	37.1377	-0.157113	0.00371103	-0.0254988	0.0416177	-0.295222	0.093183	-0.805019	0.013454		SYNPO
4920	ROR2	receptor tyrosine kinase like orphan receptor 2	-0.186621	11.8029	-0.599312	0.0221011	-0.288092	0.027448	-0.131215	0.0838572	-0.957482	0.00387172		ROR2
54893	MTMR10	myotubularin related protein 10	-0.196289	43.2825	-0.433114	0.0219345	-0.0460896	0.0868993	-0.109202	0.00797374	-2.44621	1.02197e-15		MTMR10
57458	TMCC3	transmembrane and coiled-coil domain family 3	-0.158952	21.0692	-0.0131294	0.0219341	-0.0654039	0.028884	-0.152379	0.00797374	-1.50796	6.30055e-11		TMCC3
27165	GLS2	glutaminase 2	-0.14647	7.15419	-0.914548	0.00361848	-0.0834837	0.0171736	-0.181059	0.0936611	-1.09293	0.105579		GLS2
25819	NOCT	nocturnin	-0.574908	11.5545	-0.152263	0.00359047	-0.561727	0.00783059	-0.119381	0.00797374	-0.27869	0.102709		NOCT
4088	SMAD3	SMAD family member 3	-0.463992	17.4184	-0.0130358	0.00354789	-0.0670295	8.27639e-06	-0.176	0.0880942	-3.22526	1.18685e-08		SMAD3
9836	LCMT2	leucine carboxyl methyltransferase 2	-0.907129	10.6756	-0.583361	0.0210771	-0.232622	0.0627177	-0.114531	0.00797374	-0.19691	0.0982384		LCMT2
23635	SSBP2	single stranded DNA binding protein 2	-0.198097	11.2327	-0.686258	0.00346923	-0.606575	0.00369585	-0.698718	0.0829379	-0.831878	0.000334261		SSBP2
55909	BIN3	bridging integrator 3	-0.487315	13.7863	-0.636651	0.0208747	-0.0533061	0.088284	-0.177966	0.0960798	-0.530487	0.000546843		BIN3
201973	PRIMPOL	primase and DNA directed polymerase	-0.108935	5.71793	-0.459409	0.0208747	-0.0258717	0.0856234	-0.237656	0.0908037	-0.465602	0.0129757		PRIMPOL
4779	NFE2L1	NFE2 like bZIP transcription factor 1	-0.00352606	4.014	-0.96919	0.0578329	-0.100828	0.0030082	-0.565061	0.0813732	-0.243733	0.0252283		NFE2L1
666	BOK	BCL2 family apoptosis regulator BOK	-0.201463	12.4656	-0.904846	0.00343976	-0.101761	0.00102681	-0.181059	0.0936082	-2.13288	8.13635e-08		BOK
3131	HLF	HLF transcription factor, PAR bZIP family member	-0.00397312	20.0032	-0.139473	0.00342971	-0.409052	0.0222312	-0.164131	0.00797374	-1.83491	0.000107786		HLF
91283	MSANTD3	Myb/SANT DNA binding domain containing 3	-0.003088	10.1753	-0.0137623	0.0204355	-0.0215471	0.0915497	-0.883453	0.00798049	-0.893486	2.03507e-08		MSANTD3
116151	FAM210B	family with sequence similarity 210 member B	-0.219799	17.6883	-0.131328	0.0516169	-0.263538	0.0137832	-0.15049	0.00797374	-2.35663	1.36121e-12		FAM210B
1847	DUSP5	dual specificity phosphatase 5	-0.216552	8.70415	-0.238582	0.050751	-0.241625	0.0514693	-0.491776	0.0931066	-2.4793	5.09491e-12		DUSP5
10672	GNA13	G protein subunit alpha 13	-0.153962	5.84939	-0.982737	0.0505752	-0.00360198	2.08814e-16	-0.286267	0.0820139	-0.112422	0.0280662		GNA13
10314	LANCL1	LanC like glutathione S-transferase 1	-0.00767458	6.39396	-0.148558	0.0505636	-0.17961	0.047112	-0.101244	0.0949365	-1.00265	2.8395e-09		LANCL1
406	ARTNL	basic helix-loop-helix ARNT like 1	-0.257345	11.8885	-1.10769	0.0493295	-0.150856	0.0210328	-0.171033	0.0903409	-2.98097	1.06499e-11		ARTNL
55650	PIGV	phosphatidylinositol glycan anchor biosynthesis class V	-0.922369	14.9993	-0.0665698	0.0872439	-0.104907	0.0401795	-0.00370784	0.086316	-0.638294	0.000858706		PIGV
8861	LDB1	LIM domain binding 1	-0.0160777	4.78861	-0.0491098	0.0866615	-0.501477	0.0852754	-0.266895	0.0875424	-0.0144509	0.00262826		LDB1
30061	SLC40A1	solute carrier family 40 member 1	-0.451993	34.7153	-0.14753	0.016943	-0.124375	0.0124928	-0.115643	0.00797374	-5.20775	1.71336e-10		SLC40A1
4296	MAP3K11	mitogen-activated protein kinase kinase kinase 11	-0.540003	11.3952	-0.127362	0.0475264	-0.252399	0.0405344	-0.133555	0.00797374	-0.48605	3.54579e-07		MAP3K11
2395	FXN	frataxin	-0.142782	9.79952	-0.093855	0.0861244	-0.0697044	0.0828876	-0.140442	0.0957606	-1.43514	3.3079e-08		FXN
55748	CNDP2	carnosine dipeptidase 2	-0.213852	40.1281	-0.448281	0.0167184	-0.568722	0.0436955	-0.126041	0.00797374	-0.103329	0.0375241		CNDP2
55696	RBM22	RNA binding motif protein 22	-0.0251935	5.96996	-0.0156073	0.0167044	-0.682739	0.0121133	-0.104367	0.00797374	-0.0123648	0.00056506		RBM22
6484	ST3GAL4	ST3 beta-galactoside alpha-2,3-sialyltransferase 4	-0.627959	9.02991	-0.452464	0.0166578	-0.27893	0.0532219	-0.00728426	0.0962064	-1.28856	3.05731e-11		ST3GAL4
84134	TOMM40L	translocase of outer mitochondrial membrane 40 like	-0.138543	10.6379	-0.0594852	0.0851191	-0.556524	0.0272515	-0.121246	0.0853203	-0.268505	0.10027		TOMM40L
80271	ITPKC	inositol-trisphosphate 3-kinase C	-0.151892	4.73336	-0.129087	0.0850311	-0.956236	5.93228e-06	-0.141334	0.00797374	-1.09724	1.80457e-09		ITPKC
25945	NECTIN3	nectin cell adhesion molecule 3	-0.153182	5.42731	-0.154298	0.0466255	-0.864378	1.24793e-06	-0.534797	0.085264	-0.00767532	0.0746987		NECTIN3
6468	FBXW4	F-box and WD repeat domain containing 4	-0.645928	13.2134	-0.0834554	0.0842277	-0.112247	0.0554014	-0.533357	0.0982739	-0.0121712	0.00982865		FBXW4
283726	SAXO2	stabilizer of axonemal microtubules 2	-0.172994	13.7944	-0.0717155	0.084109	-0.0525568	0.0435911	-0.920881	0.0959034	-0.0121712	0.105068		SAXO2
4711	NDUFB5	NADH:ubiquinone oxidoreductase subunit B5	-0.0035758	7.62828	-0.916116	0.0459307	-0.152813	0.0275902	-0.250223	0.0812509	-0.581422	1.92226e-06		NDUFB5
3338	DNAJC4	DnaJ heat shock protein family (Hsp40) member C4	-0.655921	12.235	-0.529621	0.0161649	-0.142338	9.08634e-09	-0.579035	0.0979779	-0.263354	0.0471623		DNAJC4
340719	NANOS1	nanos C2HC-type zinc finger 1	-0.00312444	9.48159	-0.476683	0.0160499	-0.430894	0.0253978	-0.00736313	0.00797374	-5.20007	1.12921e-11		NANOS1
26524	LATS2	large tumor suppressor kinase 2	-0.147796	7.45751	-0.0035843	0.0156892	-0.0198825	0.0964298	-0.243502	0.0888382	-1.3977	5.14717e-11		LATS2
22980	TCF25	transcription factor 25	-0.442032	14.8069	-0.0601131	0.081303	-0.151429	0.0210899	-0.811404	0.0961023	-0.0121815	5.78518e-06		TCF25
23647	ARFIP2	ADP ribosylation factor interacting protein 2	-0.176811	13.7881	-0.131163	0.0436237	-0.0572476	0.0195424	-0.172431	0.0914509	-0.292111	0.00420385		ARFIP2
2235	FECH	ferrochelatase	-0.150763	20.4385	-0.112896	0.0429449	-0.98277	0.00232737	-0.222228	0.0910695	-1.13269	5.66901e-13		FECH
6575	SLC20A2	solute carrier family 20 member 2	-0.811163	8.31772	-0.985348	0.0412459	-0.181041	0.0112912	-0.171184	0.085545	-0.00784078	4.84792e-05		SLC20A2
84056	KATNAL1	katanin catalytic subunit A1 like 1	-0.102678	4.96896	-0.254809	0.0407967	-0.103555	0.052711	-0.420657	0.085039	-0.166081	0.0815662		KATNAL1
8604	SLC25A12	solute carrier family 25 member 12	-0.897594	24.4705	-0.100554	0.0402657	-0.445656	0.047977	-0.117122	0.0972933	-1.98071	2.93779e-10		SLC25A12
4854	NOTCH3	notch receptor 3	-0.423158	4.79886	-0.17927	0.040252	-0.0544211	0.0233953	-0.129927	0.0828357	-2.82497	4.2672e-11		NOTCH3
6764	DENND2B	DENN domain containing 2B	-0.154764	23.2842	-0.10467	0.0384479	-0.269693	0.00312861	-0.541076	0.00797374	-0.0120448	0.0210788		DENND2B
51313	GASK1B	golgi associated kinase 1B	-0.235684	22.3522	-0.271502	0.0373356	-0.156308	0.000340139	-0.232128	0.00797374	-1.103	0.00589141		GASK1B
3566	IL4R	interleukin 4 receptor	-0.127467	23.9084	-0.114792	0.0366042	-0.00795103	0.0905591	-0.102639	0.00797374	-1.1727	2.5932e-06		IL4R
8013	NR4A3	nuclear receptor subfamily 4 group A member 3	-0.00342657	7.55136	-0.0034958	0.0363089	-0.206416	0.000149424	-0.905201	0.088808	-2.35654	2.19092e-10		NR4A3
9377	COX5A	cytochrome c oxidase subunit 5A	-0.0861181	4.52248	-0.126385	0.0360702	-0.439769	0.0483262	-0.58231	0.00797374	-0.295066	0.0705339		COX5A
26118	WSB1	WD repeat and SOCS box containing 1	-0.0800097	4.05038	-0.105919	0.0354636	-0.283741	1.4344e-10	-0.29862	0.0857525	-0.967219	7.41329e-08		WSB1
3398	ID2	inhibitor of DNA binding 2	-0.198926	9.65217	-0.202007	0.0354636	-0.250398	0.000259558	-0.101078	0.0919351	-2.10459	3.7198e-08		ID2
133022	TRAM1L1	translocation associated membrane protein 1 like 1	-0.491735	9.64263	-0.167304	0.0353503	-0.0304853	0.060121	-0.187878	0.0964229	-2.90897	2.66882e-08		TRAM1L1
79877	DCAKD	dephospho-CoA kinase domain containing	-0.231665	11.778	-0.132933	0.0349539	-0.494033	0.0196436	-0.161806	0.00797374	-0.68928	4.15667e-07		DCAKD
6352	CCL5	C-C motif chemokine ligand 5	-0.427664	40.5859	-0.4891	0.0334027	-0.5378	0.00785091	-0.950408	0.0881794	-1.12981	0.0582032		CCL5
25999	CLIP3	CAP-Gly domain containing linker protein 3	-0.20999	9.53274	-0.142964	0.0314933	-0.106718	8.95615e-06	-0.199195	0.00797374	-0.499412	0.00398869		CLIP3
10252	SPRY1	sprouty RTK signaling antagonist 1	-0.221112	19.6807	-0.174737	0.0313605	-0.232794	1.65197e-08	-0.184138	0.00797374	-3.03705	8.71466e-11		SPRY1
2771	GNAI2	G protein subunit alpha i2	-0.122282	30.5196	-0.107432	0.0311252	-0.0258717	3.27995e-12	-0.207675	0.0873468	-0.576875	0.0407658		GNAI2
7188	TRAF5	TNF receptor associated factor 5	-0.135764	12.3184	-0.261018	0.0307383	-0.0652647	0.00739973	-0.479797	0.0917041	-2.5575	1.20863e-12		TRAF5
11031	RAB31	RAB31, member RAS oncogene family	-0.173327	13.4602	-0.209571	0.0305275	-0.239863	0.00314906	-0.29359	0.0879521	-2.76044	2.92014e-14		RAB31
6304	SATB1	SATB homeobox 1	-0.261679	16.3731	-0.203789	0.0298098	-0.0763256	0.00723256	-0.48768	0.0960581	-1.5901	0.0121932		SATB1
376940	ZC3H6	zinc finger CCCH-type containing 6	-0.948942	10.8696	-0.00343181	0.0549451	-0.165334	0.0457147	-0.284464	0.0906119	-0.29507	0.000828958		ZC3H6
5520	PPP2R2A	protein phosphatase 2 regulatory subunit Balpha	-0.949714	10.1245	-0.455146	0.0982725	-0.575112	0.0201992	-0.109202	0.0997926	-0.0308876	0.0741342		PPP2R2A
567	B2M	beta-2-microglobulin	-0.00359767	49.6965	-0.231052	0.0292459	-0.101754	2.00009e-06	-0.517244	0.00797374	-1.73207	4.64597e-13		B2M
55259	DNAI7	dynein axonemal intermediate chain 7	-0.124222	12.8744	-0.571801	0.0978973	-0.0699341	0.0530323	-0.486689	0.00797374	-0.46961	0.0279285		DNAI7
8553	BHLHE40	basic helix-loop-helix family member e40	-0.234936	25.4438	-0.132399	0.0975943	-0.610673	8.32615e-32	-0.104304	0.00797374	-1.051	6.9308e-06		BHLHE40
84333	PCGF5	polycomb group ring finger 5	-0.179094	22.7101	-0.244355	0.0290981	-0.295368	0.0239359	-0.696819	0.0821167	-2.19016	1.47631e-10		PCGF5
51322	WAC	WW domain containing adaptor with coiled-coil	-0.150152	7.47664	-0.160604	0.0540984	-0.0338064	3.85368e-17	-0.461003	0.0813732	-0.640566	0.00307343		WAC
119587	CPXM2	carboxypeptidase X, M14 family member 2	-0.00339092	27.8393	-0.631559	0.0964903	-0.132931	0.0147419	-0.182466	0.0939571	-1.35905	0.0374859		CPXM2
23237	ARC	activity regulated cytoskeleton associated protein	-0.123677	7.47879	-0.555443	0.053716	-0.240493	0.019731	-0.125911	0.0802484	-0.573718	0.0960976		ARC
23270	TSPYL4	TSPY like 4	-0.14639	9.86378	-0.00342982	0.0536821	-0.275535	0.038141	-0.21129	0.0929659	-0.0478878	0.102709		TSPYL4
27068	PPA2	inorganic pyrophosphatase 2	-0.112282	11.7882	-0.171746	0.0288433	-0.528968	0.00353855	-0.00741965	0.00797374	-0.29507	0.0446776		PPA2
55140	ELP3	elongator acetyltransferase complex subunit 3	-0.87853	16.4173	-0.107263	0.0288433	-0.0324903	0.091141	-0.231242	0.0891401	-0.227566	0.0307369		ELP3
9531	BAG3	BAG cochaperone 3	-0.101748	14.8636	-0.12184	0.0959066	-0.287211	2.33943e-09	-0.477801	0.0891652	-0.165128	0.00794916		BAG3
57017	COQ9	coenzyme Q9	-0.245662	12.6057	-0.119978	0.0287811	-0.0402102	0.0880858	-0.156327	0.0924373	-1.65476	1.14562e-13		COQ9
80303	EFHD1	EF-hand domain family member D1	-0.146844	5.14804	-0.135097	0.094901	-0.268811	0.00709736	-0.171548	0.0804529	-0.161533	0.0032344		EFHD1
113612	CYP2U1	cytochrome P450 family 2 subfamily U member 1	-0.27947	15.407	-0.229322	0.0518692	-0.0654039	0.0517567	-0.49266	0.0816371	-0.205909	0.106703		CYP2U1
23474	ETHE1	ETHE1 persulfide dioxygenase	-0.107534	9.57772	-0.0176121	0.0920826	-0.0858885	0.080516	-0.903016	0.00797374	-0.113171	0.102288		ETHE1
9289	ADGRG1	adhesion G protein-coupled receptor G1	-0.921861	14.2935	-0.256875	0.0276964	-0.541685	0.0143969	-0.280167	0.0824013	-5.17758	2.04572e-11		ADGRG1
8878	SQSTM1	sequestosome 1	-0.551678	5.6614	-0.251233	0.0512849	-0.0225836	5.01151e-11	-0.119592	0.080387	-1.88914	4.44018e-10		SQSTM1
55192	DNAJC17	DnaJ heat shock protein family (Hsp40) member C17	-0.520893	6.4743	-0.808399	0.0903829	-0.202774	0.0221502	-0.00746999	0.00797374	-0.61168	1.18857e-06		DNAJC17
9306	SOCS6	suppressor of cytokine signaling 6	-0.976527	18.0186	-0.588866	0.0894183	-0.56682	0.0123872	-0.59029	0.00797374	-0.012035	0.020977		SOCS6
199223	TTC21A	tetratricopeptide repeat domain 21A	-0.00377122	9.94401	-0.0140678	0.0398465	-0.178994	0.00305953	-0.126182	0.0813576	-0.268381	0.100297		TTC21A
85449	KIAA1755	KIAA1755	-0.143638	14.5316	-0.279615	0.0394173	-0.450719	0.0490446	-0.291981	0.00797374	-0.24402	0.00713158		KIAA1755
56904	SH3GLB2	SH3 domain containing GRB2 like, endophilin B2	-0.126115	4.62658	-0.188869	0.038947	-0.0316888	0.093944	-0.124127	0.0988293	-2.36749	4.43198e-12		SH3GLB2
124152	IQCK	IQ motif containing K	-0.214596	7.34135	-0.0141543	0.038947	-0.0285859	0.0676618	-0.260905	0.0901132	-0.622345	0.0267306		IQCK
57648	KIAA1522	KIAA1522	-0.459793	10.6129	-0.296361	0.0389284	-0.132102	0.0261733	-0.133908	0.00797374	-1.94242	2.70259e-12		KIAA1522
5918	RARRES1	retinoic acid receptor responder 1	-0.187935	17.216	-0.0156385	0.0383255	-0.0569043	0.0438241	-0.403726	0.00797374	-0.132382	0.00377751		RARRES1
80760	ITIH5	inter-alpha-trypsin inhibitor heavy chain 5	-0.455351	36.6956	-0.938731	0.0382188	-0.208312	3.86481e-09	-0.10319	0.00797374	-1.44757	3.29097e-08		ITIH5
124359	CDYL2	chromodomain Y like 2	-0.107898	5.10445	-0.14062	0.0260313	-0.106753	0.049625	-0.186808	0.00797374	-0.881508	0.00386456		CDYL2
4041	LRP5	LDL receptor related protein 5	-0.213401	18.3845	-0.135012	0.0259912	-0.0133222	0.0973333	-0.561642	0.00899854	-4.87775	1.46462e-10		LRP5
81704	DOCK8	dedicator of cytokinesis 8	-0.400303	59.947	-0.417534	0.0259597	-0.144117	0.0124022	-0.10351	0.00797374	-3.69085	2.83177e-15		DOCK8
1408	CRY2	cryptochrome circadian regulator 2	-0.148118	31.6808	-0.133328	0.025717	-0.848596	0.0883327	-0.60814	0.0873124	-0.0144509	0.0199024		CRY2
5467	PPARD	peroxisome proliferator activated receptor delta	-0.516011	4.04035	-0.275618	0.0373805	-0.0664192	0.0238186	-0.503001	0.0804663	-0.50497	0.00304456		PPARD
488	ATP2A2	ATPase sarcoplasmic/endoplasmic reticulum Ca2+ transporting 2	-0.109398	4.5403	-0.109074	0.0255491	-0.152462	0.000335716	-0.271376	0.0871164	-0.173355	0.10683		ATP2A2
79365	BHLHE41	basic helix-loop-helix family member e41	-0.155481	11.3421	-0.647455	0.0365603	-0.10908	1.54929e-06	-0.42498	0.0959852	-2.7447	1.76647e-12		BHLHE41
80854	SETD7	SET domain containing 7, histone lysine methyltransferase	-0.206345	23.2081	-0.505251	0.0819469	-0.555195	0.027259	-0.278454	0.0920415	-0.291016	2.09787e-09		SETD7
51117	COQ4	coenzyme Q4	-0.00708281	9.96282	-0.670347	0.0816123	-0.0400679	0.0876845	-0.611534	0.08242	-0.918875	6.52069e-11		COQ4
78987	CRELD1	cysteine rich with EGF like domains 1	-0.00789941	6.58631	-0.235297	0.0360762	-0.517395	0.0623192	-0.24675	0.00797374	-0.887036	0.00714486		CRELD1
25861	WHRN	whirlin	-0.940059	8.7803	-0.232101	0.0456784	-0.224484	0.0826062	-0.122208	0.0943987	-1.26617	3.88359e-06		WHRN
26030	PLEKHG3	pleckstrin homology and RhoGEF domain containing G3	-0.868632	5.88847	-0.127599	0.0244198	-0.106421	0.0597477	-0.954021	0.0802484	-0.103144	0.081176		PLEKHG3
3799	KIF5B	kinesin family member 5B	-0.0110759	9.00292	-0.29	0.0104275	-0.571317	0.0124037	-0.476259	0.00797374	-2.20495	9.1999e-15		KIF5B
10451	VAV3	vav guanine nucleotide exchange factor 3	-0.993362	12.8596	-0.00324493	0.0232031	-0.844005	0.0387445	-0.130673	0.00797374	-1.69191	1.34007e-11		VAV3
10844	TUBGCP2	tubulin gamma complex associated protein 2	-0.229303	6.28685	-0.126178	0.0231438	-0.198883	0.00314648	-0.980009	0.00797374	-0.251989	0.040428		TUBGCP2
3553	IL1B	interleukin 1 beta	-0.404249	9.8314	-0.676512	0.0230868	-0.175152	9.08634e-09	-0.660988	0.0996891	-2.5536	8.37979e-06		IL1B
64400	AKTIP	AKT interacting protein	-0.117652	9.53271	-0.533989	0.0230868	-0.1012	0.00786451	-0.146898	0.0928236	-0.627783	1.97608e-06		AKTIP
2131	EXT1	exostosin glycosyltransferase 1	-0.0557168	11.7402	-0.123757	0.0223257	-0.0692497	0.0134785	-0.113432	0.0894451	-0.639704	0.000663792		EXT1
6786	STIM1	stromal interaction molecule 1	-0.11271	12.9152	-0.15501	0.0221078	-0.137949	0.0538265	-0.12946	0.0885613	-0.997182	2.09216e-13		STIM1
1435	CSF1	colony stimulating factor 1	-0.00316808	25.9257	-0.267884	0.0218232	-0.134626	1.34763e-07	-0.523533	0.00797374	-0.610923	0.0855707		CSF1
840	CASP7	caspase 7	-0.160347	24.0498	-0.178159	0.0211249	-0.59288	0.0760662	-0.12946	0.0805667	-1.27461	4.83633e-12		CASP7
4054	LTBP3	latent transforming growth factor beta binding protein 3	-0.648594	22.9907	-0.192505	0.0196245	-0.149024	1.3301e-10	-0.493528	0.0846441	-0.959499	0.00438211		LTBP3
80148	SLC66A2	solute carrier family 66 member 2	-0.60018	10.4767	-0.186173	0.0195688	-0.0643263	0.0891731	-0.455813	0.0828652	-0.214165	0.0200877		SLC66A2
4781	NFIB	nuclear factor I B	-0.222626	6.98781	-0.423603	0.0190975	-0.139802	0.0855718	-0.122208	0.00797374	-3.47352	1.47555e-08		NFIB
51103	NDUFAF1	NADH:ubiquinone oxidoreductase complex assembly factor 1	-0.153481	33.9423	-0.140643	0.0188877	-0.0139998	0.0951309	-0.515108	0.0992199	-0.690382	0.10462		NDUFAF1
91010	FMNL3	formin like 3	-0.677723	24.2682	-0.260334	0.0181822	-0.204572	0.0486376	-0.145203	0.0980661	-0.292264	0.000675294		FMNL3
56181	MTFR1L	mitochondrial fission regulator 1 like	-0.414778	9.57148	-0.132027	0.018178	-0.101238	0.0460099	-0.437657	0.0820139	-0.466091	1.25282e-05		MTFR1L
2247	CRY1	fibroblast growth factor 2	-0.00326634	18.6218	-0.183247	0.0178227	-0.447443	0.0462848	-0.265425	0.00797374	-4.21647	1.67112e-07		CRY1
123355	LRRC28	leucine rich repeat containing 28	-0.658293	7.7358	-0.286434	0.0164455	-0.596172	0.0148763	-0.649383	0.0846943	-0.148191	0.0127426		LRRC28
2028	ENPEP	glutamyl aminopeptidase	-0.163036	6.90138	-0.0142007	0.0164455	-0.248895	0.00319045	-0.00712222	0.0997005	-3.94465	7.35541e-12		ENPEP
80149	ZC3H12A	zinc finger CCCH-type containing 12A	-0.216659	12.2746	-0.0035258	0.0163806	-0.510874	0.0129981	-0.924808	0.0806169	-0.618857	9.9671e-07		ZC3H12A
23135	KDM6B	lysine demethylase 6B	-0.00353545	7.49169	-0.23203	0.0156304	-0.0314871	1.26124e-09	-0.490713	0.0851113	-0.23774	0.0241442		KDM6B
114879	OSBPL5	oxysterol binding protein like 5	-0.181353	14.6545	-0.152878	0.0153493	-0.195162	0.0033841	-0.159292	0.0960137	-0.18425	0.105617		OSBPL5
133522	PPARGC1B	PPARG coactivator 1 beta	-0.135185	4.87693	-0.246684	0.0148124	-0.066893	0.0164137	-0.494929	0.0877193	-0.599719	0.0238581		PPARGC1B
23588	KLHDC2	kelch domain containing 2	-0.161177	4.56975	-0.14844	0.0140595	-0.22694	6.49042e-09	-0.206388	0.0857338	-0.0145253	0.000358527		KLHDC2
79960	JADE1	jade family PHD finger 1	-0.00755994	17.9639	-0.175245	0.0127082	-0.628895	0.0289928	-0.29818	0.0919939	-1.09825	0.00020164		JADE1
4717	NDUFC1	NADH:ubiquinone oxidoreductase subunit C1	-0.906499	5.0894	-0.162677	0.0125441	-0.132235	0.0797661	-0.175431	0.0882694	-0.679873	4.48408e-07		NDUFC1
90293	KLHL13	kelch like family member 13	-0.234206	5.57836	-0.256598	0.0121188	-0.0284002	0.0513564	-0.190335	0.00797374	-3.69814	2.47414e-06		KLHL13
26353	HSPB8	heat shock protein family B (small) member 8	-0.00371267	16.6986	-0.00330816	0.0119294	-0.4544	0.0272012	-0.564345	0.0920396	-3.38635	3.13989e-10		HSPB8
57561	ARRDC3	arrestin domain containing 3	-0.149157	12.7793	-0.0141286	0.0119294	-0.210432	0.0605307	-0.10614	0.00797374	-0.427736	0.00313398		ARRDC3
8722	CTSF	cathepsin F	-0.158774	13.468	-0.193333	0.0114213	-0.0493789	0.0863945	-0.838767	0.093254	-1.21557	0.000270235		CTSF
940	CD28	CD28 molecule	-0.433827	35.6138	-0.213877	0.0107083	-0.156947	0.05133	-0.117485	0.0908049	-3.77301	4.32849e-07		CD28
6284	S100A13	S100 calcium binding protein A13	-0.0036528	9.75093	-0.164223	0.0105914	-0.408975	0.053298	-0.228004	0.0996851	-0.120513	0.0982903		S100A13
7005	TEAD3	TEA domain transcription factor 3	-0.0952241	6.02907	-0.205422	0.0105767	-0.253209	0.0189251	-0.115198	0.086988	-0.142866	0.0835518		TEAD3
10422	UBAC1	UBA domain containing 1	-0.204405	5.10678	-0.169488	0.0104275	-0.204143	0.0449606	-0.608367	0.00797374	-2.20495	9.1999e-15		UBAC1
51015	ISOC1	isochorismatase domain containing 1	-0.141828	11.2259	-0.179143	0.0101961	-0.00797061	0.0167841	-0.126107	0.082077	-0.989739	0.0262969		ISOC1
94081	SFXN1	sideroflexin 1	-0.079665	10.9707	-0.191352	0.0094852	-0.120998	0.00166223	-0.812635	0.00797374	-0.146182	0.104927		SFXN1
6091	ROBO1	roundabout guidance receptor 1	-0.208344	7.95372	-0.206483	0.00920889	-0.217696	0.0899338	-0.631956	0.0911703	-0.403002	0.00374308		ROBO1
9766	SUSD6	sushi domain containing 6	-0.236642	40.1533	-0.202021	0.00863928	-0.414543	0.00363288	-0.115643	0.0992795	-0.230021	0.084894		SUSD6
7205	TRIP6	thyroid hormone receptor interactor 6	-0.00336788	10.6511	-0.201636	0.00855491	-0.507739	0.0103182	-0.108578	0.00797374	-0.981991	4.43612e-09		TRIP6
91653	BOC	BOC cell adhesion associated, oncogene regulated	-0.174605	24.0482	-0.261531	0.00854715	-0.171651	0.00321587	-0.117922	0.0928054	-0.201573	0.00377475		BOC
9261	MAPKAPK2	MAPK activated protein kinase 2	-0.460925	6.85838	-0.194022	0.008546	-0.111237	0.00346678	-0.875095	0.00797374	-0.27869	0.0505455		MAPKAPK2
498	ATP5F1A	ATP synthase F1 subunit alpha	-0.114989	16.3314	-0.120982	0.00853616	-0.198456	0.000351504	-0.271953	0.0815166	-1.11631	6.92032e-11		ATP5F1A
132720	FAM241A	family with sequence similarity 241 member A	-0.2543	30.1376	-0.190404	0.00825899	-0.0669211	0.00717163	-0.269177	0.0895149	-1.65706	0.000975455		FAM241A
5142	PDE4B	phosphodiesterase 4B	-0.246769	24.8102	-0.427949	0.00813341	-0.428795	4.15035e-17	-0.144686	0.0802484	-1.76542	7.91771e-08		PDE4B
7098	TLR3	toll like receptor 3	-0.499519	66.6674	-0.233147	0.00782943	-0.2308	0.00386996	-0.198384	0.00797374	-2.08504	8.60291e-08		TLR3
1376	CPT2	carnitine palmitoyltransferase 2	-0.128663	13.6906	-0.221879	0.00757825	-0.128567	0.0269268	-0.171496	0.0925884	-2.03216	6.03828e-16		CPT2
23362	PSD3	pleckstrin and Sec7 domain containing 3	-0.936352	4.79783	-0.0156317	0.00711248	-0.0554644	0.0675361	-0.221935	0.097967	-2.76876	1.08172e-13		PSD3
501	ALDH7A1	aldehyde dehydrogenase 7 family member A1	-0.486466	4.47466	-0.0140375	0.00701939	-0.113291	0.00712136	-0.555984	0.0847403	-2.48315	1.80198e-14		ALDH7A1
695	BTK	Bruton tyrosine kinase	-0.00384282	49.0282	-0.586151	0.00688891	-0.162052	1.86047e-07	-0.650574	0.0926456	-0.513766	0.0942106		BTK
695	RORA	Bruton tyrosine kinase	-0.00384282	49.0282	-0.586151	0.00688891	-0.264333	1.71835e-07	-0.650574	0.0926456	-0.513766	0.0942106		RORA
4780	NFE2L2	NFE2 like bZIP transcription factor 2	-0.119912	10.6379	-0.177273	0.00688891	-0.157481	0.012232	-0.130607	0.00797374	-1.54083	2.8305e-12		NFE2L2
85439	STON2	stonin 2	-0.267624	9.75765	-0.205958	0.00677339	-0.130678	0.0111228	-0.408283	0.0928236	-3.98287	2.23178e-10		STON2
7096	TLR1	toll like receptor 1	-0.433935	31.6347	-0.662525	0.00668698	-0.182	1.63096e-07	-0.113432	0.0877016	-2.98858	7.32453e-08		TLR1
64838	FNDC4	fibronectin type III domain containing 4	-0.165502	13.6397	-0.215326	0.00657461	-0.50885	0.0156981	-0.116996	0.00797374	-0.0123283	0.106715		FNDC4
4135	MAP6	microtubule associated protein 6	-0.164222	11.2546	-0.21115	0.00640379	-0.28087	0.0798288	-0.494331	0.0848302	-3.91052	4.98198e-07		MAP6
7026	NR2F2	nuclear receptor subfamily 2 group F member 2	-0.160945	13.7871	-0.219871	0.0063086	-0.248288	0.00379233	-0.280739	0.0873468	-1.16579	2.90501e-08		NR2F2
29126	CD274	CD274 molecule	-0.402407	18.0826	-0.548103	0.00575543	-0.487311	0.0204122	-0.824531	0.0805354	-1.89629	9.33203e-11		CD274
84935	MEDAG	mesenteric estrogen dependent adipogenesis	-0.134037	9.9118	-0.586203	0.00551132	-0.468328	2.56622e-30	-0.432221	0.0870145	-1.26864	0.0252882		MEDAG
596	BCL2	BCL2 apoptosis regulator	-0.0419192	6.76365	-0.456356	0.00548674	-0.249408	0.00375044	-0.178657	0.00797374	-0.247982	0.0160729		BCL2
10018	BCL2L11	BCL2 like 11	-0.0419192	6.76365	-0.456356	0.00548674	-0.249408	0.00375044	-0.178657	0.00797374	-0.247982	0.0160729		BCL2L11
80709	AKNA	AT-hook transcription factor	-0.00311486	62.2081	-0.0137091	0.00548674	-0.0219449	0.0907268	-0.583134	0.0842652	-0.0120636	0.090501		AKNA
64762	GAREM1	GRB2 associated regulator of MAPK1 subtype 1	-0.550639	11.2484	-0.250547	0.00509236	-0.0780439	0.00340176	-0.910331	0.0893431	-3.35626	2.59012e-14		GAREM1
3033	HADH	hydroxyacyl-CoA dehydrogenase	-0.917774	18.077	-0.163389	0.00497361	-0.895003	0.0129144	-0.869716	0.0955883	-0.603422	7.64973e-06		HADH
57685	CACHD1	cache domain containing 1	-0.210017	25.6325	-0.21869	0.004664	-0.071692	0.00701573	-0.124649	0.00797374	-1.24036	0.0116951		CACHD1
3575	IL7R	interleukin 7 receptor	-0.607938	30.2817	-0.00734895	0.0045325	-0.0692497	0.00759501	-0.190778	0.0988293	-2.72279	7.53496e-06		IL7R
2202	EFEMP1	EGF containing fibulin extracellular matrix protein 1	-0.279211	16.3007	-0.56705	0.0045124	-0.0017358	0.0986543	-0.196496	0.0845872	-3.76699	4.76237e-13		EFEMP1
5031	P2RY6	pyrimidinergic receptor P2Y6	-0.191557	10.0077	-0.262341	0.0043949	-0.0697538	0.0474537	-0.162423	0.00797374	-3.0894	3.69066e-11		P2RY6
6402	SELL	selectin L	-0.54072	57.84	-0.01762	0.00438732	-0.268747	3.2598e-08	-0.286493	0.0821747	-5.01944	6.25294e-08		SELL
23321	TRIM2	tripartite motif containing 2	-0.182337	13.4609	-0.00326604	0.00434659	-0.46028	0.0200339	-0.973916	0.0805354	-1.53805	0.00153698		TRIM2
5795	PTPRJ	protein tyrosine phosphatase receptor type J	-0.111467	6.98088	-0.0140385	0.00421679	-0.0677791	0.00708456	-0.1146	0.00797374	-0.420746	0.0119047		PTPRJ
51284	TLR7	toll like receptor 7	-0.00356524	32.209	-0.618112	0.0038398	-0.134626	1.34763e-07	-0.21178	0.0870175	-3.26878	2.17834e-08		TLR7
7106	TSPAN4	tetraspanin 4	-0.140945	17.2555	-0.263742	0.00379394	-0.150146	0.0839143	-0.212918	0.0924	-0.270282	0.090501		TSPAN4
27303	RBMS3	RNA binding motif single stranded interacting protein 3	-0.237019	18.6229	-0.225831	0.00378757	-0.899453	0.0305375	-0.456939	0.0903436	-2.29293	1.31453e-09		RBMS3
2752	GLUL	glutamate-ammonia ligase	-0.16922	15.4892	-0.201865	0.00377234	-0.403154	3.92699e-14	-0.184431	0.00797374	-1.62221	2.23209e-12		GLUL
2289	FKBP5	FKBP prolyl isomerase 5	-0.146446	10.0033	-0.255651	0.00338704	-0.110153	0.0678654	-0.186518	0.080387	-0.460961	0.0282225		FKBP5
8727	CTNNAL1	catenin alpha like 1	-0.00747424	6.1019	-0.0139038	0.00338704	-0.136728	0.00303071	-0.418148	0.0885231	-1.51886	5.29098e-09		CTNNAL1
10194	TSHZ1	teashirt zinc finger homeobox 1	-0.143994	13.8656	-0.269152	0.00337031	-0.585236	0.0260142	-0.208698	0.00797374	-0.23088	0.0859921		TSHZ1
57569	ARHGAP20	Rho GTPase activating protein 20	-0.280238	29.2814	-0.00340531	0.00328767	-0.0285859	0.0964803	-0.10442	0.0918476	-2.35899	0.00311853		ARHGAP20
23612	PHLDA3	pleckstrin homology like domain family A member 3	-0.27834	24.6976	-0.251052	0.00324518	-0.13945	2.22816e-07	-0.628	0.0999032	-1.75126	1.51575e-08		PHLDA3
7100	TLR5	toll like receptor 5	-0.00351512	31.6447	-0.175152	0.00668698	-0.232794	1.65197e-08	-0.238155	0.0899029	-0.954278	7.77615e-06		TLR5
2200	FBN1	fibrillin 1	-0.973762	11.4332	-0.00370463	0.00320478	-0.60055	2.93761e-44	-0.124293	0.00797374	-1.06785	0.00138089		FBN1
8854	ALDH1A2	aldehyde dehydrogenase 1 family member A2	-0.25837	13.8092	-0.0141881	0.00290497	-0.438122	0.0183515	-0.179907	0.0815166	-0.248052	0.00734612		ALDH1A2
92106	OXNAD1	oxidoreductase NAD binding domain containing 1	-0.551106	15.4795	-0.295458	0.00282603	-0.173023	0.0522187	-0.411258	0.0858918	-0.68689	5.40708e-07		OXNAD1
79668	PARP8	poly(ADP-ribose) polymerase family member 8	-0.273845	24.5581	-0.553993	0.00282603	-0.161421	0.0405718	-0.108268	0.00797374	-1.62715	5.49447e-10		PARP8
3579	CXCR2	C-X-C motif chemokine receptor 2	-0.46751	33.3323	-1.02246	0.00267249	-0.0225836	0.0559848	-0.232234	0.0841015	-0.525068	0.0822138		CXCR2
3419	IDH3A	isocitrate dehydrogenase (NAD(+)) 3 catalytic subunit alpha	-0.890183	14.6279	-0.266714	0.00267249	-0.186319	0.0602282	-0.171184	0.094657	-0.169035	6.13361e-09		IDH3A
10040	TOM1L1	target of myb1 like 1 membrane trafficking protein	-0.180199	15.937	-0.0138391	0.00239862	-0.0881009	0.0135424	-0.108793	0.0804663	-1.8745	6.00315e-08		TOM1L1
7474	WNT5A	Wnt family member 5A	-0.132286	11.9549	-0.423719	0.00232477	-0.00769369	0.0957588	-0.216785	0.00797374	-2.75514	1.44733e-10		WNT5A
4914	NTRK1	neurotrophic receptor tyrosine kinase 1	-0.496256	13.9147	-0.472965	0.00232477	-0.0604699	0.00750464	-0.193521	0.0861244	-0.848582	0.100299		NTRK1
1902	LPAR1	lysophosphatidic acid receptor 1	-0.254715	29.4236	-0.0141437	0.00232477	-0.449528	5.50735e-28	-0.115643	0.0938721	-0.157922	0.00799932		LPAR1
	*	Cancer cells
	**	Mouse decidua MSC
	***	Cardiac intersticial MSC
	****	Bone marrow MSC
	*****	Human decidua MSC																																												bivalent		BOK
