# Supplementary material for: Polyploidy Promotes Hypertranscription, Apoptosis Resistance, and Ciliogenesis in Cancer Cells and Mesenchymal Stem Cells of Various Origins: Comparative Transcriptome In Silico Study
Source: Int J Mol Sci. 2024 Apr 10;25(8):4185. doi: 10.3390/ijms25084185 (PMC11050069; doi:10.3390/ijms25084185)
Supplement: Supplementary file 1 [file ijms-25-04185-s001.zip › Supplementary Table S4 DOWN_105 _OK_.xlsx]

## Sheet: Лист1
		Supplementary Table S4. Consensus ploidy -down-regulated master regulators in polyploid vs diploid cancer and MSC cells (105 gene gene set ) identified by PIEA
Include	NCBIid	Symb	Pway_comment	n_sample	N_popul	tot_sample	tot_popul	fract_ratio	qvalue	LL_IDs	GO_terms
1	596	BCL2	BCL2 apoptosis regulator	32	643	105	18663	8.59997	1.036e-17	308; 329; 330; 488; 567; 573; 578; 627; 666; 695; 840; 940; 1025; 1026; 1390; 1958; 3309; 3553; 3575; 3932; 4914; 5520; 5567; 5599; 7159; 8660; 8678; 8878; 9531; 10018; 26353; 29126
1	3553	IL1B	interleukin 1 beta	33	790	105	18663	7.21846	2.333e-16	301; 308; 330; 467; 567; 596; 627; 695; 940; 961; 1026; 1154; 1958; 2289; 3309; 3559; 3566; 3575; 3579; 5467; 5567; 5599; 6352; 6402; 7096; 7098; 7100; 8678; 8878; 10663; 29126; 51284; 54472
1	308	ANXA5	annexin A5	18	279	105	18663	11.1487	2.353e-11	301; 329; 330; 596; 840; 940; 1026; 3309; 3553; 3575; 3932; 5599; 6402; 8678; 8878; 9531; 10018; 29126
1	29126	CD274	CD274 molecule	19	343	105	18663	9.57232	5.769e-11	308; 567; 596; 695; 940; 961; 3309; 3553; 3559; 3575; 3579; 3932; 4914; 6352; 6402; 7098; 7100; 8744; 51284
1	8678	BECN1	beclin 1	18	320	105	18663	9.72031	1.685e-10	308; 329; 330; 408; 578; 596; 666; 840; 1154; 2289; 3309; 3553; 5599; 7098; 8878; 9531; 10018; 51284
1	10018	BCL2L11	BCL2 like 11	14	167	105	18663	14.4867	3.486e-10	308; 329; 330; 578; 596; 666; 695; 840; 1026; 1154; 3309; 3575; 5599; 8678
1	467	ATF3	activating transcription factor 3	12	125	105	18663	16.5893	2.382e-09	627; 1026; 1390; 1847; 1958; 3309; 3553; 5599; 8013; 8878; 23764; 64651
1	3575	IL7R	interleukin 7 receptor	16	305	105	18663	9.06521	5.967e-09	308; 596; 940; 1154; 3398; 3553; 3559; 3566; 3932; 6352; 6402; 8660; 10018; 10663; 29126; 51284
1	8878	SQSTM1	sequestosome 1	17	360	105	18663	8.16026	6.686e-09	308; 467; 596; 1025; 1026; 2060; 3309; 3398; 3553; 3799; 3932; 4914; 7052; 8678; 9531; 26353; 54472
1	6352	CCL5	C-C motif chemokine ligand 5	16	339	105	18663	8.15601	2.225e-08	301; 567; 940; 3553; 3559; 3575; 3579; 4914; 5599; 6402; 7096; 7098; 7100; 10663; 29126; 51284
1	3309	HSPA5	heat shock protein family A (Hsp70) member 5	17	422	105	18663	6.96136	5.355e-08	308; 467; 488; 498; 567; 573; 596; 840; 1915; 3553; 5599; 8678; 8878; 9531; 10018; 22824; 29126
1	51284	TLR7	toll like receptor 7	13	218	105	18663	10.3049	6.521e-08	695; 940; 3553; 3559; 3575; 3932; 6352; 6402; 7096; 7098; 7100; 8678; 29126
1	406	BMAL1	basic helix-loop-helix ARNT like 1	10	111	105	18663	15.5681	1.284e-07	627; 1408; 1628; 3131; 3398; 5187; 6256; 8553; 25819; 79365
1	3932	LCK	LCK proto-oncogene, Src family tyrosine kinase	14	288	105	18663	8.40027	1.737e-07	308; 567; 596; 695; 940; 1154; 3559; 3575; 6402; 7096; 8726; 8878; 29126; 51284
1	840	CASP7	caspase 7	9	93	105	18663	16.7231	4.351e-07	308; 329; 330; 578; 596; 3309; 6709; 8678; 10018
1	1628	DBP	D-box binding PAR bZIP transcription factor	6	26	105	18663	39.8782	8.19e-07	406; 1408; 3131; 5187; 9377; 79365
1	1958	EGR1	early growth response 1	12	228	105	18663	9.09503	9.716e-07	467; 596; 627; 1026; 1847; 3553; 8013; 8553; 8726; 9219; 22955; 64651
1	6402	SELL	selectin L	12	237	105	18663	8.74965	1.426e-06	308; 940; 961; 3553; 3559; 3575; 3579; 3932; 6352; 10663; 29126; 51284
1	940	CD28	CD28 molecule	12	262	105	18663	7.91476	3.846e-06	308; 567; 596; 3553; 3559; 3575; 3932; 6352; 6402; 8744; 29126; 51284
1	5187	PER1	period circadian regulator 1	6	36	105	18663	28.8009	5.157e-06	406; 1390; 1408; 1628; 8553; 79365
1	9531	BAG3	BAG cochaperone 3	9	136	105	18663	11.4357	8.159e-06	308; 573; 596; 3309; 8678; 8878; 22824; 26353; 26524
1	1408	CRY2	cryptochrome circadian regulator 2	7	68	105	18663	17.7888	1.085e-05	406; 1628; 3131; 5187; 8553; 25819; 79365
1	8553	BHLHE40	basic helix-loop-helix family member e40	6	44	105	18663	23.5644	1.525e-05	406; 1408; 1958; 5187; 6256; 79365
1	7098	TLR3	toll like receptor 3	11	247	105	18663	7.69579	1.534e-05	301; 329; 330; 3553; 6352; 7096; 7100; 8678; 29126; 51284; 54472
1	5599	MAPK8	mitogen-activated protein kinase 8	13	381	105	18663	5.89625	2.293e-05	308; 467; 596; 1026; 1847; 3309; 3553; 3799; 6352; 8660; 8678; 10018; 54948
1	3559	IL2RA	interleukin 2 receptor subunit alpha	10	209	105	18663	8.26821	2.639e-05	940; 3553; 3566; 3575; 3932; 6352; 6402; 10663; 29126; 51284
1	1026	CDKN1A	cyclin dependent kinase inhibitor 1A	12	326	105	18663	6.36094	2.862e-05	308; 467; 596; 1025; 1958; 3398; 3553; 5599; 8878; 9759; 10018; 26524
1	79365	BHLHE41	basic helix-loop-helix family member e41	5	32	105	18663	27.0009	6.589e-05	406; 1408; 1628; 5187; 8553
1	7100	TLR5	toll like receptor 5	7	95	105	18663	12.733	8.007e-05	3553; 6352; 7096; 7098; 29126; 51284; 54472
1	573	BAG1	BAG cochaperone 1	6	67	105	18663	15.4751	0.0001372	596; 3309; 7159; 9531; 22824; 26353
1	578	BAK1	BCL2 antagonist/killer 1	6	71	105	18663	14.6033	0.0001837	596; 666; 823; 840; 8678; 10018
1	330	BIRC3	baculoviral IAP repeat containing 3	8	163	105	18663	8.48125	0.0002456	308; 329; 596; 840; 3553; 7098; 8678; 10018
1	666	BOK	BCL2 family apoptosis regulator BOK	4	21	105	18663	32.9153	0.0002939	578; 596; 8678; 10018
1	329	BIRC2	baculoviral IAP repeat containing 2	8	169	105	18663	8.18014	0.0003105	308; 330; 596; 695; 840; 7098; 8678; 10018
1	1390	CREM	cAMP responsive element modulator	5	46	105	18663	18.7832	0.0003289	467; 596; 5187; 5567; 8013
1	695	BTK	Bruton tyrosine kinase	10	290	105	18663	5.95881	0.0003454	301; 329; 567; 596; 3553; 3932; 10018; 10672; 29126; 51284
1	3579	CXCR2	C-X-C motif chemokine receptor 2	8	173	105	18663	7.99101	0.0003583	408; 3553; 6002; 6352; 6402; 10663; 10672; 29126
1	567	B2M	beta-2-microglobulin	10	294	105	18663	5.87774	0.0003844	596; 627; 695; 940; 1915; 3309; 3553; 3932; 6352; 29126
1	3131	HLF	HLF transcription factor, PAR bZIP family member	4	28	105	18663	24.6865	0.0008397	406; 1408; 1628; 9377
1	10663	CXCR6	C-X-C motif chemokine receptor 6	7	157	105	18663	7.70471	0.001441	408; 3553; 3559; 3575; 3579; 6352; 6402
1	7096	TLR1	toll like receptor 1	6	121	105	18663	8.56887	0.002629	3553; 3932; 6352; 7098; 7100; 51284
1	1376	CPT2	carnitine palmitoyltransferase 2	5	77	105	18663	11.2211	0.00294	3033; 3295; 5467; 6256; 6342
1	4914	NTRK1	neurotrophic receptor tyrosine kinase 1	8	260	105	18663	5.31709	0.004265	408; 596; 627; 6352; 8660; 8878; 23327; 29126
1	301	ANXA1	annexin A1	6	136	105	18663	7.62377	0.004381	308; 695; 3553; 6352; 7052; 7098
1	498	ATP5F1A	ATP synthase F1 subunit alpha	10	421	105	18663	4.10465	0.005082	488; 1743; 1915; 3309; 3419; 9377; 27089; 27235; 51444; 54948
1	54472	TOLLIP	toll interacting protein	4	49	105	18663	14.1066	0.005522	3553; 7098; 7100; 8878
1	9377	COX5A	cytochrome c oxidase subunit 5A	7	208	105	18663	5.81557	0.006108	498; 1355; 1628; 1743; 3131; 3419; 27089
1	627	BDNF	brain derived neurotrophic factor	9	380	105	18663	4.09276	0.009586	406; 467; 567; 596; 1958; 2289; 3553; 4914; 5567
1	1154	CISH	cytokine inducible SH2 containing protein	5	111	105	18663	7.78403	0.010181	3553; 3575; 3932; 8678; 10018
1	408	ARRB1	arrestin beta 1	12	678	105	18663	3.05851	0.010353	501; 2060; 3579; 4914; 5029; 5520; 5567; 8678; 8775; 10663; 10717; 23327
1	3398	ID2	inhibitor of DNA binding 2	4	66	105	18663	10.4731	0.010393	406; 1026; 3575; 8878
1	6256	RXRA	retinoid X receptor alpha	7	247	105	18663	4.89732	0.010403	406; 1376; 5467; 8553; 8726; 9759; 55090
1	1025	CDK9	cyclin dependent kinase 9	7	251	105	18663	4.81928	0.010504	596; 1026; 2289; 2962; 8878; 55090; 133522
1	8013	NR4A3	nuclear receptor subfamily 4 group A member 3	3	31	105	18663	16.7231	0.010709	467; 1390; 1958
1	26353	HSPB8	heat shock protein family B (small) member 8	4	77	105	18663	8.97691	0.02017	573; 596; 8878; 9531
1	8660	IRS2	insulin receptor substrate 2	5	133	105	18663	6.49645	0.020205	596; 3566; 3575; 4914; 5599
1	1847	DUSP5	dual specificity phosphatase 5	3	36	105	18663	14.4005	0.02036	467; 1958; 5599
1	2289	FKBP5	FKBP prolyl isomerase 5	4	95	105	18663	7.27602	0.030483	627; 1025; 3553; 8678
1	3419	IDH3A	isocitrate dehydrogenase (NAD(+)) 3 catalytic subunit alpha	4	96	105	18663	7.20023	0.030598	498; 594; 1743; 9377
1	5467	PPARD	peroxisome proliferator activated receptor delta	4	108	105	18663	6.40021	0.040785	1376; 3553; 6256; 133522
1	55090	MED9	mediator complex subunit 9	4	109	105	18663	6.34149	0.040921	1025; 2962; 6256; 133522
1	1743	DLST	dihydrolipoamide S-succinyltransferase	4	116	105	18663	5.95881	0.050757	498; 594; 3419; 9377
1	64651	CSRNP1	cysteine and serine rich nuclear protein 1	2	18	105	18663	19.2006	0.050845	467; 1958
1	501	ALDH7A1	aldehyde dehydrogenase 7 family member A1	4	132	105	18663	5.23653	0.008005	408; 5142; 5567; 27165
1	25819	NOCT	nocturnin	2	24	105	18663	14.4005	0.009021	406; 1408
1	8726	EED	embryonic ectoderm development	5	216	105	18663	4.00013	0.009023	1958; 3932; 6256; 9219; 22955
1	6709	SPTAN1	spectrin alpha, non-erythrocytic 1	4	140	105	18663	4.9373	0.029444	823; 840; 3799; 8775
1	22824	HSPA4L	heat shock protein family A (Hsp70) member 4 like	3	75	105	18663	6.91222	0.02859	573; 3309; 9531
1	3566	IL4R	interleukin 4 receptor	4	152	105	18663	4.54751	0.04176	3553; 3559; 3575; 8660
1	5142	PDE4B	phosphodiesterase 4B	2	104	105	18663	3.32318	0.02217	501; 5567
1	594	BCKDHB	branched chain keto acid dehydrogenase E1 subunit beta	2	99	105	18663	3.49102	0.05903	1743; 3419
1	9759	HDAC4	histone deacetylase 4	3	216	105	18663	2.40008	0.06477	1026; 5520; 6256
1	23764	MAFF	MAF bZIP transcription factor F	2	24	105	18663	7.20023	0.06477	467;501
1	10672	GNA13	G protein subunit alpha 13	4	160	105	18663	4.32014	0.010348	695; 3579; 6002; 8775
1	51444	RNF138	ring finger protein 138	2	28	105	18663	6.17163	0.07152	498;4914
1	2060	EPS15	epidermal growth factor receptor pathway substrate 15	4	168	105	18663	4.11442	0.08525	408; 8878; 10717; 23327
1	22955	SCMH1	Scm polycomb group protein homolog 1	3	95	105	18663	5.45702	0.010606	1958; 8726; 9219
1	5567	PRKACB	protein kinase cAMP-activated catalytic subunit beta	7	814	105	18663	1.48604	0.02428	408; 501; 596; 627; 1390; 3553; 5142
1	7052	TGM2	transglutaminase 2	2	37	105	18663	9.34084	0.01718	301; 8878
1	133522	PPARGC1B	PPARG coactivator 1 beta	3	99	105	18663	5.23653	0.04049	1025; 5467; 55090
1	10717	AP4B1	adaptor related protein complex 4 subunit beta 1	3	104	105	18663	4.98478	0.0917	408; 2060; 8775
1	1355	COX15	cytochrome c oxidase assembly homolog COX15	3	106	105	18663	4.89072	0.0183	2235; 9377; 27089
1	8775	NAPA	NSF attachment protein alpha	4	191	105	18663	3.61896	0.02074	408; 6709; 10672; 10717
1	488	ATP2A2	ATPase sarcoplasmic/endoplasmic reticulum Ca2+ transporting 2	3	109	105	18663	4.75612	0.1021	498; 596; 3309
1	5029	P2RY2	purinergic receptor P2Y2	2	44	105	18663	3.9274	0.109249	408; 627
1	3033	HADH	hydroxyacyl-CoA dehydrogenase	3	112	105	18663	4.62872	0.102199	1376; 3295; 6342
1	7159	TP53BP2	tumor protein p53 binding protein 2	2	45	105	18663	7.68025	0.10223	573; 596
1	27165	GLS2	glutaminase 2	3	60	105	18663	2.88009	0.101524	501;9531;1026
1	9219	MTA2	metastasis associated 1 family member 2	3	116	105	18663	4.46911	0.102339	1958; 8726; 22955
1	3799	KIF5B	kinesin family member 5B	3	194	105	18663	2.67225	0.10578	5599; 6709; 8878
1	27089	UQCRQ	ubiquinol-cytochrome c reductase complex III subunit VII	3	165	105	18663	3.14192	0.104341	498; 1355; 9377
1	1915	EEF1A1	eukaryotic translation elongation factor 1 alpha 1	3	340	105	18663	1.52475	0.103251	498; 567; 3309
1	823	CAPN1	calpain 1	2	49	105	18663	7.05329	0.102507	578; 6709
1	26524	LATS2	large tumor suppressor kinase 2	2	64	105	18663	5.40017	0.103525	1026; 9531
1	2962	GTF2F1	general transcription factor IIF subunit 1	2	214	105	18663	1.61501	0.123251	1025; 55090
1	27235	COQ2	coenzyme Q2, polyprenyltransferase	2	84	105	18663	2.05721	0.102541	498;628
1	3295	HSD17B4	hydroxysteroid 17-beta dehydrogenase 4	3	129	105	18663	4.01873	0.02844	1376; 3033; 6342
1	8744	TNFSF9	TNF superfamily member 9	2	54	105	18663	6.40021	0.102844	940; 29126
1	6342	SCP2	sterol carrier protein 2	3	132	105	18663	3.9274	0.102944	1376; 3033; 3295
1	6002	RGS12	regulator of G protein signaling 12	2	63	105	18663	5.48589	0.103444	3579; 10672
1	961	CD47	CD47 molecule	3	152	105	18663	3.41064	0.103783	3553; 6402; 29126
1	23327	NEDD4L	NEDD4 like E3 ubiquitin protein ligase	3	146	105	18663	3.5508	0.103525	408; 2060; 4914
1	5520	PPP2R2A	protein phosphatase 2 regulatory subunit Balpha	3	160	105	18663	3.2401	0.104122	408; 596; 9759
1	2235	FECH	ferrochelatase	2	124	105	18663	1.39359	0.102598	1355;573
1	54948	MRPL16	mitochondrial ribosomal protein L16	2	340	105	18663	1.0165	0.103255	498; 5599
