# Supplementary material for: Polyploidy Promotes Hypertranscription, Apoptosis Resistance, and Ciliogenesis in Cancer Cells and Mesenchymal Stem Cells of Various Origins: Comparative Transcriptome In Silico Study
Source: Int J Mol Sci. 2024 Apr 10;25(8):4185. doi: 10.3390/ijms25084185 (PMC11050069; doi:10.3390/ijms25084185)
Supplement: Supplementary file 1 [file ijms-25-04185-s001.zip › Supplementary Table S5_Ips_Up (233 gene set)_OK_.xlsx]

## Sheet: Лист1
	Supplementary Table S5. Ploidy -upregulated genes in polyploid vs diploid cardiac progenitors (CP) derived from iPS (233 gene set )																																						GMPPA				CNOT2					COMMD2
	NCBIid	Symb	Annot	FC_iPSC_cardiac_Circ21_d2	adjPVal_iPSC_cardiac_Circ21_d2
	8497	PPFIA4	PTPRF interacting protein alpha 4	0.0685018	0.0330808
	221424	LRRC73	leucine rich repeat containing 73	0.0859743	0.0430087
	7448	VTN	vitronectin	0.0917163	0.0376706
	154467	CCDC167	coiled-coil domain containing 167	0.0963421	0.0105144
	91147	TMEM67	transmembrane protein 67	0.097379	0.0913997
	58485	TRAPPC1	trafficking protein particle complex subunit 1	0.0100561	0.00830083
	11187	PKP3	plakophilin 3	0.0182896	0.00609463
	64599	GIGYF1	GRB10 interacting GYF protein 1	0.0183022	0.0431088
	28985	MCTS1	MCTS1 re-initiation and release factor	0.0140538	0.0366794
	9841	ZBTB24	zinc finger and BTB domain containing 24	0.0140977	0.00976202
	26502	NARF	nuclear prelamin A recognition factor	0.0149105	0.00811781
	94239	H2AZ2	H2A.Z variant histone 2	0.0157662	0.00956659
	29926	GMPPA	GDP-mannose pyrophosphorylase A	0.0161586	0.00982657
	6601	SMARCC2	SWI/SNF related, matrix associated, actin dependent regulator of chromatin subfamily c member 2	0.0180935	0.043456
	64753	CCDC136	coiled-coil domain containing 136	0.0181641	0.00628351
	83933	HDAC10	histone deacetylase 10	0.0188876	0.00662712
	51071	DERA	deoxyribose-phosphate aldolase	0.0195783	0.0437498
	7013	TERF1	telomeric repeat binding factor 1	0.0115566	0.00950537
	51119	SBDS	SBDS ribosome maturation factor	0.0111645	0.00939112
	1639	DCTN1	dynactin subunit 1	0.0112128	0.0433881
	2519	FUCA2	alpha-L-fucosidase 2	0.0112574	0.00972923
	4040	LRP6	LDL receptor related protein 6	0.01132	0.0434551
	10208	USPL1	ubiquitin specific peptidase like 1	0.0114589	0.00952306
	116064	LRRC58	leucine rich repeat containing 58	0.0115286	0.0365711
	537	ATP6AP1	ATPase H+ transporting accessory protein 1	0.0115703	0.0491838
	7994	KAT6A	lysine acetyltransferase 6A	0.0117426	0.0422742
	254065	BRWD3	bromodomain and WD repeat domain containing 3	0.0118363	0.0466185
	3927	LASP1	LIM and SH3 protein 1	0.0121088	0.046477
	10897	YIF1A	Yip1 interacting factor homolog A, membrane trafficking protein	0.0122236	0.00950097
	4848	CNOT2	CCR4-NOT transcription complex subunit 2	0.0124245	0.0477407
	54916	TMEM260	transmembrane protein 260	0.0127049	0.0366127
	55743	CHFR	checkpoint with forkhead and ring finger domains	0.0127067	0.0093735
	65009	NDRG4	NDRG family member 4	0.0128666	0.00994103
	6483	ST3GAL2	ST3 beta-galactoside alpha-2,3-sialyltransferase 2	0.0132094	0.043318
	9696	CROCC	ciliary rootlet coiled-coil, rootletin	0.0132573	0.00940385
	949	SCARB1	scavenger receptor class B member 1	0.0133277	0.0435141
	55297	CCDC91	coiled-coil domain containing 91	0.0142834	0.0439063
	9049	AIP	aryl hydrocarbon receptor interacting protein	0.0145024	0.00927963
	26580	BSCL2	BSCL2 lipid droplet biogenesis associated, seipin	0.0145306	0.00629906
	57348	TTYH1	tweety family member 1	0.0146409	0.0366851
	6045	RNF2	ring finger protein 2	0.0147745	0.0450588
	6045	RNF2	ring finger protein 2	0.0147745	0.0450588
	114823	LENG8	leukocyte receptor cluster member 8	0.0149153	0.0436166
	5062	PAK2	p21 (RAC1) activated kinase 2	0.0149547	0.00855009
	27241	BBS9	Bardet-Biedl syndrome 9	0.0150567	0.00827238
	8886	DDX18	DEAD-box helicase 18	0.0151193	0.0421476
	23322	RPGRIP1L	RPGRIP1 like	0.0151633	0.00922167
	5052	PRDX1	peroxiredoxin 1	0.0152201	0.0300322
	23583	SMUG1	single-strand-selective monofunctional uracil-DNA glycosylase 1	0.0152541	0.00954392
	160897	GPR180	G protein-coupled receptor 180	0.0153671	0.00905062
	22818	COPZ1	COPI coat complex subunit zeta 1	0.0153897	0.0356142
	60314	MYG1	MYG1 exonuclease	0.0155145	0.0437227
	55238	SLC38A7	solute carrier family 38 member 7	0.0156065	0.0381643
	121441	NEDD1	NEDD1 gamma-tubulin ring complex targeting factor	0.0158097	0.047254
	1399	CRKL	CRK like proto-oncogene, adaptor protein	0.0158536	0.0361575
	91012	CERS5	ceramide synthase 5	0.0160215	0.045513
	50814	NSDHL	NAD(P) dependent steroid dehydrogenase-like	0.0161892	0.0475859
	79692	ZNF322	zinc finger protein 322	0.0162009	0.0094639
	11022	TDRKH	tudor and KH domain containing	0.0163191	0.0366387
	252839	TMEM9	transmembrane protein 9	0.0164046	0.0494992
	221955	DAGLB	diacylglycerol lipase beta	0.0164331	0.0489745
	54619	CCNJ	cyclin J	0.0164616	0.0387187
	122961	ISCA2	iron-sulfur cluster assembly 2	0.016668	0.00907725
	10682	EBP	EBP cholestenol delta-isomerase	0.0169526	0.0488001
	3720	JARID2	jumonji and AT-rich interaction domain containing 2	0.0170836	0.00921708
	3015	H2AZ1	H2A.Z variant histone 1	0.0171448	0.0380583
	11267	SNF8	SNF8 subunit of ESCRT-II	0.0171978	0.0447185
	440026	TMEM41B	transmembrane protein 41B	0.0172239	0.0487916
	55219	MACO1	macoilin 1	0.0172404	0.0445634
	9371	KIF3B	kinesin family member 3B	0.0172581	0.0362031
	90957	DHX57	DExH-box helicase 57	0.0174921	0.0433172
	22877	MLXIP	MLX interacting protein	0.0175199	0.0425973
	11183	MAP4K5	mitogen-activated protein kinase kinase kinase kinase 5	0.0176055	0.0435381
	65980	BRD9	bromodomain containing 9	0.0176977	0.00985991
	84519	ACRBP	acrosin binding protein	0.0180283	0.036885
	51184	GPN3	GPN-loop GTPase 3	0.0182942	0.0439154
	89845	ABCC10	ATP binding cassette subfamily C member 10	0.0184249	0.0447702
	55689	YEATS2	YEATS domain containing 2	0.0185285	0.0310738
	6903	TBCC	tubulin folding cofactor C	0.0186373	0.0430238
	57468	SLC12A5	solute carrier family 12 member 5	0.0187587	0.00609903
	9617	MTRF1	mitochondrial translation release factor 1	0.0189021	0.0435367
	3481	IGF2	insulin like growth factor 2	0.0194001	0.00688726
	5681	PSKH1	protein serine kinase H1	0.0195092	0.042922
	10902	BRD8	bromodomain containing 8	0.0196501	0.0362009
	7750	ZMYM2	zinc finger MYM-type containing 2	0.0197294	0.0248168
	84186	ZCCHC7	zinc finger CCHC-type containing 7	0.0198274	0.0485866
	4651	MYO10	myosin X	0.0199071	0.0289203
	1069	CETN2	centrin 2	0.0209144	0.0361377
	84542	SANBR	SANT and BTB domain regulator of CSR	0.0222153	0.0362067
	51107	APH1A	aph-1 homolog A, gamma-secretase subunit	0.0223599	0.0368945
	7756	ZNF207	zinc finger protein 207	0.0232587	0.00665615
	51319	RSRC1	arginine and serine rich coiled-coil 1	0.0232602	0.0363425
	79576	NKAP	NFKB activating protein	0.0255616	0.0362627
	11171	STRAP	serine/threonine kinase receptor associated protein	0.0258394	0.00604758
	5255	PHKA1	phosphorylase kinase regulatory subunit alpha 1	0.0262135	0.0365746
	100	ADA	adenosine deaminase	0.0268938	0.0367812
	988	CDC5L	cell division cycle 5 like	0.0278601	0.00675169
	55129	ANO10	anoctamin 10	0.0280067	0.0360368
	1072	CFL1	cofilin 1	0.0297494	0.00807174
	6788	STK3	serine/threonine kinase 3	0.0306788	0.0360396
	5914	RARA	retinoic acid receptor alpha	0.031218	0.0270811
	55973	BCAP29	B cell receptor associated protein 29	0.0322694	0.0269584
	23623	RUSC1	RUN and SH3 domain containing 1	0.032295	0.0173003
	3189	HNRNPH3	heterogeneous nuclear ribonucleoprotein H3	0.0329077	0.0543381
	146705	TEPSIN	TEPSIN adaptor related protein complex 4 accessory protein	0.0331084	0.0331156
	55257	MRGBP	MRG domain binding protein	0.0331361	0.0294184
	29100	TMEM208	transmembrane protein 208	0.0340224	0.0302489
	2887	GRB10	growth factor receptor bound protein 10	0.0346393	0.0709395
	81669	CCNL2	cyclin L2	0.034862	0.0972683
	7072	TIA1	TIA1 cytotoxic granule associated RNA binding protein	0.0350514	0.00648986
	4521	NUDT1	nudix hydrolase 1	0.0353837	0.0334473
	79035	NABP2	nucleic acid binding protein 2	0.0353957	0.0209809
	5360	PLTP	phospholipid transfer protein	0.0358726	0.0155964
	51594	NBAS	NBAS subunit of NRZ tethering complex	0.0363661	0.0794546
	2649	NR6A1	nuclear receptor subfamily 6 group A member 1	0.0365049	0.00693094
	91544	UBXN11	UBX domain protein 11	0.0366585	0.0362346
	64792	IFT22	intraflagellar transport 22	0.0373544	0.0207169
	116840	CNTROB	centrobin, centriole duplication and spindle assembly protein	0.0379136	0.0115095
	22843	PPM1E	protein phosphatase, Mg2+/Mn2+ dependent 1E	0.0380834	0.0446111
	140465	MYL6B	myosin light chain 6B	0.0380956	0.00667418
	56474	CTPS2	CTP synthase 2	0.038624	0.0282636
	7534	YWHAZ	tyrosine 3-monooxygenase/tryptophan 5-monooxygenase activation protein zeta	0.0391044	0.0435186
	7355	SLC35A2	solute carrier family 35 member A2	0.0392843	0.00690058
	6654	SOS1	SOS Ras/Rac guanine nucleotide exchange factor 1	0.0395629	0.00884554
	4905	NSF	N-ethylmaleimide sensitive factor, vesicle fusing ATPase	0.0395731	0.0257776
	8907	AP1M1	adaptor related protein complex 1 subunit mu 1	0.0427019	0.00643868
	125965	COX6B2	cytochrome c oxidase subunit 6B2	0.0431457	0.0434073
	747	DAGLA	diacylglycerol lipase alpha	0.0432287	0.0492849
	83693	HSDL1	hydroxysteroid dehydrogenase like 1	0.0432646	0.0577536
	150223	YDJC	YdjC chitooligosaccharide deacetylase homolog	0.043425	0.0980317
	80727	TTYH3	tweety family member 3	0.0434499	0.00818959
	8270	LAGE3	L antigen family member 3	0.0438642	0.0185964
	339287	MSL1	MSL complex subunit 1	0.0447466	0.00889372
	131601	TPRA1	transmembrane protein adipocyte associated 1	0.0453215	0.00694086
	23476	BRD8	bromodomain containing 4	0.0459187	0.00965896
	9689	BZW1	basic leucine zipper and W2 domains 1	0.0459261	0.00882133
	10644	IGF2BP2	insulin like growth factor 2 mRNA binding protein 2	0.0472073	0.00964044
	10955	SERINC3	serine incorporator 3	0.0529369	0.00848544
	8295	TRRAP	transformation/transcription domain associated protein	0.0533555	0.00974362
	83439	TCF7L1	transcription factor 7 like 1	0.0540807	0.00624628
	124401	ANKS3	ankyrin repeat and sterile alpha motif domain containing 3	0.0564875	0.00642092
	57609	DIP2B	disco interacting protein 2 homolog B	0.0575473	0.00853594
	54742	LY6K	lymphocyte antigen 6 family member K	0.0577735	0.0369692
	11321	GPN1	GPN-loop GTPase 1	0.0578177	0.00636054
	23481	PES1	pescadillo ribosomal biogenesis factor 1	0.059572	0.00811499
	10467	ZNHIT1	zinc finger HIT-type containing 1	0.0610594	0.0368157
	10285	SMNDC1	survival motor neuron domain containing 1	0.0616604	0.00842796
	84313	VPS25	vacuolar protein sorting 25 homolog	0.0636098	0.00873497
	10856	RUVBL2	RuvB like AAA ATPase 2	0.0662953	0.0181405
	55665	URGCP	upregulator of cell proliferation	0.067108	0.00633807
	84450	ZNF512	zinc finger protein 512	0.0681817	0.00895431
	80254	CEP63	centrosomal protein 63	0.0688546	0.00882832
	9451	EIF2AK3	eukaryotic translation initiation factor 2 alpha kinase 3	0.0691532	0.00606381
	10014	HDAC5	histone deacetylase 5	0.0712201	0.0367303
	55330	BLOC1S4	biogenesis of lysosomal organelles complex 1 subunit 4	0.0739962	0.00647619
	10362	HMG20B	high mobility group 20B	0.077406	0.00990304
	84668	HYCC1	hyccin PI4KA lipid kinase complex subunit 1	0.0795391	0.00988878
	9129	PRPF3	pre-mRNA processing factor 3	0.0797403	0.0095176
	6809	STX3	syntaxin 3	0.0810911	0.00834499
	87178	PNPT1	polyribonucleotide nucleotidyltransferase 1	0.0839281	0.036718
	55636	CHD7	chromodomain helicase DNA binding protein 7	0.0844215	0.0332779
	51693	TRAPPC2L	trafficking protein particle complex subunit 2L	0.0845171	0.00850226
	80011	PSME3IP1	proteasome activator subunit 3 interacting protein 1	0.0848543	0.0365836
	57634	EP400	E1A binding protein p400	0.086172	0.0430489
	6880	TAF9	TATA-box binding protein associated factor 9	0.0865912	0.00933365
	9950	GOLGA5	golgin A5	0.0873907	0.0366745
	3476	IGBP1	immunoglobulin binding protein 1	0.0876856	0.00852187
	6199	RPS6KB2	ribosomal protein S6 kinase B2	0.0893973	0.00999502
	23197	FAF2	Fas associated factor family member 2	0.0908877	0.00900541
	55110	MAGOHB	mago homolog B, exon junction complex subunit	0.0917507	0.00841882
	65985	AACS	acetoacetyl-CoA synthetase	0.0926531	0.0104618
	8575	PRKRA	protein activator of interferon induced protein kinase EIF2AK2	0.0934015	0.00966892
	203523	ZNF449	zinc finger protein 449	0.0941028	0.00895449
	51111	KMT5B	lysine methyltransferase 5B	0.0947227	0.00914076
	10951	CBX1	chromobox 1	0.0961662	0.04945
	51534	VTA1	vesicle trafficking 1	0.0964453	0.00919186
	55759	WDR12	WD repeat domain 12	0.0993793	0.00919586
	9129	PRPF3	pre-mRNA processing factor 3	0.181153	0.00923762
	10262	SF3B4	splicing factor 3b subunit 4	0.181153	0.00923762
	256643	BCLAF3	BCLAF1 and THRAP3 family member 3	0.20333	0.0463175
	286410	ATP11C	ATPase phospholipid transporting 11C	0.209605	0.0278737
	51122	COMMD2	COMM domain containing 2	0.215186	0.0392951
	197335	WDR90	WD repeat domain 90	0.216021	0.0402355
	10916	MAGED2	MAGE family member D2	0.217746	0.0322184
	55209	SETD5	SET domain containing 5	0.222589	0.00714033
	55209	SETD5	SET domain containing 5	0.222589	0.0714033
	80143	SIKE1	suppressor of IKBKE 1	0.226168	0.0282666
	3480	IGF1R	insulin like growth factor 1 receptor	0.228323	0.033793
	254048	UBN2	ubinuclein 2	0.229571	0.0204012
	152185	SPICE1	spindle and centriole associated protein 1	0.230157	0.0369484
	5610	EIF2AK2	eukaryotic translation initiation factor 2 alpha kinase 2	0.231082	0.0219657
	64210	MMS19	MMS19 homolog, cytosolic iron-sulfur assembly component	0.231195	0.0213872
	283237	TTC9C	tetratricopeptide repeat domain 9C	0.232732	0.0400375
	91408	BTF3L4	basic transcription factor 3 like 4	0.23436	0.0242967
	25852	ARMC8	armadillo repeat containing 8	0.237175	0.0276305
	55835	CENPJ	centromere protein J	0.215186	0.0433851
	4137	MAPT	microtubule associated protein tau	0.238623	0.0436131
	11222	MRPL3	mitochondrial ribosomal protein L3	0.239497	0.0299164
	10643	IGF2BP3	insulin like growth factor 2 mRNA binding protein 3	0.248273	0.00820147
	139886	SPIN4	spindlin family member 4	0.248594	0.0325843
	55773	TBC1D23	TBC1 domain family member 23	0.251816	0.0291381
	80312	TET1	tet methylcytosine dioxygenase 1	0.254991	0.0993994
	670	BPHL	biphenyl hydrolase like	0.2583	0.0466736
	6048	RNF5	ring finger protein 5	0.260837	0.0209817
	5881	RAC3	Rac family small GTPase 3	0.261273	0.024272
	25953	PNKD	PNKD metallo-beta-lactamase domain containing	0.266375	0.0380528
	26115	TANC2	tetratricopeptide repeat, ankyrin repeat and coiled-coil containing 2	0.267738	0.0260717
	221184	CPNE2	copine 2	0.268631	0.0347426
	84328	LZIC	leucine zipper and CTNNBIP1 domain containing	0.26871	0.0456255
	79752	ZFAND1	zinc finger AN1-type containing 1	0.273082	0.0333838
	60412	EXOC4	exocyst complex component 4	0.279247	0.0140809
	55791	LRIF1	ligand dependent nuclear receptor interacting factor 1	0.280323	0.0411519
	11142	PKIG	cAMP-dependent protein kinase inhibitor gamma	0.280499	0.0407322
	22897	CEP164	centrosomal protein 164	0.282467	0.0236622
	130827	TMEM182	transmembrane protein 182	0.284433	0.0358181
	30833	NT5C	5', 3'-nucleotidase, cytosolic	0.292954	0.0287148
	643836	ZFP62	ZFP62 zinc finger protein	0.295016	0.0227069
	6944	VPS72	vacuolar protein sorting 72 homolog	0.3589	0.0166192
	10994	ILVBL	ilvB acetolactate synthase like	0.40043	0.0131006
	84240	ZCCHC9	zinc finger CCHC-type containing 9	0.407989	0.0188869
	11020	IFT27	intraflagellar transport 27	0.412434	0.0163383
	53345	TM6SF2	transmembrane 6 superfamily member 2	0.418976	0.00803195
	3897	L1CAM	L1 cell adhesion molecule	0.420901	0.0306118
	9282	MED14	mediator complex subunit 14	0.425937	0.0173122
	90639	COX19	cytochrome c oxidase assembly factor COX19	0.429586	0.0185399
	729920	CRPPA	CDP-L-ribitol pyrophosphorylase A	0.460976	0.0403343
	90990	KIFC2	kinesin family member C2	0.470279	0.0180217
	147968	CAPN12	calpain 12	0.489843	0.0396144
	2332	FMR1	fragile X messenger ribonucleoprotein 1	0.49821	0.0189892
	63982	ANO3	anoctamin 3	1.02462	0.0305351
	6556	SLC11A1	solute carrier family 11 member 1	1.16215	0.0256852
	4356	MPP3	MAGUK p55 scaffold protein 3	1.21136	0.0520326
	3299	HSF4	heat shock transcription factor 4	1.40001	0.0152564
	3204	HOXA7	homeobox A7	1.45262	0.0209123
	85474	LBX2	ladybird homeobox 2	1.85491	0.0144627
	6676	SPAG4	sperm associated antigen 4	2.22932	0.04193
	55124	PIWIL2	piwi like RNA-mediated gene silencing 2	3.02143	0.0167205
	NCBIid	Symb	Annot	FC_iPSC_cardiac_Circ21_d2	adjPVal_iPSC_cardiac_Circ21_d2
	Supplementary Table 5. Ploidy -upregulated genes in polyploid vs diploid cardiac progenitors derived from iPS (233 gene set )																																						GMPPA				CNOT2					COMMD2
[truncated: 1 more columns]
