# Supplementary material for: Polyploidy Promotes Hypertranscription, Apoptosis Resistance, and Ciliogenesis in Cancer Cells and Mesenchymal Stem Cells of Various Origins: Comparative Transcriptome In Silico Study
Source: Int J Mol Sci. 2024 Apr 10;25(8):4185. doi: 10.3390/ijms25084185 (PMC11050069; doi:10.3390/ijms25084185)
Supplement: Supplementary file 1 [file ijms-25-04185-s001.zip › Supplementary Table S6 Ips DOWN 244_.xlsx]

## Sheet: Sheet1
	Supplementary Table S6. Ploidy -downregulated genes in polyploid vs diploid cardiac progenitors (CP) derived from iPS (244 gene set )																																						GMPPA				CNOT2					COMMD2
NCBIid	Symb	Annot	FC_iPSC_cardiac_Circ21_d2	adjPVal_iPSC_cardiac_Circ21_d2
406	BMAL1	basic helix-loop-helix ARNT like 1	-1.63424	0.0939158
79365	BHLHE41	basic helix-loop-helix family member e41	-1.56874	0.0407376
5101	PCDH9	protocadherin 9	-1.49649	0.003745
23237	ARC	activity regulated cytoskeleton associated protein	-1.45736	0.107524
51313	GASK1B	golgi associated kinase 1B	-1.42183	0.0330766
114792	KLHL32	kelch like family member 32	-1.40667	0.107303
2892	GRIA3	glutamate ionotropic receptor AMPA type subunit 3	-1.40058	0.0225087
5918	RARRES1	retinoic acid receptor responder 1	-1.34704	0.105158
1285	COL4A3	collagen type IV alpha 3 chain	-1.28717	0.0266123
29760	BLNK	B cell linker	-1.2507	0.0211472
5031	P2RY6	pyrimidinergic receptor P2Y6	-1.20202	0.0115906
2247	FGF2	fibroblast growth factor 2	-1.13729	0.102534
55259	DNAI7	dynein axonemal intermediate chain 7	-1.10562	0.0233276
1628	DBP	D-box binding PAR bZIP transcription factor	-1.00769	0.109594
596	BCL2	BCL2 apoptosis regulator	-0.986542	0.101424
7098	TLR3	toll like receptor 3	-0.978915	0.0282578
55466	DNAJA4	DnaJ heat shock protein family (Hsp40) member A4	-0.966603	0.0236073
7052	TGM2	transglutaminase 2	-0.949078	0.0406783
54843	SYTL2	synaptotagmin like 2	-0.92817	0.0335561
695	BTK	Bruton tyrosine kinase	-0.911997	0.0364772
695	BTK	Bruton tyrosine kinase	-0.911997	0.0364772
340719	NANOS1	nanos C2HC-type zinc finger 1	-0.864564	0.034923
25819	NOCT	nocturnin	-0.853755	0.0654675
330	BIRC3	baculoviral IAP repeat containing 3	-0.851921	0.0333858
57569	ARHGAP20	Rho GTPase activating protein 20	-0.849937	0.046971
1408	CRY2	cryptochrome circadian regulator 2	-0.848596	0.0883327
6352	CCL5	C-C motif chemokine ligand 5	-0.831658	0.0446851
6352	CCL5	C-C motif chemokine ligand 5	-0.831658	0.0446851
9967	THRAP3	thyroid hormone receptor associated protein 3	-0.825113	0.00492138
26353	HSPB8	heat shock protein family B (small) member 8	-0.818566	0.0871233
1847	DUSP5	dual specificity phosphatase 5	-0.815816	0.0974047
2354	FOSB	FosB proto-oncogene, AP-1 transcription factor subunit	-0.728937	0.0486587
81704	DOCK8	dedicator of cytokinesis 8	-0.70077	0.05096
1958	EGR1	early growth response 1	-0.659671	0.0412619
56255	TMX4	thioredoxin related transmembrane protein 4	-0.655445	0.0317376
874	CBR3	carbonyl reductase 3	-0.646816	0.0521704
23612	PHLDA3	pleckstrin homology like domain family A member 3	-0.645103	0.0200554
2353	FOS	Fos proto-oncogene, AP-1 transcription factor subunit	-0.616527	0.0274549
8553	BHLHE40	basic helix-loop-helix family member e40	-0.610673	8.32615e-12
81563	C1orf21	chromosome 1 open reading frame 21	-0.60789	0.105759
30061	SLC40A1	solute carrier family 40 member 1	-0.602189	0.0351403
124359	CDYL2	chromodomain Y like 2	-0.596695	0.0223615
64651	CSRNP1	cysteine and serine rich nuclear protein 1	-0.596572	0.0740057
467	ATF3	activating transcription factor 3	-0.584425	0.0443536
4914	NTRK1	neurotrophic receptor tyrosine kinase 1	-0.575861	0.0487402
5795	PTPRJ	protein tyrosine phosphatase receptor type J	-0.551817	0.106539
90293	KLHL13	kelch like family member 13	-0.545613	0.04611
2200	FBN1	fibrillin 1	-0.53975	0.0485883
627	BDNF	brain derived neurotrophic factor	-0.534031	0.0650849
27089	UQCRQ	ubiquinol-cytochrome c reductase complex III subunit VII	-0.525636	0.102384
6284	S100A13	S100 calcium binding protein A13	-0.520633	0.0321307
8553	BHLHE40	basic helix-loop-helix family member e40	-0.515419	0.0369236
8722	CTSF	cathepsin F	-0.515162	0.0725311
1435	CSF1	colony stimulating factor 1	-0.505401	0.0392661
7106	TSPAN4	tetraspanin 4	-0.504166	0.10639
5029	P2RY2	purinergic receptor P2Y2	-0.502858	0.033424
8061	FOSL1	FOS like 1, AP-1 transcription factor subunit	-0.50179	0.0469452
5328	PLAU	plasminogen activator, urokinase	-0.487498	0.0459098
57458	TMCC3	transmembrane and coiled-coil domain family 3	-0.485701	0.108911
3575	IL7R	interleukin 7 receptor	-0.477676	0.0651523
54206	ERRFI1	ERBB receptor feedback inhibitor 1	-0.472966	0.10391
9709	HERPUD1	homocysteine inducible ER protein with ubiquitin like domain 1	-0.464552	0.048286
10717	AP4B1	adaptor related protein complex 4 subunit beta 1	-0.46156	0.0261384
201501	ZBTB7C	zinc finger and BTB domain containing 7C	-0.458621	0.0369729
2235	FECH	ferrochelatase	-0.454723	0.0312424
51099	ABHD5	abhydrolase domain containing 5, lysophosphatidic acid acyltransferase	-0.451266	0.108539
2247	CRY1	fibroblast growth factor 2	-0.447443	0.0462848
9068	ANGPTL1	angiopoietin like 1	-0.447233	0.0639788
113612	CYP2U1	cytochrome P450 family 2 subfamily U member 1	-0.444968	0.0543767
3131	HLF	HLF transcription factor, PAR bZIP family member	-0.442369	0.050942
3899	AFF3	ALF transcription elongation factor 3	-0.430889	0.0552818
256471	MFSD8	major facilitator superfamily domain containing 8	-0.411445	0.0261067
114034	TOE1	target of EGR1, exonuclease	-0.411207	0.10351
51465	UBE2J1	ubiquitin conjugating enzyme E2 J1	-0.408764	0.0753828
114789	SLC25A25	solute carrier family 25 member 25	-0.395995	0.10668
8531	YBX3	Y-box binding protein 3	-0.395483	0.0223612
266812	NAP1L5	nucleosome assembly protein 1 like 5	-0.387161	0.0513394
408	ARRB1	arrestin beta 1	-0.382392	0.048689
79683	ZDHHC14	zinc finger DHHC-type palmitoyltransferase 14	-0.381017	0.0311258
201973	PRIMPOL	primase and DNA directed polymerase	-0.376353	0.0339168
51284	TLR7	toll like receptor 7	-0.372661	0.0525005
57447	NDRG2	NDRG family member 2	-0.372048	0.0214638
23474	ETHE1	ETHE1 persulfide dioxygenase	-0.370235	0.0675491
1465	CSRP1	cysteine and glycine rich protein 1	-0.369166	0.0410258
8660	IRS2	insulin receptor substrate 2	-0.366102	0.0303408
666	BOK	BCL2 family apoptosis regulator BOK	-0.353321	0.105392
91653	BOC	BOC cell adhesion associated, oncogene regulated	-0.352158	0.0241565
3398	ID2	inhibitor of DNA binding 2	-0.335194	0.021826
22824	HSPA4L	heat shock protein family A (Hsp70) member 4 like	-0.330403	0.0488784
727936	GXYLT2	glucoside xylosyltransferase 2	-0.324548	0.0614654
6304	SATB1	SATB homeobox 1	-0.323333	0.101783
201799	TMEM154	transmembrane protein 154	-0.322143	0.0532968
395	ARHGAP6	Rho GTPase activating protein 6	-0.32004	0.0681123
23647	ARFIP2	ADP ribosylation factor interacting protein 2	-0.314687	0.102099
51015	ISOC1	isochorismatase domain containing 1	-0.296487	0.0371285
596	BCL2	BCL2 apoptosis regulator	-0.287794	9.75299e-13
11031	RAB31	RAB31, member RAS oncogene family	-0.28289	0.0694651
6575	SLC20A2	solute carrier family 20 member 2	-0.276354	0.105471
573	BAG1	BAG cochaperone 1	-0.270355	0.0299664
1154	CISH	cytokine inducible SH2 containing protein	-0.265092	0.0696419
2549	GAB1	GRB2 associated binding protein 1	-0.263163	0.0335862
64393	ZMAT3	zinc finger matrin-type 3	-0.261037	0.0280946
3566	IL4R	interleukin 4 receptor	-0.258624	0.0440625
4088	SMAD3	SMAD family member 3	-0.257285	0.0226259
488	ATP2A2	ATPase sarcoplasmic/endoplasmic reticulum Ca2+ transporting 2	-0.257128	0.101457
132720	FAM241A	family with sequence similarity 241 member A	-0.256941	0.0359891
4547	MTTP	microsomal triglyceride transfer protein	-0.256661	0.0814689
9759	HDAC4	histone deacetylase 4	-0.254763	0.0316856
558	AXL	AXL receptor tyrosine kinase	-0.242231	0.0609948
51390	AIG1	androgen induced 1	-0.237348	0.0592549
64762	GAREM1	GRB2 associated regulator of MAPK1 subtype 1	-0.235485	0.0487121
8727	CTNNAL1	catenin alpha like 1	-0.234405	0.0246178
94081	SFXN1	sideroflexin 1	-0.229707	0.023129
29063	ZCCHC4	zinc finger CCHC-type containing 4	-0.229428	0.0466414
2028	ENPEP	glutamyl aminopeptidase	-0.226908	0.0726425
55090	MED9	mediator complex subunit 9	-0.226413	0.0523269
1408	CRY2	cryptochrome circadian regulator 2	-0.222291	0.0402619
79594	MUL1	mitochondrial E3 ubiquitin protein ligase 1	-0.219225	0.0421016
3725	JUN	Jun proto-oncogene, AP-1 transcription factor subunit	-0.217896	0.0553193
9446	GSTO1	glutathione S-transferase omega 1	-0.217614	0.0505361
50862	RNF141	ring finger protein 141	-0.217173	0.0414558
1026	CDKN1A	cyclin dependent kinase inhibitor 1A	-0.21679	0.0563933
51247	PAIP2	poly(A) binding protein interacting protein 2	-0.213872	0.037063
7159	TP53BP2	tumor protein p53 binding protein 2	-0.212624	0.107968
873	CBR1	carbonyl reductase 1	-0.212154	0.0723773
2752	GLUL	glutamate-ammonia ligase	-0.211877	0.0605009
9289	ADGRG1	adhesion G protein-coupled receptor G1	-0.205169	0.0498959
114883	OSBPL9	oxysterol binding protein like 9	-0.203693	0.0204901
55650	PIGV	phosphatidylinositol glycan anchor biosynthesis class V	-0.203547	0.0583434
9531	BAG3	BAG cochaperone 3	-0.202892	0.0458326
23327	NEDD4L	NEDD4 like E3 ubiquitin protein ligase	-0.20139	0.0290506
5187	PER1	period circadian regulator 1	-0.196233	0.0626659
27068	PPA2	inorganic pyrophosphatase 2	-0.194002	0.0538798
8744	TNFSF9	TNF superfamily member 9	-0.193667	0.0869364
5187	PER1	period circadian regulator 1	-0.18896	0.0981069
8493	PPM1D	protein phosphatase, Mg2+/Mn2+ dependent 1D	-0.187807	0.499968
7726	TRIM26	tripartite motif containing 26	-0.18675	0.0361324
10507	SEMA4D	semaphorin 4D	-0.186457	0.0377343
26524	LATS2	large tumor suppressor kinase 2	-0.186317	0.0283412
79575	ABHD8	abhydrolase domain containing 8	-0.183001	0.0605858
91584	PLXNA4	plexin A4	-0.182624	0.0842053
8726	EED	embryonic ectoderm development	-0.180458	0.0551736
51573	GDE1	glycerophosphodiester phosphodiesterase 1	-0.176433	0.0393598
3309	HSPA5	heat shock protein family A (Hsp70) member 5	-0.175109	0.0220189
113189	CHST14	carbohydrate sulfotransferase 14	-0.173742	0.0517941
7327	UBE2G2	ubiquitin conjugating enzyme E2 G2	-0.169387	0.0322655
85439	STON2	stonin 2	-0.169273	0.0658727
81873	ARPC5L	actin related protein 2/3 complex subunit 5 like	-0.167247	0.0516785
147372	CCBE1	collagen and calcium binding EGF domains 1	-0.16553	0.0642074
84954	MPND	MPN domain containing	-0.164383	0.0596584
4832	NME3	NME/NM23 nucleoside diphosphate kinase 3	-0.162608	0.0773131
91010	FMNL3	formin like 3	-0.159747	0.0734836
51117	COQ4	coenzyme Q4	-0.158105	0.049128
2107	ETF1	eukaryotic translation termination factor 1	-0.155637	0.0241585
92106	OXNAD1	oxidoreductase NAD binding domain containing 1	-0.155362	0.0558838
10018	BCL2L11	BCL2 like 11	-0.154338	0.0701997
54893	MTMR10	myotubularin related protein 10	-0.154205	0.0434921
284207	METRNL	meteorin like, glial cell differentiation regulator	-0.152597	0.0615093
90627	STARD13	StAR related lipid transfer domain containing 13	-0.151913	0.0758894
27289	RND1	Rho family GTPase 1	-0.147555	0.0802538
4920	ROR2	receptor tyrosine kinase like orphan receptor 2	-0.146431	0.0410504
5567	PRKACB	protein kinase cAMP-activated catalytic subunit beta	-0.142455	0.0580184
6091	ROBO1	roundabout guidance receptor 1	-0.140914	0.0650417
5887	RAD23B	RAD23 homolog B, nucleotide excision repair protein	-0.140617	0.0281241
3033	HADH	hydroxyacyl-CoA dehydrogenase	-0.135797	0.0721437
23052	ENDOD1	endonuclease domain containing 1	-0.134135	0.0702866
5430	POLR2A	RNA polymerase II subunit A	-0.133842	0.0509903
150962	PUS10	pseudouridine synthase 10	-0.130897	0.0824959
1263	PLK3	polo like kinase 3	-0.126439	0.0837845
157285	PRAG1	PEAK1 related, kinase-activating pseudokinase 1	-0.125064	0.0437547
51776	MAP3K20	mitogen-activated protein kinase kinase kinase 20	-0.124093	0.071804
54948	MRPL16	mitochondrial ribosomal protein L16	-0.123669	0.0670224
3685	ITGAV	integrin subunit alpha V	-0.123312	0.0648459
1390	CREM	cAMP responsive element modulator	-0.11423	0.0718949
84333	PCGF5	polycomb group ring finger 5	-0.111508	0.0834271
6760	SS18	SS18 subunit of BAF chromatin remodeling complex	-0.109942	0.0426466
123355	LRRC28	leucine rich repeat containing 28	-0.1099	0.076868
5520	PPP2R2A	protein phosphatase 2 regulatory subunit Balpha	-0.109502	0.0512656
51335	NGRN	neugrin, neurite outgrowth associated	-0.109056	0.069744
51441	YTHDF2	YTH N6-methyladenosine RNA binding protein F2	-0.105153	0.0477733
4296	MAP3K11	mitogen-activated protein kinase kinase kinase 11	-0.102876	0.0566911
5932	RBBP8	RB binding protein 8, endonuclease	-0.101652	0.0652008
55696	RBM22	RNA binding motif protein 22	-0.0998245	0.0612737
6484	ST3GAL4	ST3 beta-galactoside alpha-2,3-sialyltransferase 4	-0.0986059	0.0755536
3579	CXCR2	C-X-C motif chemokine receptor 2	-0.0948864	0.0916664
1025	CDK9	cyclin dependent kinase 9	-0.0885399	0.0617294
9766	SUSD6	sushi domain containing 6	-0.0877402	0.0816884
10868	USP20	ubiquitin specific peptidase 20	-0.0846318	0.07578
4717	NDUFC1	NADH:ubiquinone oxidoreductase subunit C1	-0.0846208	0.0710665
836	CASP3	caspase 3	-0.083168	0.0739805
9836	LCMT2	leucine carboxyl methyltransferase 2	-0.0791473	0.0759118
26751	SH3YL1	SH3 and SYLF domain containing 1	-0.0788487	0.0814915
56963	RGMA	repulsive guidance molecule BMP co-receptor a	-0.0783134	0.0871533
79834	PEAK1	pseudopodium enriched atypical kinase 1	-0.0781619	0.064643
3799	KIF5B	kinesin family member 5B	-0.0744145	0.050773
64400	AKTIP	AKT interacting protein	-0.0721847	0.0773379
7915	ALDH5A1	aldehyde dehydrogenase 5 family member A1	-0.0699923	0.0927448
9219	MTA2	metastasis associated 1 family member 2	-0.0686598	0.060423
578	BAK1	BCL2 antagonist/killer 1	-0.0677028	0.0834967
9895	TECPR2	tectonin beta-propeller repeat containing 2	-0.0671611	0.0774683
10768	AHCYL1	adenosylhomocysteinase like 1	-0.0670456	0.0660286
2060	EPS15	epidermal growth factor receptor pathway substrate 15	-0.06632	0.0724588
80271	ITPKC	inositol-trisphosphate 3-kinase C	-0.0649821	0.0813094
7005	TEAD3	TEA domain transcription factor 3	-0.0612638	0.0663792
25771	TBC1D22A	TBC1 domain family member 22A	-0.0593787	0.0782172
132660	LIN54	lin-54 DREAM MuvB core complex component	-0.0587678	0.0799926
301	ANXA1	annexin A1	-0.0587398	0.077842
399979	SNX19	sorting nexin 19	-0.0582552	0.0738225
29803	REPIN1	replication initiator 1	-0.0548727	0.075988
56997	COQ8A	coenzyme Q8A	-0.0518581	0.0879643
8013	NR4A3	nuclear receptor subfamily 4 group A member 3	-0.0497273	0.0955218
56267	KYAT3	kynurenine aminotransferase 3	-0.0493388	0.0854172
54936	ADPRS	ADP-ribosylserine hydrolase	-0.0469979	0.0870563
55246	CCDC25	coiled-coil domain containing 25	-0.0464378	0.0835081
79960	JADE1	jade family PHD finger 1	-0.045956	0.084824
8678	BECN1	beclin 1	-0.0407956	0.0876659
4676	NAP1L4	nucleosome assembly protein 1 like 4	-0.0405121	0.0783002
4482	MSRA	methionine sulfoxide reductase A	-0.0365061	0.0924015
81603	TRIM8	tripartite motif containing 8	-0.0330193	0.0894643
26994	RNF11	ring finger protein 11	-0.0290412	0.0878526
23362	PSD3	pleckstrin and Sec7 domain containing 3	-0.0266047	0.0896739
6709	SPTAN1	spectrin alpha, non-erythrocytic 1	-0.0237076	0.0840584
4779	NFE2L1	NFE2 like bZIP transcription factor 1	-0.0224802	0.087432
4087	SMAD2	SMAD family member 2	-0.0222978	0.0872562
7026	NR2F2	nuclear receptor subfamily 2 group F member 2	-0.0217039	0.0982197
1854	DUT	deoxyuridine triphosphatase	-0.0196241	0.094771
5937	RBMS1	RNA binding motif single stranded interacting protein 1	-0.0195883	0.0908863
11346	SYNPO	synaptopodin	-0.0182832	0.0969135
51322	WAC	WW domain containing adaptor with coiled-coil	-0.0181397	0.0871601
54472	TOLLIP	toll interacting protein	-0.0180904	0.0942482
9261	MAPKAPK2	MAPK activated protein kinase 2	-0.0180133	0.090475
10048	RANBP9	RAN binding protein 9	-0.0163872	0.0921337
55748	CNDP2	carnosine dipeptidase 2	-0.0162833	0.0908766
8854	ALDH1A2	aldehyde dehydrogenase 1 family member A2	-0.0152446	0.0971077
2395	FXN	frataxin	-0.0141746	0.0970902
25945	NECTIN3	nectin cell adhesion molecule 3	-0.0133773	0.0950864
306	ANXA3	annexin A3	-0.0123047	0.0932973
306	ANXA3	annexin A3	-0.0123047	0.0932973
5467	PPARD	peroxisome proliferator activated receptor delta	-0.012223	0.0958095
8775	NAPA	NSF attachment protein alpha	-0.0109082	0.0950609
56904	SH3GLB2	SH3 domain containing GRB2 like, endophilin B2	-0.0101489	0.0959362
57017	COQ9	coenzyme Q9	-0.0204779	0.0995465
80854	SETD7	SET domain containing 7, histone lysine methyltransferase	-0.0186962	0.0996688
22980	TCF25	transcription factor 25	-0.0172372	0.099301
[truncated: 1 more columns]
