# Supplementary material for: Polyploidy Promotes Hypertranscription, Apoptosis Resistance, and Ciliogenesis in Cancer Cells and Mesenchymal Stem Cells of Various Origins: Comparative Transcriptome In Silico Study
Source: Int J Mol Sci. 2024 Apr 10;25(8):4185. doi: 10.3390/ijms25084185 (PMC11050069; doi:10.3390/ijms25084185)
Supplement: Supplementary file 1 [file ijms-25-04185-s001.zip › Supplementary Table S7 young_CARD_UP_OK _171.xlsx]

## Sheet: Sheet1
	Supplementary Table S7. Ploidy -upregulated genes in polyploid vs diploid young cardiomyocyte (CARD) derived from iPS (171 gene set )																																						GMPPA				CNOT2					COMMD2
NCBIid	Symb	Annot	logFC_iPSC_card	adj.P.Val_iPSC_card
55124	PIWIL2	piwi like RNA-mediated gene silencing 2	2.385	0.01
6556	SLC11A1	solute carrier family 11 member 1	2.106	0.01
23029	RBM34	RNA binding motif protein 34	1.884	0.0197702
83933	HDAC10	histone deacetylase 10	1.653	0.019587
3299	HSF4	heat shock transcription factor 4	1.509	0.0177584
63982	ANO3	anoctamin 3	1.281	0.0170766
9841	ZBTB24	zinc finger and BTB domain containing 24	0.599	0.0163006
162681	C18orf54	chromosome 18 open reading frame 54	0.572	0.016209
643836	ZFP62	ZFP62 zinc finger protein	0.567	0.0159301
64130	LIN7B	lin-7 homolog B, crumbs cell polarity complex component	0.542	0.0149055
3481	IGF2	insulin like growth factor 2	0.542	0.0128861
91408	BTF3L4	basic transcription factor 3 like 4	0.539	0.0125019
127495	LRRC39	leucine rich repeat containing 39	0.529	0.0121368
54935	DUSP23	dual specificity phosphatase 23	0.529	0.190677
6119	RPA3	replication protein A3	0.513	0.0279825
54916	TMEM260	transmembrane protein 260	0.492	0.0875257
3251	HPRT1	hypoxanthine phosphoribosyltransferase 1	0.469	0.0861184
51184	GPN3	GPN-loop GTPase 3	0.438	0.0852248
129531	MITD1	microtubule interacting and trafficking domain containing 1	0.429	0.0847954
79692	ZNF322	zinc finger protein 322	0.428	0.082316
57102	C12orf4	chromosome 12 open reading frame 4	0.42	0.0795695
84240	ZCCHC9	zinc finger CCHC-type containing 9	0.41	0.0790656
160897	GPR180	G protein-coupled receptor 180	0.407	0.0779329
51319	RSRC1	arginine and serine rich coiled-coil 1	0.399	0.0763971
29100	TMEM208	transmembrane protein 208	0.398	0.0762769
152185	SPICE1	spindle and centriole associated protein 1	0.396	0.0760803
9282	MED14	mediator complex subunit 14	0.383	0.0757828
203245	NAIF1	nuclear apoptosis inducing factor 1	0.37	0.0756948
11269	DDX19B	DEAD-box helicase 19B	0.37	0.0755528
121441	NEDD1	NEDD1 gamma-tubulin ring complex targeting factor	0.367	0.0730419
84450	ZNF512	zinc finger protein 512	0.365	0.0716936
9016	SLC25A14	solute carrier family 25 member 14	0.365	0.0712936
5610	EIF2AK2	eukaryotic translation initiation factor 2 alpha kinase 2	0.364	0.0706199
5744	PTHLH	parathyroid hormone like hormone	0.361	0.0700597
4137	MAPT	microtubule associated protein tau	0.355	0.0695726
10009	ZBTB33	zinc finger and BTB domain containing 33	0.354	0.068911
5716	PSMD10	proteasome 26S subunit, non-ATPase 10	0.341	0.0684692
196528	ARID2	AT-rich interaction domain 2	0.34	0.0678695
2887	GRB10	growth factor receptor bound protein 10	0.336	0.0674284
10285	SMNDC1	survival motor neuron domain containing 1	0.335	0.0662138
140465	MYL6B	myosin light chain 6B	0.334	0.0661635
3476	IGBP1	immunoglobulin binding protein 1	0.331	0.0661052
91147	TMEM67	transmembrane protein 67	0.325	0.0646192
29095	ORMDL2	ORMDL sphingolipid biosynthesis regulator 2	0.318	0.0644717
5062	PAK2	p21 (RAC1) activated kinase 2	0.317	0.0631999
221424	LRRC73	leucine rich repeat containing 73	0.316	0.0625156
55759	WDR12	WD repeat domain 12	0.311	0.0608685
87178	PNPT1	polyribonucleotide nucleotidyltransferase 1	0.31	0.0600027
89845	ABCC10	ATP binding cassette subfamily C member 10	0.309	0.059867
84918	LRP11	LDL receptor related protein 11	0.296	0.0596446
3720	JARID2	jumonji and AT-rich interaction domain containing 2	0.293	0.0596266
56474	CTPS2	CTP synthase 2	0.288	0.0596
55322	C5orf22	chromosome 5 open reading frame 22	0.288	0.0593655
55835	CENPJ	centromere protein J	0.282	0.0591092
5147	PDE6D	phosphodiesterase 6D	0.271	0.0590755
254048	UBN2	ubinuclein 2	0.268	0.0586423
139231	FAM199X	family with sequence similarity 199, X-linked	0.266	0.0579973
10467	ZNHIT1	zinc finger HIT-type containing 1	0.264	0.0558511
54619	CCNJ	cyclin J	0.258	0.0557176
154467	CCDC167	coiled-coil domain containing 167	0.252	0.0556221
4905	NSF	N-ethylmaleimide sensitive factor, vesicle fusing ATPase	0.248	0.0550801
55129	ANO10	anoctamin 10	0.244	0.0538099
5052	PRDX1	peroxiredoxin 1	0.239	0.0523126
23583	SMUG1	single-strand-selective monofunctional uracil-DNA glycosylase 1	0.232	0.0517013
80143	SIKE1	suppressor of IKBKE 1	0.231	0.0512404
6045	RNF2	ring finger protein 2	0.229	0.0502744
6045	RNF2	ring finger protein 2	0.227	0.0492617
10951	CBX1	chromobox 1	0.221	0.0488297
10466	COG5	component of oligomeric golgi complex 5	0.22	0.0486401
90957	DHX57	DExH-box helicase 57	0.22	0.047898
10643	IGF2BP3	insulin like growth factor 2 mRNA binding protein 3	0.219	0.0471265
55636	CHD7	chromodomain helicase DNA binding protein 7	0.218	0.0457567
83693	HSDL1	hydroxysteroid dehydrogenase like 1	0.218	0.044888
11171	STRAP	serine/threonine kinase receptor associated protein	0.217	0.0445158
6903	TBCC	tubulin folding cofactor C	0.212	0.0443285
51542	VPS54	VPS54 subunit of GARP complex	0.21	0.0431857
3480	IGF1R	insulin like growth factor 1 receptor	0.21	0.0428751
5110	PCMT1	protein-L-isoaspartate (D-aspartate) O-methyltransferase	0.207	0.0422117
23322	RPGRIP1L	RPGRIP1 like	0.206	0.0418124
10910	SUGT1	SGT1 homolog, MIS12 kinetochore complex assembly cochaperone	0.199	0.0414799
55330	BLOC1S4	biogenesis of lysosomal organelles complex 1 subunit 4	0.196	0.0409486
79752	ZFAND1	zinc finger AN1-type containing 1	0.196	0.0403007
80312	TET1	tet methylcytosine dioxygenase 1	0.189	0.0400565
6868	ADAM17	ADAM metallopeptidase domain 17	0.184	0.0399479
55832	CAND1	cullin associated and neddylation dissociated 1	0.183	0.0386227
9270	ITGB1BP1	integrin subunit beta 1 binding protein 1	0.181	0.0381748
4007	PRICKLE3	prickle planar cell polarity protein 3	0.178	0.0377814
387263	C6orf120	chromosome 6 open reading frame 120	0.176	0.0377042
7750	ZMYM2	zinc finger MYM-type containing 2	0.175	0.0369729
22950	SLC4A1AP	solute carrier family 4 member 1 adaptor protein	0.173	0.0369079
65985	AACS	acetoacetyl-CoA synthetase	0.165	0.0362848
55973	BCAP29	B cell receptor associated protein 29	0.165	0.0360635
29926	GMPPA	GDP-mannose pyrophosphorylase A	0.164	0.0355367
84313	VPS25	vacuolar protein sorting 25 homolog	0.163	0.0342381
145508	CEP128	centrosomal protein 128	0.162	0.0338988
29985	SLC39A3	solute carrier family 39 member 3	0.16	0.0330313
252839	TMEM9	transmembrane protein 9	0.16	0.0320101
670	BPHL	biphenyl hydrolase like	0.157	0.0319725
3189	HNRNPH3	heterogeneous nuclear ribonucleoprotein H3	0.157	0.0317241
988	CDC5L	cell division cycle 5 like	0.157	0.031708
5360	PLTP	phospholipid transfer protein	0.155	0.0309901
23097	CDK19	cyclin dependent kinase 19	0.153	0.0309078
55110	MAGOHB	mago homolog B, exon junction complex subunit	0.151	0.0308559
122961	ISCA2	iron-sulfur cluster assembly 2	0.147	0.0306651
84186	ZCCHC7	zinc finger CCHC-type containing 7	0.139	0.0298822
388962	BOLA3	bolA family member 3	0.137	0.029822
1479	CSTF3	cleavage stimulation factor subunit 3	0.131	0.0272581
7534	YWHAZ	tyrosine 3-monooxygenase/tryptophan 5-monooxygenase activation protein zeta	0.127	0.0271867
10644	IGF2BP2	insulin like growth factor 2 mRNA binding protein 2	0.126	0.0269393
25953	PNKD	PNKD metallo-beta-lactamase domain containing	0.122	0.025929
3927	LASP1	LIM and SH3 protein 1	0.122	0.0257978
26115	TANC2	tetratricopeptide repeat, ankyrin repeat and coiled-coil containing 2	0.12	0.0249189
949	SCARB1	scavenger receptor class B member 1	0.115	0.0244265
10955	SERINC3	serine incorporator 3	0.111	0.0242194
51534	VTA1	vesicle trafficking 1	0.11	0.023581
8575	PRKRA	protein activator of interferon induced protein kinase EIF2AK2	0.107	0.0230582
64210	MMS19	MMS19 homolog, cytosolic iron-sulfur assembly component	0.107	0.0224785
57348	TTYH1	tweety family member 1	0.106	0.0224308
254065	BRWD3	bromodomain and WD repeat domain containing 3	0.106	0.0212266
11222	MRPL3	mitochondrial ribosomal protein L3	0.102	0.0211172
55689	YEATS2	YEATS domain containing 2	0.1	0.0209518
23450	SF3B3	splicing factor 3b subunit 3	0.1	0.0208473
6880	TAF9	TATA-box binding protein associated factor 9	0.097	0.0208183
4356	MPP3	MAGUK p55 scaffold protein 3	0.0961	0.020684
51360	MBTPS2	membrane bound transcription factor peptidase, site 2	0.096	0.0203642
55665	URGCP	upregulator of cell proliferation	0.096	0.0200847
10362	HMG20B	high mobility group 20B	0.095	0.0192793
4848	CNOT2	CCR4-NOT transcription complex subunit 2	0.095	0.0192793
51122	COMMD2	COMM domain containing 2	0.0926	0.0191698
2332	FMR1	fragile X messenger ribonucleoprotein 1	0.0892	0.0189101
23197	FAF2	Fas associated factor family member 2	0.087	0.0188209
91544	UBXN11	UBX domain protein 11	0.087	0.0183435
79071	ELOVL6	ELOVL fatty acid elongase 6	0.0833	0.0180518
116840	CNTROB	centrobin, centriole duplication and spindle assembly protein	0.0826	0.0179878
10262	SF3B4	splicing factor 3b subunit 4	0.0791	0.0179831
85474	LBX2	ladybird homeobox 2	0.078	0.0174615
57634	EP400	E1A binding protein p400	0.078	0.016746
1639	DCTN1	dynactin subunit 1	0.077	0.016606
286410	ATP11C	ATPase phospholipid transporting 11C	0.076	0.0162137
23435	TARDBP	TAR DNA binding protein	0.073	0.0154195
1716	DGUOK	deoxyguanosine kinase	0.073	0.0152911
10695	CNPY3	canopy FGF signaling regulator 3	0.0728	0.0142985
54742	LY6K	lymphocyte antigen 6 family member K	0.072	0.0142029
9950	GOLGA5	golgin A5	0.071	0.0141418
8295	TRRAP	transformation/transcription domain associated protein	0.068	0.0138877
6827	SUPT4H1	SPT4 homolog, DSIF elongation factor subunit	0.066	0.0129783
221184	CPNE2	copine 2	0.0653	0.0126057
11020	IFT27	intraflagellar transport 27	0.065	0.0124051
2673	GFPT1	glutamine--fructose-6-phosphate transaminase 1	0.0643	0.0121087
4040	LRP6	LDL receptor related protein 6	0.0632	0.0114873
9689	BZW1	basic leucine zipper and W2 domains 1	0.063	0.0112903
116064	LRRC58	leucine rich repeat containing 58	0.0621	0.0110336
23613	ZMYND8	zinc finger MYND-type containing 8	0.0615	0.010479
4651	MYO10	myosin X	0.0605	0.0968536
6601	SMARCC2	SWI/SNF related, matrix associated, actin dependent regulator of chromatin subfamily c member 2	0.059	0.0960626
53345	TM6SF2	transmembrane 6 superfamily member 2	0.058	0.0942929
79035	NABP2	nucleic acid binding protein 2	0.054	0.091377
79576	NKAP	NFKB activating protein	0.047	0.0849705
10902	BRD8	bromodomain containing 8	0.043	0.0733891
64789	EXO5	exonuclease 5	0.041	0.0716059
5119	CHMP1A	charged multivesicular body protein 1A	0.04	0.0669601
6944	VPS72	vacuolar protein sorting 72 homolog	0.04	0.0540717
139341	FUNDC1	FUN14 domain containing 1	0.036	0.0442657
283237	TTC9C	tetratricopeptide repeat domain 9C	0.034	0.0422253
5255	PHKA1	phosphorylase kinase regulatory subunit alpha 1	0.034	0.0378117
9587	MAD2L1BP	MAD2L1 binding protein	0.022	0.0365455
25852	ARMC8	armadillo repeat containing 8	0.021	0.0300519
11187	PKP3	plakophilin 3	0.018	0.0285557
9761	MLEC	malectin	0.017	0.0276796
84328	LZIC	leucine zipper and CTNNBIP1 domain containing	0.016	0.022562
91012	CERS5	ceramide synthase 5	0.015	0.0128678
84826	SFT2D3	SFT2 domain containing 3	0.012	0.00934993
729920	CRPPA	CDP-L-ribitol pyrophosphorylase A
[truncated: 1 more columns]
