# Supplementary material for: Polyploidy Promotes Hypertranscription, Apoptosis Resistance, and Ciliogenesis in Cancer Cells and Mesenchymal Stem Cells of Various Origins: Comparative Transcriptome In Silico Study
Source: Int J Mol Sci. 2024 Apr 10;25(8):4185. doi: 10.3390/ijms25084185 (PMC11050069; doi:10.3390/ijms25084185)
Supplement: Supplementary file 1 [file ijms-25-04185-s001.zip › Supplementary Table S8 Young_Card_DOWN_183 gene set .xlsx]

## Sheet: Sheet1
	Supplementary Table S8. Ploidy -downgulated genes in polyploid vs diploid young cardiomyocyte (CARD) derived from iPS (183 gene set)																																						GMPPA				CNOT2					COMMD2
NCBIid	Symb	Annot	logFC_young CARD_ 14 day	adj.P.Val_iPSC_card
26524	LATS2	large tumor suppressor kinase 2	-0.505	0.00905706
128553	TSHZ2	teashirt zinc finger homeobox 2	-0.866	0.00949646
9531	BAG3	BAG cochaperone 3	-0.588	0.0108732
4296	MAP3K11	mitogen-activated protein kinase kinase kinase 11	-0.55	0.0136413
1647	GADD45A	growth arrest and DNA damage inducible alpha	-1.063	0.0230297
666	BOK	BCL2 family apoptosis regulator BOK	-0.66	0.0245944
7005	TEAD3	TEA domain transcription factor 3	-0.317	0.0313058
408	ARRB1	arrestin beta 1	-0.467	0.0396774
8660	IRS2	insulin receptor substrate 2	-0.598	0.0405123
7205	TRIP6	thyroid hormone receptor interactor 6	-0.377	0.0412825
23005	MAPKBP1	mitogen-activated protein kinase binding protein 1	-0.56	0.0437659
6256	RXRA	retinoid X receptor alpha	-0.241	0.0438065
26118	WSB1	WD repeat and SOCS box containing 1	-0.516	0.0471248
79960	JADE1	jade family PHD finger 1	-0.319	0.050352
3419	IDH3A	isocitrate dehydrogenase (NAD(+)) 3 catalytic subunit alpha	-0.999	0.0509084
467	ATF3	activating transcription factor 3	-1.91	0.0587014
57492	ARID1B	AT-rich interaction domain 1B	-0.075	0.0592743
91283	MSANTD3	Myb/SANT DNA binding domain containing 3	-0.388	0.0594834
112616	CMTM7	CKLF like MARVEL transmembrane domain containing 7	-0.98	0.0606614
64651	CSRNP1	cysteine and serine rich nuclear protein 1	-1.226	0.0614254
1408	CRY2	cryptochrome circadian regulator 2	-0.376	0.0687164
8744	TNFSF9	TNF superfamily member 9	-2.404	0.0825085
25771	TBC1D22A	TBC1 domain family member 22A	-0.447	0.0887008
23612	PHLDA3	pleckstrin homology like domain family A member 3	-0.498	0.0894487
8861	LDB1	LIM domain binding 1	-0.336	0.0917248
23764	MAFF	MAF bZIP transcription factor F	-1.551	0.101192
64400	AKTIP	AKT interacting protein	-0.519	0.113866
84954	MPND	MPN domain containing	-0.44	0.121249
114789	SLC25A25	solute carrier family 25 member 25	-0.486	0.124714
10451	VAV3	vav guanine nucleotide exchange factor 3	-1.039	0.124772
6284	S100A13	S100 calcium binding protein A13	-1.862	0.133719
284207	METRNL	meteorin like, glial cell differentiation regulator	-0.466	0.138239
7375	USP4	ubiquitin specific peptidase 4	-0.318	0.151889
90507	SCRN2	secernin 2	-0.228	0.15313
1743	DLST	dihydrolipoamide S-succinyltransferase	-0.185	0.15706
6046	BRD2	bromodomain containing 2	-0.328	0.162699
4920	ROR2	receptor tyrosine kinase like orphan receptor 2	-0.245	0.166524
2131	EXT1	exostosin glycosyltransferase 1	-0.29	0.166927
23588	KLHDC2	kelch domain containing 2	-0.211	0.175371
81873	ARPC5L	actin related protein 2/3 complex subunit 5 like	-0.43	0.0201517
4123	MAN2C1	mannosidase alpha class 2C member 1	-0.36	0.0202324
9261	MAPKAPK2	MAPK activated protein kinase 2	-0.37	0.0202525
29803	REPIN1	replication initiator 1	-0.379	0.0204063
2962	GTF2F1	general transcription factor IIF subunit 1	-0.189	0.0209418
51573	GDE1	glycerophosphodiester phosphodiesterase 1	-0.257	0.0213841
55466	DNAJA4	DnaJ heat shock protein family (Hsp40) member A4	-0.708	0.0221378
4832	NME3	NME/NM23 nucleoside diphosphate kinase 3	-0.495	0.0226276
149483	CCDC17	coiled-coil domain containing 17	-1.978	0.0226745
22980	TCF25	transcription factor 25	-0.239	0.0232703
55909	BIN3	bridging integrator 3	-0.282	0.0232742
201973	PRIMPOL	primase and DNA directed polymerase	-0.554	0.0234249
6560	SLC12A4	solute carrier family 12 member 4	-0.209	0.0234386
84333	PCGF5	polycomb group ring finger 5	-0.203	0.0234905
7098	TLR3	toll like receptor 3	-1.966	0.023819
25914	RTTN	rotatin	-0.236	0.0242662
6402	SELL	selectin L	-2.693	0.0247212
4088	SMAD3	SMAD family member 3	-0.192	0.0254616
54472	TOLLIP	toll interacting protein	-0.277	0.0254653
26353	HSPB8	heat shock protein family B (small) member 8	-0.726	0.0255521
54948	MRPL16	mitochondrial ribosomal protein L16	-0.137	0.026149
1847	DUSP5	dual specificity phosphatase 5	-1.225	0.02632
3338	DNAJC4	DnaJ heat shock protein family (Hsp40) member C4	-0.374	0.0271019
1346	COX7A1	cytochrome c oxidase subunit 7A1	-1.403	0.0275468
7327	UBE2G2	ubiquitin conjugating enzyme E2 G2	-0.277	0.0279998
123606	NIPA1	NIPA magnesium transporter 1	-0.365	0.0280672
51335	NGRN	neugrin, neurite outgrowth associated	-0.324	0.0281001
4676	NAP1L4	nucleosome assembly protein 1 like 4	-0.149	0.0284309
6709	SPTAN1	spectrin alpha, non-erythrocytic 1	-0.174	0.0290352
1742	DLG4	discs large MAGUK scaffold protein 4	-0.252	0.0297227
79575	ABHD8	abhydrolase domain containing 8	-0.819	0.0301735
29063	ZCCHC4	zinc finger CCHC-type containing 4	-0.51	0.030314
9219	MTA2	metastasis associated 1 family member 2	-0.115	0.0303672
6932	TCF7	transcription factor 7	-0.238	0.0313689
54206	ERRFI1	ERBB receptor feedback inhibitor 1	-0.512	0.0314113
56904	SH3GLB2	SH3 domain containing GRB2 like, endophilin B2	-0.209	0.0314484
23135	KDM6B	lysine demethylase 6B	-0.343	0.0315539
8775	NAPA	NSF attachment protein alpha	-0.223	0.0316581
81563	C1orf21	chromosome 1 open reading frame 21	-0.233	0.0317339
57648	KIAA1522	KIAA1522	-0.282	0.0336116
8604	SLC25A12	solute carrier family 25 member 12	-0.285	0.03407
1390	CREM	cAMP responsive element modulator	-0.134	0.0346451
306	ANXA3	annexin A3	-0.345	0.0351221
124359	CDYL2	chromodomain Y like 2	-0.61	0.0354385
3566	IL4R	interleukin 4 receptor	-0.335	0.035743
79365	BHLHE41	basic helix-loop-helix family member e41	-0.949	0.0357582
5187	PER1	period circadian regulator 1	-0.294	0.037198
79932	KIAA0319L	KIAA0319 like	-0.79	0.0387648
51441	YTHDF2	YTH N6-methyladenosine RNA binding protein F2	-0.15	0.0404268
51117	COQ4	coenzyme Q4	-0.212	0.0407076
8727	CTNNAL1	catenin alpha like 1	-0.72	0.0416919
395	ARHGAP6	Rho GTPase activating protein 6	-0.435	0.0417337
9124	PDLIM1	PDZ and LIM domain 1	-0.154	0.0421214
9377	COX5A	cytochrome c oxidase subunit 5A	-0.198	0.0423926
119587	CPXM2	carboxypeptidase X, M14 family member 2	-0.424	0.0443718
1958	EGR1	early growth response 1	-0.734	0.0443744
1263	PLK3	polo like kinase 3	-0.731	0.0469756
81603	TRIM8	tripartite motif containing 8	-0.124	0.0471306
5334	PLCL1	phospholipase C like 1 (inactive)	-0.156	0.0474905
10717	AP4B1	adaptor related protein complex 4 subunit beta 1	-0.244	0.0489053
5101	PCDH9	protocadherin 9	-0.225	0.0505691
114879	OSBPL5	oxysterol binding protein like 5	-0.22	0.052443
3553	IL1B	interleukin 1 beta	-0.987	0.0525126
23647	ARFIP2	ADP ribosylation factor interacting protein 2	-0.094	0.0526712
79142	PHF23	PHD finger protein 23	-0.172	0.0539453
578	BAK1	BCL2 antagonist/killer 1	-0.149	0.054073
8013	NR4A3	nuclear receptor subfamily 4 group A member 3	-0.893	0.0553479
23541	SEC14L2	SEC14 like lipid binding 2	-0.221	0.0557359
51138	COPS4	COP9 signalosome subunit 4	-0.088	0.0558959
3579	CXCR2	C-X-C motif chemokine receptor 2	-0.513	0.056318
10048	RANBP9	RAN binding protein 9	-0.124	0.0565391
29799	YPEL1	yippee like 1	-0.523	0.0567681
10672	GNA13	G protein subunit alpha 13	-0.71	0.0572816
10844	TUBGCP2	tubulin gamma complex associated protein 2	-0.162	0.0577799
92106	OXNAD1	oxidoreductase NAD binding domain containing 1	-0.12	0.0580733
6468	FBXW4	F-box and WD repeat domain containing 4	-0.177	0.0594939
2028	ENPEP	glutamyl aminopeptidase	-0.308	0.059774
9709	HERPUD1	homocysteine inducible ER protein with ubiquitin like domain 1	-0.146	0.0601998
9628	RGS6	regulator of G protein signaling 6	-0.357	0.0604878
55192	DNAJC17	DnaJ heat shock protein family (Hsp40) member C17	-0.139	0.0613522
7159	TP53BP2	tumor protein p53 binding protein 2	-0.081	0.0620808
80149	ZC3H12A	zinc finger CCCH-type containing 12A	-0.377	0.06253
219402	MTIF3	mitochondrial translational initiation factor 3	-0.1	0.0633138
9743	ARHGAP32	Rho GTPase activating protein 32	-0.79	0.0634315
27245	AHDC1	AT-hook DNA binding motif containing 1	-0.125	0.0640975
10868	USP20	ubiquitin specific peptidase 20	-0.172	0.0645234
58504	ARHGAP22	Rho GTPase activating protein 22	-0.417	0.0646578
54899	PXK	PX domain containing serine/threonine kinase like	-0.173	0.0655404
7106	TSPAN4	tetraspanin 4	-0.162	0.0658447
70	PER2	BCL2 apoptosis regulator	-0.278	0.066491
9701	PPP6R2	protein phosphatase 6 regulatory subunit 2	-0.74	0.0678317
54681	P4HTM	prolyl 4-hydroxylase, transmembrane	-0.102	0.0678815
146330	FBXL16	F-box and leucine rich repeat protein 16	-0.679	0.0695402
64393	ZMAT3	zinc finger matrin-type 3	-0.083	0.0700036
10363	HMG20A	high mobility group 20A	-0.113	0.0704168
7915	ALDH5A1	aldehyde dehydrogenase 5 family member A1	-0.145	0.0706592
127544	RNF19B	ring finger protein 19B	-0.123	0.0707114
3899	AFF3	ALF transcription elongation factor 3	-0.102	0.0707598
2395	FXN	frataxin	-0.226	0.0712646
57017	COQ9	coenzyme Q9	-0.088	0.0717033
27165	GLS2	glutaminase 2	-0.239	0.0720771
8878	SQSTM1	sequestosome 1	-0.101	0.0721544
3932	LCK	LCK proto-oncogene, Src family tyrosine kinase	-0.915	0.0722507
5887	RAD23B	RAD23 homolog B, nucleotide excision repair protein	-0.28	0.0743209
80854	SETD7	SET domain containing 7, histone lysine methyltransferase	-0.42	0.074483
56181	MTFR1L	mitochondrial fission regulator 1 like	-0.94	0.0748352
26030	PLEKHG3	pleckstrin homology and RhoGEF domain containing G3	-0.106	0.0760178
114034	TOE1	target of EGR1, exonuclease	-0.241	0.0761159
55650	PIGV	phosphatidylinositol glycan anchor biosynthesis class V	-0.17	0.0784689
8531	YBX3	Y-box binding protein 3	-0.051	0.0805545
573	BAG1	BAG cochaperone 1	-0.037	0.0805996
51390	AIG1	androgen induced 1	-0.45	0.0806592
2892	GRIA3	glutamate ionotropic receptor AMPA type subunit 3	-0.088	0.0814812
113612	CYP2U1	cytochrome P450 family 2 subfamily U member 1	-0.103	0.0815654
23052	ENDOD1	endonuclease domain containing 1	-0.213	0.0836042
51284	TLR7	toll like receptor 7	-0.394	0.0844001
55108	BSDC1	BSD domain containing 1	-0.19	0.0846177
80271	ITPKC	inositol-trisphosphate 3-kinase C	-0.071	0.0846977
2235	FECH	ferrochelatase	-0.37	0.0856766
4054	LTBP3	latent transforming growth factor beta binding protein 3	-0.37	0.086391
9895	TECPR2	tectonin beta-propeller repeat containing 2	-0.33	0.088685
301	ANXA1	annexin A1	-0.048	0.0891183
23327	NEDD4L	NEDD4 like E3 ubiquitin protein ligase	-0.043	0.0891804
8726	EED	embryonic ectoderm development	-0.33	0.0900847
4482	MSRA	methionine sulfoxide reductase A	-0.049	0.090549
6840	SVIL	supervillin	-0.02	0.0911232
91653	BOC	BOC cell adhesion associated, oncogene regulated	-0.089	0.0912688
85449	KIAA1755	KIAA1755	-0.234	0.0915424
4711	NDUFB5	NADH:ubiquinone oxidoreductase subunit B5	-0.27	0.0932982
80303	EFHD1	EF-hand domain family member D1	-0.043	0.0934621
10252	SPRY1	sprouty RTK signaling antagonist 1	-0.51	0.0936058
374659	HDDC3	HD domain containing 3	-0.092	0.0952291
51322	WAC	WW domain containing adaptor with coiled-coil	-0.03	0.0955549
55696	RBM22	RNA binding motif protein 22	-0.13	0.0958406
54843	SYTL2	synaptotagmin like 2	-0.2	0.096326
10663	CXCR6	C-X-C motif chemokine receptor 6	-0.49	0.0964453
6342	SCP2	sterol carrier protein 2	-0.11	0.0965561
488	ATP2A2	ATPase sarcoplasmic/endoplasmic reticulum Ca2+ transporting 2	-0.09	0.0969447
10957	PNRC1	proline rich nuclear receptor coactivator 1	-0.05	0.0974269
57447	NDRG2	NDRG family member 2	-0.08	0.0976144
51097	SCCPDH	saccharopine dehydrogenase (putative)	-0.03	0.0984962
5918	RARRES1	retinoic acid receptor responder 1	-0.12	0.0987111
9068	ANGPTL1	angiopoietin like 1	-0.15	0.0988212
79683	ZDHHC14	zinc finger DHHC-type palmitoyltransferase 14	-0.03	0.0995762
[truncated: 1 more columns]
