# Supplementary material for: Polyploidy Promotes Hypertranscription, Apoptosis Resistance, and Ciliogenesis in Cancer Cells and Mesenchymal Stem Cells of Various Origins: Comparative Transcriptome In Silico Study
Source: Int J Mol Sci. 2024 Apr 10;25(8):4185. doi: 10.3390/ijms25084185 (PMC11050069; doi:10.3390/ijms25084185)
Supplement: Supplementary file 1 [file ijms-25-04185-s001.zip › Supplementary Table S9 _Biosyst_233_iPSC_CP Up_233_biosyst_overRp_AV.xlsx]

## Sheet: Sheet1
Supplementary Table S9. Gene signatures and pathways that are enriched in ploidy up-regulated genes in cardiac progenitors CP derived from iPS of fibroblastic origin (233 gene set)
Pathway ID	Pathway name	Gene number	FDR
House-keeping functions
HKgenes_TIG'13	Housekeeping genes (Eisenberg, Levanon 2013)	88	2.019e-12
137992__Pathway Interaction Database__igf1_pathway	IGF1 pathway	5	1.676e-05
1268838__REACTOME__R-HSA-1852241	Organelle biogenesis and maintenance	14	4.435e-05
1269619__REACTOME__R-HSA-2428933	SHC-related events triggered by IGF1R	3	0.000127
1383018__REACTOME__R-HSA-8854518	AURKA Activation by TPX2	6	0.0002156
1269733__REACTOME__R-HSA-428359	Insulin-like Growth Factor-2 mRNA Binding Proteins (IGF2BPs/IMPs/VICKZs) bind RNA	2	0.0004077
1269876__REACTOME__R-HSA-5653656	Vesicle-mediated transport	17	0.001644
1383041__REACTOME__R-HSA-8856688	Golgi-to-ER retrograde transport	6	0.001809
1269877__REACTOME__R-HSA-199991	Membrane Trafficking	16	0.002238
1383038__REACTOME__R-HSA-6811442	Intra-Golgi and retrograde Golgi-to-ER traffic	7	0.005121
dN2dS_d2m_humanVSmouse_Genmcs'18	top 10% selection-favored in human vs mouse (cattle as reference) (Vinogradov, Anatskaya 2018)	29	0.005407
137919__Pathway Interaction Database__ncadherinpathway	N-cadherin signaling events	3	0.006703
138026__Pathway Interaction Database__insulin_pathway	Insulin Pathway	3	0.01392
Unicellularity
phylostrat_1-2_Trigos_PNAS'17	Unicellular genes (Trigos et al. 2017)	141	1.26e-19
HS_NCBIoma17_phyl_1-2	Unicellular genes (Vinogradov, Anatskaya 2021)	101	2.458e-09
HS_NCBIoma17_phyl_2	Unicellular eukaryotic genes (Vinogradov, Anatskaya 2021)	77	3.419e-08
HS_string_UCmed	Unicellular PIN cluster (Vinogradov, Anatskaya 2019)	56	0.0003367
HS-SC_ort1:1	Human-yeast 1:1 orthologs (Ensembl)	20	0.01015
1268853__REACTOME__R-HSA-5620924	Intraflagellar transport	3	0.01223
Chromatin remodeling and DNA damage response
EpiFactors	EpiFactors database (Medvedeva et al. 2015)	28	2.43e-08
1270433__REACTOME__R-HSA-4839726; 1270434__REACTOME__R-HSA-3247509	Chromatin organization; Chromatin modifying enzymes	14	4.888e-06
138026__Pathway Interaction Database__insulin_pathway	Insulin Pathway	3	0.01392
1268846__REACTOME__R-HSA-5617833	Cilium Assembly	13	3.572e-07
1268847__REACTOME__R-HSA-5620912	Anchoring of the basal body to the plasma membrane	8	2.015e-05
1269808__REACTOME__R-HSA-380284; 1269809__REACTOME__R-HSA-380259	Loss of proteins required for interphase microtubule organization from the centrosome; Loss of Nlp from mitotic centrosomes	6	0.0001709
1268853__REACTOME__R-HSA-5620924	Intraflagellar transport	3	0.01223
1269805__REACTOME__R-HSA-380287; 1269806__REACTOME__R-HSA-380270	Centrosome maturation; Recruitment of mitotic centrosome proteins and complexes	6	0.0003555
Myc signaling and stemness
169344__Pathway Interaction Database__myc_pathway	C-MYC pathway	3	0.00208
198826__WikiPathways__WP304	Kit receptor signaling pathway	4	0.005067
4609_MYC_int05	MYC proto-oncogene, bHLH transcription factor	18	0.007092
pluri_sign_BD'16	pluripotency signature (Kurum et al 2016)	13	0.01003
Myc_targets_PLoS1'08	Myc target genes (Kim et al. 2008)	27	0.01034
[35] Eisenberg, E.; Levanon, E.Y. Human Housekeeping Genes, Revisited. Trends Genet. TIG 2013, 29, 569–574, doi:10.1016/j.tig.2013.05.010.
[37] Trigos, A.S.; Pearson, R.B.; Papenfuss, A.T.; Goode, D.L. Altered Interactions between Unicellular and Multicellular Genes Drive Hallmarks of Transformation in a Diverse Range of Solid Tumors. Proc. Natl. Acad. Sci. U. S. A. 2017, 114, 6406–6411, doi:10.1073/pnas.1617743114.
[38] Vinogradov, A.E.; Anatskaya, O.V. Growth of Biological Complexity from Prokaryotes to Hominids Reflected in the Human Genome. Int. J. Mol. Sci. 2021, 22, 11640, doi:10.3390/ijms222111640.
[90] Vinogradov, A.E.; Anatskaya, O.V. Evolutionary Framework of the Human Interactome: Unicellular and Multicellular Giant Clusters. Biosystems 2019, 181, 82–87, doi:10.1016/j.biosystems.2019.05.004.
[39] Medvedeva, Y.A.; Lennartsson, A.; Ehsani, R.; Kulakovskiy, I.V.; Vorontsov, I.E.; Panahandeh, P.; Khimulya, G.; Kasukawa, T.; FANTOM Consortium; Drabløs, F. EpiFactors: A Comprehensive Database of Human Epigenetic Factors and Complexes. Database J. Biol. Databases Curation 2015, 2015, bav067, doi:10.1093/database/bav067.
[125] Kurum E, Benayoun BA, Malhotra A, George J, Ucar D. Computational inference of a genomic pluripotency signature in human and mouse stem cells. Biol Direct. 2016 Sep 17;11:47. doi: 10.1186/s13062-016-0148-z. PMID: 27639379
[124] Kim J, Lee JH, Iyer VR. Global identification of Myc target genes reveals its direct role in mitochondrial biogenesis and its E-box usage in vivo. PLoS One. 2008 Mar 12;3(3):e1798. doi: 10.1371/journal.pone.0001798. PMID: 18335064; PMCID: PMC2258436.
