# Supplementary material for: Polyploidy Promotes Hypertranscription, Apoptosis Resistance, and Ciliogenesis in Cancer Cells and Mesenchymal Stem Cells of Various Origins: Comparative Transcriptome In Silico Study
Source: Int J Mol Sci. 2024 Apr 10;25(8):4185. doi: 10.3390/ijms25084185 (PMC11050069; doi:10.3390/ijms25084185)
Supplement: Supplementary file 1 [file ijms-25-04185-s001.zip › Supplementary Table S10 244_CP_DOWN_AV.xlsx]

## Sheet: Sheet1
Supplementary Table S10. Gene signatures and pathways that are enriched in ploidy down-regulated genes in cardiac progenitors CP derived from iPS of fibroblastic origin (244 gene set)
Pathway ID	Pathway name	Gene number	O/E ratio	FDR
Tumor suppressor genes
TSG_down	Tumor suppressor genes (TSG) downregulated pan-cancer (Zhao et al. 2016)	40	3.42039	7.845e-12
TSG_all	Tumor suppressor genes (TSG) all (Zhao et al. 2016)	40	3.28897	2.609e-11
749777__KEGG__hsa04390; 750388__KEGG__ko04390	Hippo signaling pathway	7	3.79353	0.002599
Circadian clock
1269872__REACTOME__R-HSA-1368108	BMAL1:CLOCK,NPAS2 activates circadian gene expression	8	14.5144	6.65e-08
1458220__WikiPathways__WP3594	Circadian rythm related genes	14	5.81297	1.495e-07
1269871__REACTOME__R-HSA-400253	Circadian Clock	8	9.67625	1.682e-06
495__KEGG__ko04710; 83084__KEGG__hsa04710	Circadian rhythm	5	13.4609	3.119e-05
137978__Pathway Interaction Database__circadianpathway	Circadian rhythm pathway	3	19.2595	0.0004445
Apoptosis and cell death
1384709__KEGG__ko04215; 1384747__KEGG__hsa04215	Apoptosis - multiple species	7	18.2564	8.46e-08
198822__WikiPathways__WP1772	Apoptosis Modulation and Signaling	10	9.17117	1.387e-07
HALLMARK_P53_PATHWAY	http://www.gsea-msigdb.org/gsea/msigdb/cards/HALLMARK_P53_PATHWAY	13	5.45201	8.711e-07
470__KEGG__ko04210; 83060__KEGG__hsa04210	Apoptosis	10	6.04765	6.531e-06
HALLMARK_APOPTOSIS	http://www.gsea-msigdb.org/gsea/msigdb/cards/HALLMARK_APOPTOSIS	10	5.1837	2.521e-05
198797__WikiPathways__WP254	Apoptosis	7	6.9548	6.711e-05
198894__WikiPathways__WP314	Fas Ligand (FasL) pathway and Stress induction of Heat Shock Proteins (HSP) regulation	5	9.93543	0.0001403
1270268__REACTOME__R-HSA-109606	Intrinsic Pathway for Apoptosis	5	9.70438	0.0001572
137939__Pathway Interaction Database__p53downstreampathway	Direct p53 effectors	8	5.05804	0.0001941
1270261__REACTOME__R-HSA-5357801	Programmed Cell Death	9	4.39251	0.0002265
137974__Pathway Interaction Database__caspase_pathway	Caspase cascade in apoptosis	5	8.34576	0.0003232
169353__Pathway Interaction Database__myc_represspathway	Validated targets of C-MYC transcriptional repression	5	6.84079	0.0008157
1270262__REACTOME__R-HSA-109581	Apoptosis	8	3.97417	0.0009703
198896__WikiPathways__WP1742	TP53 Network	3	13.1775	0.001428
Immunity	Immunity
HALLMARK_IL2_STAT5_SIGNALING	http://www.gsea-msigdb.org/gsea/msigdb/cards/HALLMARK_IL2_STAT5_SIGNALING	12	5.03262	5.291e-06
198779__WikiPathways__WP382	MAPK Signaling Pathway	11	5.46449	5.999e-06
1269310__REACTOME__R-HSA-1280215	Cytokine Signaling in Immune system	24	2.69944	1.055e-05
HALLMARK_INFLAMMATORY_RESPONSE	http://www.gsea-msigdb.org/gsea/msigdb/cards/HALLMARK_INFLAMMATORY_RESPONSE	11	4.59017	3.085e-05
137976__Pathway Interaction Database__il2_1pathway	IL2-mediated signaling events	6	9.62973	3.566e-05
920955__WikiPathways__WP1449	Regulation of toll-like receptor signaling pathway	9	5.40373	4.642e-05
138006__Pathway Interaction Database__atf2_pathway	ATF-2 transcription factor network	6	9.10447	4.928e-05
1269318__REACTOME__R-HSA-449147	Signaling by Interleukins	18	2.91131	5.375e-05
456__KEGG__ko04010; 83048__KEGG__hsa04010	MAPK signaling pathway	12	3.92742	6.213e-05
1269170__REACTOME__R-HSA-168256	Immune System	44	1.768	0.000125
198770__WikiPathways__WP127	IL-5 Signaling Pathway	4	8.34576	0.001309
198855__WikiPathways__WP75	Toll-like Receptor Signaling Pathway	6	4.90927	0.001436
672452__WikiPathways__WP2036	TNF related weak inducer of apoptosis (TWEAK) Signaling Pathway	4	7.94835	0.001574
198885__WikiPathways__WP49	IL-2 Signaling Pathway	4	7.94835	0.001574
487__KEGG__ko04620; 83076__KEGG__hsa04620	Toll-like receptor signaling pathway	6	4.81486	0.001586
HALLMARK_TNFA_SIGNALING_VIA_NFKB	http://www.gsea-msigdb.org/gsea/msigdb/cards/HALLMARK_TNFA_SIGNALING_VIA_NFKB	20	8.34576	3.978e-13
[126] Zhao M, Kim P, Mitra R, Zhao J, Zhao Z. TSGene 2.0: an updated literature-based knowledgebase for tumor suppressor genes. Nucleic Acids Res. 2016 Jan 4;44(D1):D1023-31. doi: 10.1093/nar/gkv1268. Epub 2015 Nov 20. PMID: 26590405;
