# Supplementary material for: Polyploidy Promotes Hypertranscription, Apoptosis Resistance, and Ciliogenesis in Cancer Cells and Mesenchymal Stem Cells of Various Origins: Comparative Transcriptome In Silico Study
Source: Int J Mol Sci. 2024 Apr 10;25(8):4185. doi: 10.3390/ijms25084185 (PMC11050069; doi:10.3390/ijms25084185)
Supplement: Supplementary file 1 [file ijms-25-04185-s001.zip › Supplementary Table S11 Young CARD_UP_171_AV .xlsx]

## Sheet: Sheet1
Supplementary Table S11. Gene signatures and pathways that are enriched in ploidy up-regulated genes in young CARD derived from iPS of fibroblastic origin (171 gene set)
Pathway ID	Pathway name	Gene number	O/E ratio	FDR
Unicellularity
phylostrat_1-2_Trigos_PNAS'17	Unicellular genes (Trigos et al. 2017)	96	1.7661	2.623e-08
HS_NCBIoma17_phyl_1-2	Unicellular genes (Vinogradov, Anatskaya 2021)	81	1.85427	2.819e-07
HS_NCBIoma17_phyl_2	Unicellular eukaryotic genes (Vinogradov, Anatskaya 2021)	65	2.09265	3.161e-07
HS_string_UCmed	Unicellular PIN cluster (Vinogradov, Anatskaya 2019)	46	1.75484	0.01704
HS-SC_ort1:1 (Ensembl)	Human-yeast 1:1 orthologs	16	3.92835	0.102677
Chromatin remodeling and DNA damage response
EpiFactors	EpiFactors database (Medvedeva et al. 2015)	23	3.74898	1.923e-05
1270433__REACTOME__R-HSA-4839726; 1270434__REACTOME__R-HSA-3247509	Chromatin organization; Chromatin modifying enzymes	10	4.23798	0.02902
1270435__REACTOME__R-HSA-3214847	HATs acetylate histones	6	4.92441	0.168
HALLMARK_DNA_REPAIR	http://www.gsea-msigdb.org/gsea/msigdb/cards/HALLMARK_DNA_REPAIR	6	4.66178	0.12011
House-keeping functions
HKgenes_TIG'13	Housekeeping genes (Eisenberg, Levanon 2013)	66	2.10622	2.254e-07
topAT3SWdeg_MG'17	top 10% AT3 SW-degenerate synonymous sites (Vinogradov, Anatskaya 2017)	33	1.94143	0.02949
1269733__REACTOME__R-HSA-428359	Insulin-like Growth Factor-2 mRNA Binding Proteins (IGF2BPs/IMPs/VICKZs) bind RNA	2	77.6963	0.03917
dN2dS_d2m_primVSrodent_Genmcs'18	top 10% selection-favored in primates vs rodents (human-macaque vs mouse-rat) (Vinogradov, Anatskaya 2018)	25	1.94241	0.1534
137992__Pathway Interaction Database__igf1_pathway	IGF1 pathway	3	12.4869	0.10909
1269619__REACTOME__R-HSA-2428933	SHC-related events triggered by IGF1R	2	25.8988	0.12539
1269690__REACTOME__R-HSA-72163	mRNA Splicing - Major Pathway	6	3.92846	0.04173
dN2dS_d2m_humanVSmouse_Genmcs'18	top 10% selection-favored in human vs mouse (cattle as reference) (Vinogradov, Anatskaya 2018)	23	1.78701	0.04353
1269689__REACTOME__R-HSA-72172	mRNA Splicing	6	3.7595	0.0476
124832__KEGG__ko03040; 125136__KEGG__hsa03040	Spliceosome	5	6.38137	0.104971
1383040__REACTOME__R-HSA-6811438	Intra-Golgi traffic	3	7.94621	0.15205
1268838__REACTOME__R-HSA-1852241	Organelle biogenesis and maintenance	8	2.78315	0.1065
1383039__REACTOME__R-HSA-6811440	Retrograde transport at the Trans-Golgi-Network	3	7.13537	0.1065
1270007__REACTOME__R-HSA-194223	HDL-mediated lipid transport	2	11.6544	0.108924
413436__KEGG__hsa_M00352; 890599__KEGG__M00352	Spliceosome, U2-snRNP	2	11.6544	0.108924
Cilia
1268846__REACTOME__R-HSA-5617833	Cilium Assembly	7	4.33942	0.1591
1268847__REACTOME__R-HSA-5620912	Anchoring of the basal body to the plasma membrane	5	5.94614	0.1779
Myc signaling and stemness
169344__Pathway Interaction Database__myc_pathway	C-MYC pathway	3	15.8924	0.1313
(Molecular Signatures Database)	HALLMARK_MYC_TARGETS	20	4.62205	0.102458
[37] Trigos, A.S.; Pearson, R.B.; Papenfuss, A.T.; Goode, D.L. Altered Interactions between Unicellular and Multicellular Genes Drive Hallmarks of Transformation in a Diverse Range of Solid Tumors. Proc. Natl. Acad. Sci. U. S. A. 2017, 114, 6406–6411, doi:10.1073/pnas.1617743114.
[38] Vinogradov, A.E.; Anatskaya, O.V. Growth of Biological Complexity from Prokaryotes to Hominids Reflected in the Human Genome. Int. J. Mol. Sci. 2021, 22, 11640, doi:10.3390/ijms222111640.
[90] Vinogradov, A.E.; Anatskaya, O.V. Evolutionary Framework of the Human Interactome: Unicellular and Multicellular Giant Clusters. Biosystems 2019, 181, 82–87, doi:10.1016/j.biosystems.2019.05.004.
[39] Medvedeva, Y.A.; Lennartsson, A.; Ehsani, R.; Kulakovskiy, I.V.; Vorontsov, I.E.; Panahandeh, P.; Khimulya, G.; Kasukawa, T.; FANTOM Consortium; Drabløs, F. EpiFactors: A Comprehensive Database of Human Epigenetic Factors and Complexes. Database J. Biol. Databases Curation 2015, 2015, bav067, doi:10.1093/database/bav067.
[125] Kurum E, Benayoun BA, Malhotra A, George J, Ucar D. Computational inference of a genomic pluripotency signature in human and mouse stem cells. Biol Direct. 2016 Sep 17;11:47. doi: 10.1186/s13062-016-0148-z. PMID: 27639379
[124] Kim J, Lee JH, Iyer VR. Global identification of Myc target genes reveals its direct role in mitochondrial biogenesis and its E-box usage in vivo. PLoS One. 2008 Mar 12;3(3):e1798. doi: 10.1371/journal.pone.0001798. PMID: 18335064; PMCID: PMC2258436.
