# Supplementary material for: Polyploidy Promotes Hypertranscription, Apoptosis Resistance, and Ciliogenesis in Cancer Cells and Mesenchymal Stem Cells of Various Origins: Comparative Transcriptome In Silico Study
Source: Int J Mol Sci. 2024 Apr 10;25(8):4185. doi: 10.3390/ijms25084185 (PMC11050069; doi:10.3390/ijms25084185)
Supplement: Supplementary file 1 [file ijms-25-04185-s001.zip › Supplementary Table S12 young_CARD_DOWN_183_AV .xlsx]

## Sheet: Sheet1
Supplementary Table S12. Gene signatures and pathways that are enriched in ploidy downregulated genes in young CARD derived from iPS of fibroblastic origin (183 gene set)
Pathway ID	Pathway name	Gene number	O/E ratio	FDR
Tumor suppressor genes
1084759__KEGG__hsa_M00683; 1108222__KEGG__M00683	Hippo signaling	2	13.4536	0.104028
749777__KEGG__hsa04390; 750388__KEGG__ko04390	Hippo signaling pathway	6	4.19331	0.102459
TSG_down	Tumor suppressor genes (TSG) downregulated pan-cancer (https://bioinfo.uth.edu/TSGene/), Zhao, et al., 2016	26	2.86715	0.0005397
TSG_all	Tumor Suppressor Gene database (https://bioinfo.uth.edu/TSGene/), Zhao, et al., 2016	26	2.75698	0.0009862
Apoptosis and cell death
1458189__WikiPathways__WP2864	Apoptosis-related network due to altered Notch3 in ovarian cancer	3	6.09217	0.104423
HALLMARK_APOPTOSIS	http://www.gsea-msigdb.org/gsea/msigdb/cards/HALLMARK_APOPTOSIS	6	4.011	0.10267
137939__Pathway Interaction Database__p53downstreampathway	Direct p53 effectors	6	4.8922	0.11778
HALLMARK_P53_PATHWAY	http://www.gsea-msigdb.org/gsea/msigdb/cards/HALLMARK_P53_PATHWAY	10	5.40846	0.005996
Immunity
HALLMARK_TNFA_SIGNALING_VIA_NFKB	http://www.gsea-msigdb.org/gsea/msigdb/cards/HALLMARK_TNFA_SIGNALING_VIA_NFKB	16	8.61027	5.195e-08
HALLMARK_INFLAMMATORY_RESPONSE	http://www.gsea-msigdb.org/gsea/msigdb/cards/HALLMARK_INFLAMMATORY_RESPONSE	8	4.30514	0.08203
1269318__REACTOME__R-HSA-449147	Signaling by Interleukins	13	2.71157	0.145
1269310__REACTOME__R-HSA-1280215	Cytokine Signaling in Immune system	16	2.32083	0.1778
198908__WikiPathways__WP195	IL-1 signaling pathway	4	7.82752	0.1869
920955__WikiPathways__WP1449	Regulation of toll-like receptor signaling pathway	6	4.64583	0.10924
1269321__REACTOME__R-HSA-451927	Interleukin-2 signaling	8	3.33732	0.102417
1458253__WikiPathways__WP3858	Toll-like Receptor Signaling	3	10.4157	0.102417
1269299__REACTOME__R-HSA-2871796	FCERI mediated MAPK activation	8	3.29896	0.102459
1469468__KEGG__ko04659; 1469482__KEGG__hsa04659	Th17 cell differentiation	5	5.02937	0.102459
1269162__REACTOME__R-HSA-5602410; 1269163__REACTOME__R-HSA-5602415	TLR3 deficiency - HSE; UNC93B1 deficiency - HSE	1	107.628	0.104028
137976__Pathway Interaction Database__il2_1pathway	IL2-mediated signaling events	3	6.20933	0.04423
1269323__REACTOME__R-HSA-512988	Interleukin-3, 5 and GM-CSF signaling	7	2.82172	0.104423
Circadian clock
495__KEGG__ko04710; 83084__KEGG__hsa04710	Circadian rhythm	3	10.4157	0.2417
1269872__REACTOME__R-HSA-1368108	BMAL1:CLOCK,NPAS2 activates circadian gene expression	5	11.6987	0.0173
1269871__REACTOME__R-HSA-400253	Circadian Clock	5	7.79916	0.07644
Miscellaneous
782397__BIOCYC__HUMAN_PWY66-398; 908028__BIOCYC__META_PWY66-398	TCA cycle; TCA cycle III (animals)	2	13.4536	0.4028
777512__WikiPathways__WP2453	TCA Cycle and Deficiency of Pyruvate Dehydrogenase complex (PDHc)	2	13.4536	0.4028
HALLMARK_MITOTIC_SPINDLE	http://www.gsea-msigdb.org/gsea/msigdb/cards/HALLMARK_MITOTIC_SPINDLE	6	3.24508	0.4158
HS_string_MCmed	PIN cluster with metazoan median (Vinogradov, Anatskaya 2019)	41	1.51537	0.267
phylostrat_4-5_Trigos_PNAS'17	genes belonging to Metazoa-Eumetazoa (Trigos et al. 2017)	47	1.60639	0.07644
[126] Zhao M, Kim P, Mitra R, Zhao J, Zhao Z. TSGene 2.0: an updated literature-based knowledgebase for tumor suppressor genes. Nucleic Acids Res. 2016 Jan 4;44(D1):D1023-31. doi: 10.1093/nar/gkv1268. Epub 2015 Nov 20. PMID: 26590405; PMCID: PMC4702895.
